# Supplementary material for: Hybrid ARIMA and Neural Network Modelling Applied to Telecommunications in Urban Environments in the Amazon Region
Source: Hindawi journal article supplement (doi:10.1155/2020/2671746), 2020-02-24
Supplement: f1 [file 2671746.f1.zip]

Archive with 4 entries (4 files):
- 2671746.f1/avila_interp_1.csv
- 2671746.f1/dados_ED2_DIG_interp_1.csv
- 2671746.f1/ekoara1_interp_1.csv
- 2671746.f1/Intructions for .csv archives.txt
