# Supplementary material for: Hybrid ARIMA and Neural Network Modelling Applied to Telecommunications in Urban Environments in the Amazon Region
Source: Hindawi journal article supplement (doi:10.1155/2020/2671746), 2020-02-24
Supplement: f1 [file 2671746.f1.zip › 2671746.f1/avila_interp_1.csv]

1.00E+00	2.00E+00	3.00E+00	4.00E+00	5.00E+00	6.00E+00	7.00E+00	8.00E+00	9.00E+00	1.00E+01	1.10E+01	1.20E+01	1.30E+01	1.40E+01	1.50E+01	1.60E+01	1.70E+01	1.80E+01	1.90E+01	2.00E+01	2.10E+01	2.20E+01	2.30E+01	2.40E+01	2.50E+01
3.50E+00	5.61E+00	5.31E+00	6.01E+00	6.38E+00	6.34E+00	5.99E+00	4.85E+00	4.92E+00	4.04E+00	7.09E+00	6.51E+00	7.20E+00	7.51E+00	7.51E+00	7.59E+00	7.87E+00	7.96E+00	7.94E+00	8.73E+00	9.63E+00	1.08E+01	8.53E+00	8.12E+00	6.66E+00
3.48E+00	5.83E+00	5.43E+00	6.07E+00	6.38E+00	6.38E+00	6.55E+00	7.12E+00	7.23E+00	7.28E+00	7.13E+00	7.36E+00	7.72E+00	7.99E+00	7.99E+00	8.14E+00	8.69E+00	8.85E+00	8.84E+00	9.34E+00	9.83E+00	1.08E+01	8.57E+00	8.13E+00	6.65E+00
3.50E+00	5.87E+00	5.43E+00	6.00E+00	6.26E+00	6.26E+00	6.44E+00	7.07E+00	7.18E+00	7.24E+00	7.07E+00	7.29E+00	7.65E+00	7.91E+00	7.91E+00	8.06E+00	8.61E+00	8.76E+00	8.75E+00	9.28E+00	9.82E+00	1.08E+01	8.60E+00	8.17E+00	6.71E+00
3.46E+00	5.49E+00	5.21E+00	5.89E+00	6.26E+00	6.26E+00	6.43E+00	7.03E+00	7.15E+00	7.18E+00	7.08E+00	7.28E+00	7.64E+00	7.91E+00	7.91E+00	8.05E+00	8.59E+00	8.75E+00	8.74E+00	9.25E+00	9.78E+00	1.07E+01	8.58E+00	8.22E+00	6.87E+00
3.49E+00	5.37E+00	5.17E+00	5.91E+00	6.33E+00	6.33E+00	6.51E+00	7.10E+00	7.23E+00	7.25E+00	7.20E+00	7.38E+00	7.72E+00	7.97E+00	7.97E+00	8.10E+00	8.60E+00	8.75E+00	8.74E+00	9.34E+00	9.97E+00	1.10E+01	8.70E+00	8.36E+00	6.97E+00
3.56E+00	5.39E+00	5.18E+00	5.88E+00	6.27E+00	6.27E+00	6.45E+00	7.07E+00	7.20E+00	7.22E+00	7.17E+00	7.35E+00	7.70E+00	7.95E+00	7.94E+00	8.08E+00	8.59E+00	8.74E+00	8.72E+00	9.34E+00	9.99E+00	1.11E+01	8.65E+00	8.43E+00	7.16E+00
3.55E+00	5.34E+00	5.15E+00	5.87E+00	6.28E+00	6.27E+00	6.45E+00	7.05E+00	7.18E+00	7.19E+00	7.20E+00	7.37E+00	7.72E+00	7.97E+00	7.97E+00	8.11E+00	8.61E+00	8.76E+00	8.75E+00	9.38E+00	1.00E+01	1.12E+01	8.39E+00	8.35E+00	7.17E+00
3.55E+00	5.39E+00	5.17E+00	5.87E+00	6.26E+00	6.26E+00	6.43E+00	7.02E+00	7.12E+00	7.18E+00	6.99E+00	7.24E+00	7.62E+00	7.90E+00	7.90E+00	8.06E+00	8.65E+00	8.83E+00	8.81E+00	9.44E+00	1.01E+01	1.12E+01	8.51E+00	8.42E+00	7.22E+00
3.50E+00	5.67E+00	5.31E+00	5.92E+00	6.23E+00	6.23E+00	6.42E+00	7.09E+00	7.21E+00	7.28E+00	7.06E+00	7.30E+00	7.65E+00	7.92E+00	7.92E+00	8.07E+00	8.63E+00	8.80E+00	8.78E+00	9.38E+00	9.97E+00	1.11E+01	8.42E+00	8.42E+00	7.37E+00
3.52E+00	5.44E+00	5.19E+00	5.87E+00	6.25E+00	6.25E+00	6.44E+00	7.10E+00	7.22E+00	7.30E+00	7.05E+00	7.30E+00	7.66E+00	7.94E+00	7.94E+00	8.09E+00	8.67E+00	8.83E+00	8.82E+00	9.38E+00	9.90E+00	1.10E+01	8.20E+00	8.22E+00	7.11E+00
3.53E+00	5.49E+00	5.22E+00	5.88E+00	6.24E+00	6.24E+00	6.43E+00	7.08E+00	7.20E+00	7.25E+00	7.09E+00	7.32E+00	7.68E+00	7.95E+00	7.95E+00	8.10E+00	8.67E+00	8.83E+00	8.82E+00	9.37E+00	9.91E+00	1.10E+01	8.32E+00	8.17E+00	6.91E+00
3.54E+00	5.46E+00	5.21E+00	5.87E+00	6.23E+00	6.23E+00	6.42E+00	7.08E+00	7.21E+00	7.27E+00	7.09E+00	7.31E+00	7.67E+00	7.93E+00	7.93E+00	8.08E+00	8.63E+00	8.79E+00	8.77E+00	9.34E+00	9.91E+00	1.10E+01	8.40E+00	8.22E+00	6.93E+00
3.54E+00	5.40E+00	5.17E+00	5.86E+00	6.25E+00	6.25E+00	6.43E+00	7.06E+00	7.20E+00	7.21E+00	7.20E+00	7.37E+00	7.71E+00	7.95E+00	7.95E+00	8.08E+00	8.57E+00	8.72E+00	8.70E+00	9.32E+00	9.96E+00	1.10E+01	8.53E+00	8.33E+00	7.06E+00
3.53E+00	5.25E+00	5.10E+00	5.83E+00	6.26E+00	6.26E+00	6.44E+00	7.05E+00	7.18E+00	7.21E+00	7.10E+00	7.30E+00	7.65E+00	7.90E+00	7.90E+00	8.04E+00	8.57E+00	8.72E+00	8.70E+00	9.34E+00	9.99E+00	1.11E+01	8.54E+00	8.25E+00	6.82E+00
3.54E+00	5.23E+00	5.08E+00	5.82E+00	6.25E+00	6.25E+00	6.43E+00	7.04E+00	7.17E+00	7.19E+00	7.12E+00	7.32E+00	7.68E+00	7.95E+00	7.94E+00	8.09E+00	8.63E+00	8.79E+00	8.77E+00	9.36E+00	9.95E+00	1.10E+01	8.60E+00	8.33E+00	7.00E+00
3.55E+00	5.34E+00	5.14E+00	5.85E+00	6.24E+00	6.24E+00	6.42E+00	7.04E+00	7.16E+00	7.19E+00	7.09E+00	7.30E+00	7.67E+00	7.94E+00	7.94E+00	8.09E+00	8.64E+00	8.80E+00	8.79E+00	9.34E+00	9.89E+00	1.09E+01	8.51E+00	8.37E+00	7.22E+00
3.52E+00	5.55E+00	5.25E+00	5.90E+00	6.23E+00	6.24E+00	6.43E+00	7.09E+00	7.20E+00	7.28E+00	7.02E+00	7.27E+00	7.63E+00	7.90E+00	7.90E+00	8.05E+00	8.63E+00	8.79E+00	8.78E+00	9.34E+00	9.90E+00	1.09E+01	8.51E+00	8.31E+00	7.08E+00
3.50E+00	5.66E+00	5.31E+00	5.93E+00	6.25E+00	6.25E+00	6.44E+00	7.11E+00	7.23E+00	7.29E+00	7.10E+00	7.33E+00	7.67E+00	7.93E+00	7.93E+00	8.07E+00	8.62E+00	8.77E+00	8.76E+00	9.35E+00	9.93E+00	1.10E+01	8.41E+00	8.31E+00	7.13E+00
3.49E+00	5.75E+00	5.35E+00	5.93E+00	6.21E+00	6.21E+00	6.42E+00	7.11E+00	7.24E+00	7.32E+00	7.08E+00	7.31E+00	7.62E+00	7.87E+00	7.87E+00	8.00E+00	8.52E+00	8.67E+00	8.65E+00	9.24E+00	9.87E+00	1.09E+01	8.59E+00	8.38E+00	7.17E+00
3.49E+00	5.77E+00	5.37E+00	5.97E+00	6.26E+00	6.26E+00	6.45E+00	7.11E+00	7.23E+00	7.29E+00	7.11E+00	7.32E+00	7.64E+00	7.88E+00	7.88E+00	8.01E+00	8.51E+00	8.66E+00	8.64E+00	9.23E+00	9.84E+00	1.09E+01	8.49E+00	8.31E+00	7.11E+00
3.48E+00	5.81E+00	5.39E+00	5.98E+00	6.27E+00	6.27E+00	6.46E+00	7.12E+00	7.25E+00	7.32E+00	7.09E+00	7.32E+00	7.64E+00	7.89E+00	7.89E+00	8.03E+00	8.55E+00	8.71E+00	8.69E+00	9.28E+00	9.89E+00	1.09E+01	8.57E+00	8.40E+00	7.23E+00
3.48E+00	5.75E+00	5.37E+00	6.00E+00	6.31E+00	6.31E+00	6.50E+00	7.12E+00	7.23E+00	7.32E+00	7.01E+00	7.26E+00	7.59E+00	7.84E+00	7.84E+00	7.99E+00	8.53E+00	8.69E+00	8.67E+00	9.26E+00	9.87E+00	1.09E+01	8.61E+00	8.38E+00	7.17E+00
3.57E+00	5.44E+00	5.21E+00	5.90E+00	6.28E+00	6.28E+00	6.47E+00	7.10E+00	7.21E+00	7.31E+00	6.97E+00	7.23E+00	7.55E+00	7.80E+00	7.80E+00	7.95E+00	8.49E+00	8.65E+00	8.63E+00	9.24E+00	9.87E+00	1.10E+01	8.43E+00	8.36E+00	7.26E+00
3.54E+00	5.43E+00	5.20E+00	5.90E+00	6.28E+00	6.28E+00	6.47E+00	7.11E+00	7.23E+00	7.30E+00	7.08E+00	7.28E+00	7.55E+00	7.75E+00	7.75E+00	7.87E+00	8.31E+00	8.44E+00	8.43E+00	9.10E+00	9.81E+00	1.10E+01	8.30E+00	8.34E+00	7.34E+00
3.49E+00	5.27E+00	5.10E+00	5.84E+00	6.27E+00	6.26E+00	6.45E+00	7.07E+00	7.18E+00	7.24E+00	7.04E+00	7.22E+00	7.47E+00	7.66E+00	7.66E+00	7.77E+00	8.17E+00	8.30E+00	8.28E+00	8.99E+00	9.75E+00	1.09E+01	8.27E+00	8.34E+00	7.38E+00
3.49E+00	5.22E+00	5.08E+00	5.87E+00	6.33E+00	6.33E+00	6.49E+00	7.03E+00	7.14E+00	7.17E+00	7.06E+00	7.21E+00	7.44E+00	7.61E+00	7.61E+00	7.71E+00	8.07E+00	8.18E+00	8.16E+00	8.93E+00	9.76E+00	1.10E+01	8.27E+00	8.38E+00	7.44E+00
3.52E+00	5.33E+00	5.16E+00	5.93E+00	6.37E+00	6.37E+00	6.53E+00	7.08E+00	7.18E+00	7.24E+00	7.06E+00	7.21E+00	7.42E+00	7.58E+00	7.58E+00	7.67E+00	8.02E+00	8.13E+00	8.10E+00	8.88E+00	9.73E+00	1.09E+01	8.34E+00	8.41E+00	7.48E+00
3.51E+00	5.52E+00	5.26E+00	5.97E+00	6.35E+00	6.35E+00	6.50E+00	7.00E+00	7.09E+00	7.14E+00	6.98E+00	7.15E+00	7.41E+00	7.61E+00	7.61E+00	7.72E+00	8.14E+00	8.27E+00	8.25E+00	8.99E+00	9.80E+00	1.10E+01	8.41E+00	8.39E+00	7.34E+00
3.49E+00	6.16E+00	5.61E+00	6.14E+00	6.36E+00	6.37E+00	6.52E+00	7.05E+00	7.14E+00	7.22E+00	6.95E+00	7.16E+00	7.43E+00	7.64E+00	7.64E+00	7.76E+00	8.21E+00	8.34E+00	8.32E+00	9.07E+00	9.87E+00	1.11E+01	8.47E+00	8.38E+00	7.23E+00
3.50E+00	5.99E+00	5.53E+00	6.12E+00	6.40E+00	6.40E+00	6.55E+00	7.04E+00	7.11E+00	7.22E+00	6.84E+00	7.09E+00	7.38E+00	7.60E+00	7.60E+00	7.73E+00	8.23E+00	8.38E+00	8.36E+00	9.05E+00	9.80E+00	1.09E+01	8.46E+00	8.39E+00	7.32E+00
3.41E+00	5.90E+00	5.45E+00	6.05E+00	6.34E+00	6.34E+00	6.50E+00	7.02E+00	7.10E+00	7.19E+00	6.88E+00	7.12E+00	7.42E+00	7.65E+00	7.65E+00	7.79E+00	8.29E+00	8.44E+00	8.42E+00	9.08E+00	9.78E+00	1.09E+01	8.39E+00	8.38E+00	7.38E+00
3.40E+00	6.06E+00	5.56E+00	6.18E+00	6.46E+00	6.46E+00	6.59E+00	7.03E+00	7.10E+00	7.17E+00	6.92E+00	7.14E+00	7.44E+00	7.67E+00	7.67E+00	7.80E+00	8.29E+00	8.44E+00	8.42E+00	9.10E+00	9.82E+00	1.10E+01	8.40E+00	8.38E+00	7.33E+00
3.39E+00	6.18E+00	5.59E+00	6.11E+00	6.32E+00	6.32E+00	6.47E+00	6.96E+00	7.04E+00	7.11E+00	6.89E+00	7.11E+00	7.43E+00	7.67E+00	7.67E+00	7.81E+00	8.31E+00	8.46E+00	8.45E+00	9.08E+00	9.74E+00	1.08E+01	8.39E+00	8.36E+00	7.35E+00
3.39E+00	6.06E+00	5.53E+00	6.10E+00	6.34E+00	6.34E+00	6.51E+00	7.05E+00	7.14E+00	7.24E+00	6.89E+00	7.12E+00	7.39E+00	7.60E+00	7.60E+00	7.72E+00	8.19E+00	8.32E+00	8.31E+00	8.94E+00	9.63E+00	1.07E+01	8.39E+00	8.32E+00	7.32E+00
3.37E+00	6.16E+00	5.59E+00	6.12E+00	6.34E+00	6.34E+00	6.50E+00	7.05E+00	7.13E+00	7.24E+00	6.90E+00	7.10E+00	7.31E+00	7.48E+00	7.48E+00	7.58E+00	7.96E+00	8.08E+00	8.06E+00	8.79E+00	9.60E+00	1.07E+01	8.31E+00	8.27E+00	7.24E+00
3.44E+00	6.21E+00	5.64E+00	6.17E+00	6.39E+00	6.40E+00	6.56E+00	7.12E+00	7.22E+00	7.27E+00	7.10E+00	7.26E+00	7.48E+00	7.65E+00	7.65E+00	7.74E+00	8.10E+00	8.21E+00	8.19E+00	8.90E+00	9.66E+00	1.08E+01	8.38E+00	8.30E+00	7.23E+00
3.49E+00	6.24E+00	5.68E+00	6.24E+00	6.47E+00	6.48E+00	6.63E+00	7.14E+00	7.23E+00	7.28E+00	7.12E+00	7.28E+00	7.52E+00	7.70E+00	7.70E+00	7.80E+00	8.18E+00	8.29E+00	8.28E+00	8.93E+00	9.64E+00	1.07E+01	8.45E+00	8.32E+00	7.25E+00
3.48E+00	6.36E+00	5.74E+00	6.24E+00	6.43E+00	6.44E+00	6.58E+00	7.07E+00	7.18E+00	7.19E+00	7.16E+00	7.29E+00	7.55E+00	7.73E+00	7.73E+00	7.83E+00	8.20E+00	8.32E+00	8.30E+00	8.92E+00	9.59E+00	1.06E+01	8.35E+00	8.29E+00	7.30E+00
3.48E+00	6.30E+00	5.70E+00	6.20E+00	6.38E+00	6.39E+00	6.53E+00	7.03E+00	7.14E+00	7.16E+00	7.12E+00	7.27E+00	7.57E+00	7.78E+00	7.78E+00	7.89E+00	8.32E+00	8.45E+00	8.44E+00	9.01E+00	9.60E+00	1.06E+01	8.27E+00	8.14E+00	7.02E+00
3.49E+00	6.25E+00	5.68E+00	6.22E+00	6.44E+00	6.44E+00	6.58E+00	7.06E+00	7.15E+00	7.20E+00	7.05E+00	7.23E+00	7.53E+00	7.75E+00	7.75E+00	7.87E+00	8.33E+00	8.46E+00	8.45E+00	9.03E+00	9.62E+00	1.07E+01	8.25E+00	7.98E+00	6.66E+00
3.51E+00	6.30E+00	5.71E+00	6.21E+00	6.41E+00	6.41E+00	6.54E+00	7.00E+00	7.10E+00	7.11E+00	7.08E+00	7.24E+00	7.55E+00	7.77E+00	7.77E+00	7.89E+00	8.33E+00	8.47E+00	8.45E+00	9.03E+00	9.62E+00	1.07E+01	8.24E+00	7.99E+00	6.69E+00
3.57E+00	5.84E+00	5.45E+00	6.06E+00	6.37E+00	6.37E+00	6.52E+00	7.04E+00	7.15E+00	7.18E+00	7.09E+00	7.26E+00	7.55E+00	7.76E+00	7.76E+00	7.88E+00	8.32E+00	8.45E+00	8.44E+00	9.00E+00	9.58E+00	1.06E+01	8.30E+00	7.93E+00	6.52E+00
3.54E+00	5.53E+00	5.28E+00	6.01E+00	6.41E+00	6.41E+00	6.55E+00	7.04E+00	7.14E+00	7.17E+00	7.09E+00	7.26E+00	7.54E+00	7.76E+00	7.76E+00	7.87E+00	8.30E+00	8.43E+00	8.42E+00	8.97E+00	9.54E+00	1.05E+01	8.29E+00	7.87E+00	6.41E+00
3.47E+00	5.15E+00	5.07E+00	5.93E+00	6.44E+00	6.44E+00	6.59E+00	7.08E+00	7.18E+00	7.21E+00	7.11E+00	7.28E+00	7.55E+00	7.75E+00	7.75E+00	7.87E+00	8.29E+00	8.41E+00	8.40E+00	8.96E+00	9.54E+00	1.05E+01	8.27E+00	7.88E+00	6.42E+00
3.45E+00	5.28E+00	5.14E+00	5.97E+00	6.47E+00	6.46E+00	6.62E+00	7.16E+00	7.28E+00	7.27E+00	7.34E+00	7.43E+00	7.68E+00	7.85E+00	7.85E+00	7.94E+00	8.27E+00	8.37E+00	8.35E+00	8.91E+00	9.50E+00	1.05E+01	8.33E+00	8.00E+00	6.69E+00
3.46E+00	5.46E+00	5.23E+00	6.01E+00	6.45E+00	6.45E+00	6.62E+00	7.19E+00	7.30E+00	7.34E+00	7.21E+00	7.35E+00	7.58E+00	7.74E+00	7.74E+00	7.84E+00	8.19E+00	8.29E+00	8.28E+00	8.87E+00	9.49E+00	1.05E+01	8.31E+00	8.06E+00	6.86E+00
3.49E+00	5.41E+00	5.19E+00	5.91E+00	6.31E+00	6.31E+00	6.49E+00	7.11E+00	7.24E+00	7.26E+00	7.21E+00	7.34E+00	7.57E+00	7.73E+00	7.73E+00	7.82E+00	8.16E+00	8.27E+00	8.25E+00	8.86E+00	9.50E+00	1.05E+01	8.29E+00	8.05E+00	6.84E+00
3.45E+00	5.61E+00	5.28E+00	5.93E+00	6.27E+00	6.27E+00	6.45E+00	7.06E+00	7.19E+00	7.21E+00	7.16E+00	7.30E+00	7.54E+00	7.72E+00	7.72E+00	7.82E+00	8.18E+00	8.29E+00	8.27E+00	8.88E+00	9.54E+00	1.05E+01	8.36E+00	8.11E+00	6.91E+00
3.49E+00	5.95E+00	5.50E+00	6.10E+00	6.37E+00	6.38E+00	6.55E+00	7.13E+00	7.24E+00	7.29E+00	7.14E+00	7.29E+00	7.52E+00	7.68E+00	7.68E+00	7.78E+00	8.13E+00	8.24E+00	8.22E+00	8.84E+00	9.51E+00	1.05E+01	8.43E+00	8.19E+00	7.06E+00
3.46E+00	5.96E+00	5.48E+00	6.04E+00	6.30E+00	6.30E+00	6.47E+00	7.05E+00	7.18E+00	7.19E+00	7.17E+00	7.29E+00	7.53E+00	7.70E+00	7.70E+00	7.80E+00	8.15E+00	8.25E+00	8.24E+00	8.86E+00	9.54E+00	1.05E+01	8.47E+00	8.07E+00	6.70E+00
3.47E+00	5.81E+00	5.40E+00	6.02E+00	6.32E+00	6.32E+00	6.48E+00	7.03E+00	7.15E+00	7.14E+00	7.20E+00	7.30E+00	7.56E+00	7.73E+00	7.73E+00	7.83E+00	8.18E+00	8.29E+00	8.27E+00	8.94E+00	9.67E+00	1.07E+01	8.46E+00	8.07E+00	6.64E+00
3.43E+00	5.70E+00	5.35E+00	6.03E+00	6.38E+00	6.38E+00	6.50E+00	6.95E+00	7.06E+00	7.02E+00	7.16E+00	7.25E+00	7.52E+00	7.71E+00	7.71E+00	7.81E+00	8.17E+00	8.29E+00	8.27E+00	8.93E+00	9.64E+00	1.07E+01	8.42E+00	8.12E+00	6.80E+00
3.44E+00	5.71E+00	5.36E+00	6.03E+00	6.38E+00	6.38E+00	6.53E+00	7.02E+00	7.13E+00	7.13E+00	7.17E+00	7.29E+00	7.55E+00	7.73E+00	7.73E+00	7.83E+00	8.20E+00	8.31E+00	8.29E+00	8.90E+00	9.57E+00	1.05E+01	8.49E+00	8.13E+00	6.81E+00
3.46E+00	5.55E+00	5.28E+00	6.02E+00	6.42E+00	6.42E+00	6.56E+00	7.02E+00	7.15E+00	7.10E+00	7.29E+00	7.36E+00	7.61E+00	7.77E+00	7.77E+00	7.86E+00	8.17E+00	8.27E+00	8.25E+00	8.87E+00	9.54E+00	1.05E+01	8.40E+00	8.17E+00	6.99E+00
3.45E+00	5.16E+00	5.04E+00	5.87E+00	6.36E+00	6.35E+00	6.51E+00	7.05E+00	7.19E+00	7.14E+00	7.32E+00	7.40E+00	7.68E+00	7.87E+00	7.86E+00	7.96E+00	8.31E+00	8.42E+00	8.41E+00	9.01E+00	9.65E+00	1.07E+01	8.36E+00	8.18E+00	7.00E+00
3.45E+00	5.29E+00	5.12E+00	5.91E+00	6.37E+00	6.37E+00	6.51E+00	7.01E+00	7.14E+00	7.08E+00	7.30E+00	7.37E+00	7.66E+00	7.86E+00	7.86E+00	7.96E+00	8.33E+00	8.44E+00	8.42E+00	9.01E+00	9.62E+00	1.06E+01	8.31E+00	8.15E+00	7.01E+00
3.46E+00	5.16E+00	5.06E+00	5.90E+00	6.40E+00	6.40E+00	6.53E+00	6.97E+00	7.09E+00	7.02E+00	7.28E+00	7.36E+00	7.68E+00	7.89E+00	7.89E+00	8.00E+00	8.39E+00	8.51E+00	8.50E+00	9.12E+00	9.81E+00	1.08E+01	8.73E+00	8.35E+00	7.00E+00
3.48E+00	5.15E+00	5.06E+00	5.92E+00	6.43E+00	6.43E+00	6.55E+00	6.95E+00	7.07E+00	7.00E+00	7.26E+00	7.33E+00	7.65E+00	7.87E+00	7.87E+00	7.97E+00	8.37E+00	8.49E+00	8.48E+00	9.11E+00	9.81E+00	1.08E+01	8.73E+00	8.32E+00	6.94E+00
3.45E+00	5.11E+00	5.04E+00	5.91E+00	6.44E+00	6.43E+00	6.59E+00	7.14E+00	7.26E+00	7.26E+00	7.27E+00	7.40E+00	7.68E+00	7.88E+00	7.88E+00	7.99E+00	8.40E+00	8.52E+00	8.50E+00	9.12E+00	9.77E+00	1.08E+01	8.58E+00	8.28E+00	7.00E+00
3.46E+00	5.59E+00	5.28E+00	5.97E+00	6.33E+00	6.33E+00	6.49E+00	7.05E+00	7.17E+00	7.17E+00	7.18E+00	7.32E+00	7.62E+00	7.83E+00	7.83E+00	7.94E+00	8.36E+00	8.49E+00	8.47E+00	9.06E+00	9.69E+00	1.07E+01	8.56E+00	8.32E+00	7.15E+00
3.51E+00	5.82E+00	5.42E+00	6.03E+00	6.33E+00	6.33E+00	6.48E+00	6.97E+00	7.09E+00	7.08E+00	7.12E+00	7.26E+00	7.57E+00	7.80E+00	7.80E+00	7.91E+00	8.35E+00	8.49E+00	8.47E+00	9.06E+00	9.70E+00	1.06E+01	8.64E+00	8.42E+00	7.32E+00
3.52E+00	5.95E+00	5.50E+00	6.09E+00	6.36E+00	6.37E+00	6.52E+00	7.04E+00	7.15E+00	7.16E+00	7.13E+00	7.28E+00	7.57E+00	7.77E+00	7.77E+00	7.89E+00	8.31E+00	8.43E+00	8.42E+00	9.04E+00	9.72E+00	1.07E+01	8.65E+00	8.41E+00	7.26E+00
3.51E+00	5.89E+00	5.45E+00	6.02E+00	6.29E+00	6.29E+00	6.47E+00	7.10E+00	7.23E+00	7.24E+00	7.22E+00	7.36E+00	7.61E+00	7.80E+00	7.80E+00	7.90E+00	8.28E+00	8.39E+00	8.38E+00	8.99E+00	9.67E+00	1.06E+01	8.58E+00	8.28E+00	7.06E+00
3.53E+00	5.91E+00	5.51E+00	6.15E+00	6.47E+00	6.47E+00	6.58E+00	6.99E+00	7.09E+00	7.08E+00	7.14E+00	7.27E+00	7.59E+00	7.81E+00	7.80E+00	7.92E+00	8.35E+00	8.48E+00	8.47E+00	9.06E+00	9.69E+00	1.07E+01	8.54E+00	8.27E+00	7.06E+00
3.48E+00	5.88E+00	5.43E+00	6.00E+00	6.26E+00	6.26E+00	6.41E+00	6.94E+00	7.07E+00	7.05E+00	7.14E+00	7.27E+00	7.60E+00	7.82E+00	7.82E+00	7.94E+00	8.39E+00	8.52E+00	8.50E+00	9.10E+00	9.74E+00	1.07E+01	8.68E+00	8.34E+00	7.08E+00
3.48E+00	5.79E+00	5.40E+00	6.01E+00	6.32E+00	6.32E+00	6.48E+00	7.03E+00	7.16E+00	7.14E+00	7.22E+00	7.34E+00	7.65E+00	7.86E+00	7.86E+00	7.97E+00	8.39E+00	8.52E+00	8.50E+00	9.10E+00	9.75E+00	1.07E+01	8.70E+00	8.27E+00	6.88E+00
3.50E+00	5.68E+00	5.34E+00	6.00E+00	6.34E+00	6.34E+00	6.46E+00	6.90E+00	7.03E+00	6.94E+00	7.28E+00	7.33E+00	7.66E+00	7.87E+00	7.87E+00	7.97E+00	8.36E+00	8.48E+00	8.46E+00	9.06E+00	9.73E+00	1.06E+01	8.73E+00	8.32E+00	6.98E+00
3.52E+00	5.69E+00	5.33E+00	5.92E+00	6.22E+00	6.22E+00	6.35E+00	6.85E+00	7.00E+00	6.89E+00	7.28E+00	7.32E+00	7.65E+00	7.86E+00	7.86E+00	7.96E+00	8.34E+00	8.46E+00	8.44E+00	9.04E+00	9.70E+00	1.06E+01	8.69E+00	8.31E+00	7.02E+00
3.56E+00	5.83E+00	5.46E+00	6.10E+00	6.42E+00	6.42E+00	6.54E+00	6.95E+00	7.06E+00	7.01E+00	7.22E+00	7.31E+00	7.63E+00	7.85E+00	7.85E+00	7.96E+00	8.37E+00	8.49E+00	8.47E+00	9.06E+00	9.71E+00	1.06E+01	8.75E+00	8.32E+00	6.97E+00
3.56E+00	5.87E+00	5.43E+00	5.96E+00	6.20E+00	6.20E+00	6.36E+00	6.91E+00	7.05E+00	7.00E+00	7.20E+00	7.30E+00	7.64E+00	7.87E+00	7.87E+00	7.98E+00	8.42E+00	8.55E+00	8.54E+00	9.10E+00	9.72E+00	1.06E+01	8.80E+00	8.32E+00	6.95E+00
3.53E+00	5.74E+00	5.39E+00	6.04E+00	6.38E+00	6.38E+00	6.52E+00	7.03E+00	7.15E+00	7.13E+00	7.21E+00	7.34E+00	7.65E+00	7.87E+00	7.87E+00	7.99E+00	8.42E+00	8.55E+00	8.54E+00	9.14E+00	9.81E+00	1.08E+01	8.74E+00	8.36E+00	7.03E+00
3.50E+00	5.73E+00	5.36E+00	5.97E+00	6.28E+00	6.28E+00	6.46E+00	7.09E+00	7.22E+00	7.23E+00	7.21E+00	7.35E+00	7.62E+00	7.81E+00	7.81E+00	7.92E+00	8.32E+00	8.44E+00	8.42E+00	9.07E+00	9.79E+00	1.08E+01	8.78E+00	8.41E+00	7.11E+00
3.50E+00	5.83E+00	5.44E+00	6.07E+00	6.39E+00	6.39E+00	6.55E+00	7.10E+00	7.21E+00	7.23E+00	7.17E+00	7.32E+00	7.58E+00	7.77E+00	7.77E+00	7.87E+00	8.26E+00	8.38E+00	8.36E+00	8.91E+00	9.53E+00	1.03E+01	8.78E+00	8.26E+00	6.92E+00
3.48E+00	5.75E+00	5.37E+00	5.99E+00	6.29E+00	6.30E+00	6.47E+00	7.07E+00	7.20E+00	7.21E+00	7.21E+00	7.34E+00	7.59E+00	7.78E+00	7.78E+00	7.88E+00	8.25E+00	8.36E+00	8.35E+00	8.86E+00	9.45E+00	1.02E+01	8.78E+00	8.26E+00	6.98E+00
3.46E+00	5.70E+00	5.36E+00	6.03E+00	6.38E+00	6.38E+00	6.54E+00	7.07E+00	7.17E+00	7.20E+00	7.12E+00	7.27E+00	7.52E+00	7.71E+00	7.71E+00	7.81E+00	8.20E+00	8.32E+00	8.30E+00	8.88E+00	9.53E+00	1.04E+01	8.72E+00	8.27E+00	6.98E+00
3.46E+00	5.78E+00	5.39E+00	6.01E+00	6.32E+00	6.32E+00	6.46E+00	6.97E+00	7.09E+00	7.06E+00	7.16E+00	7.26E+00	7.54E+00	7.73E+00	7.73E+00	7.83E+00	8.20E+00	8.31E+00	8.30E+00	8.92E+00	9.62E+00	1.05E+01	8.76E+00	8.35E+00	7.08E+00
3.46E+00	5.75E+00	5.38E+00	6.04E+00	6.38E+00	6.38E+00	6.54E+00	7.09E+00	7.21E+00	7.22E+00	7.22E+00	7.36E+00	7.64E+00	7.84E+00	7.84E+00	7.95E+00	8.36E+00	8.48E+00	8.47E+00	9.01E+00	9.61E+00	1.04E+01	8.81E+00	8.40E+00	7.20E+00
3.46E+00	5.66E+00	5.33E+00	6.01E+00	6.36E+00	6.36E+00	6.54E+00	7.15E+00	7.27E+00	7.30E+00	7.23E+00	7.38E+00	7.65E+00	7.84E+00	7.84E+00	7.95E+00	8.35E+00	8.47E+00	8.46E+00	9.02E+00	9.65E+00	1.05E+01	8.85E+00	8.47E+00	7.29E+00
3.48E+00	5.74E+00	5.38E+00	6.05E+00	6.39E+00	6.39E+00	6.57E+00	7.16E+00	7.28E+00	7.31E+00	7.24E+00	7.38E+00	7.63E+00	7.81E+00	7.81E+00	7.91E+00	8.28E+00	8.39E+00	8.38E+00	8.98E+00	9.67E+00	1.05E+01	8.89E+00	8.51E+00	7.34E+00
3.52E+00	5.85E+00	5.45E+00	6.08E+00	6.39E+00	6.39E+00	6.55E+00	7.09E+00	7.22E+00	7.22E+00	7.23E+00	7.35E+00	7.60E+00	7.77E+00	7.77E+00	7.87E+00	8.22E+00	8.33E+00	8.31E+00	8.92E+00	9.63E+00	1.05E+01	8.90E+00	8.51E+00	7.35E+00
3.52E+00	5.26E+00	5.12E+00	5.92E+00	6.39E+00	6.38E+00	6.54E+00	7.04E+00	7.16E+00	7.15E+00	7.19E+00	7.32E+00	7.59E+00	7.79E+00	7.79E+00	7.89E+00	8.28E+00	8.40E+00	8.39E+00	8.97E+00	9.63E+00	1.05E+01	8.81E+00	8.43E+00	7.23E+00
3.52E+00	5.56E+00	5.20E+00	5.71E+00	5.95E+00	5.96E+00	6.18E+00	6.95E+00	7.10E+00	7.13E+00	7.05E+00	7.21E+00	7.50E+00	7.70E+00	7.70E+00	7.82E+00	8.24E+00	8.37E+00	8.35E+00	8.96E+00	9.65E+00	1.05E+01	8.73E+00	8.35E+00	7.11E+00
3.54E+00	5.55E+00	5.23E+00	5.80E+00	6.09E+00	6.09E+00	6.29E+00	6.96E+00	7.10E+00	7.12E+00	7.08E+00	7.20E+00	7.41E+00	7.56E+00	7.56E+00	7.65E+00	7.96E+00	8.07E+00	8.05E+00	8.74E+00	9.54E+00	1.05E+01	8.67E+00	8.33E+00	7.12E+00
3.51E+00	5.41E+00	5.11E+00	5.67E+00	5.95E+00	5.96E+00	6.19E+00	7.01E+00	7.17E+00	7.22E+00	7.09E+00	7.22E+00	7.43E+00	7.58E+00	7.58E+00	7.67E+00	7.99E+00	8.10E+00	8.08E+00	8.76E+00	9.54E+00	1.05E+01	8.66E+00	8.35E+00	7.18E+00
3.49E+00	5.82E+00	5.37E+00	5.90E+00	6.15E+00	6.15E+00	6.34E+00	6.98E+00	7.12E+00	7.14E+00	7.07E+00	7.20E+00	7.42E+00	7.58E+00	7.58E+00	7.67E+00	8.01E+00	8.11E+00	8.09E+00	8.78E+00	9.57E+00	1.05E+01	8.71E+00	8.37E+00	7.16E+00
3.47E+00	5.90E+00	5.42E+00	5.94E+00	6.17E+00	6.17E+00	6.35E+00	7.00E+00	7.14E+00	7.13E+00	7.20E+00	7.27E+00	7.47E+00	7.61E+00	7.61E+00	7.69E+00	7.96E+00	8.05E+00	8.03E+00	8.77E+00	9.64E+00	1.07E+01	8.74E+00	8.43E+00	7.23E+00
3.47E+00	5.77E+00	5.36E+00	5.94E+00	6.22E+00	6.22E+00	6.39E+00	6.98E+00	7.13E+00	7.08E+00	7.28E+00	7.32E+00	7.54E+00	7.68E+00	7.68E+00	7.75E+00	8.01E+00	8.10E+00	8.08E+00	8.79E+00	9.62E+00	1.06E+01	8.69E+00	8.29E+00	6.96E+00
3.48E+00	5.85E+00	5.39E+00	5.91E+00	6.15E+00	6.15E+00	6.31E+00	6.87E+00	7.02E+00	6.97E+00	7.17E+00	7.23E+00	7.47E+00	7.63E+00	7.63E+00	7.71E+00	8.02E+00	8.11E+00	8.09E+00	8.82E+00	9.66E+00	1.07E+01	8.66E+00	8.29E+00	6.97E+00
3.49E+00	5.88E+00	5.37E+00	5.78E+00	5.93E+00	5.94E+00	6.14E+00	6.86E+00	7.02E+00	7.02E+00	7.05E+00	7.17E+00	7.44E+00	7.63E+00	7.63E+00	7.73E+00	8.11E+00	8.23E+00	8.21E+00	8.86E+00	9.59E+00	1.05E+01	8.63E+00	8.24E+00	6.93E+00
3.53E+00	6.02E+00	5.50E+00	5.98E+00	6.17E+00	6.18E+00	6.34E+00	6.93E+00	7.06E+00	7.04E+00	7.13E+00	7.22E+00	7.47E+00	7.64E+00	7.63E+00	7.72E+00	8.05E+00	8.16E+00	8.14E+00	8.78E+00	9.50E+00	1.04E+01	8.59E+00	8.21E+00	6.94E+00
3.61E+00	5.96E+00	5.53E+00	6.08E+00	6.34E+00	6.34E+00	6.46E+00	6.90E+00	7.01E+00	6.97E+00	7.13E+00	7.21E+00	7.47E+00	7.65E+00	7.65E+00	7.74E+00	8.08E+00	8.19E+00	8.17E+00	8.88E+00	9.68E+00	1.08E+01	8.51E+00	8.25E+00	7.00E+00
3.66E+00	5.95E+00	5.58E+00	6.24E+00	6.58E+00	6.58E+00	6.67E+00	6.99E+00	7.06E+00	7.05E+00	7.08E+00	7.19E+00	7.44E+00	7.62E+00	7.62E+00	7.71E+00	8.07E+00	8.18E+00	8.16E+00	8.90E+00	9.74E+00	1.09E+01	8.60E+00	8.29E+00	6.97E+00
3.67E+00	6.00E+00	5.68E+00	6.46E+00	6.88E+00	6.87E+00	6.93E+00	7.10E+00	7.12E+00	7.15E+00	7.04E+00	7.19E+00	7.43E+00	7.60E+00	7.60E+00	7.70E+00	8.07E+00	8.18E+00	8.16E+00	8.88E+00	9.67E+00	1.07E+01	8.58E+00	8.29E+00	7.02E+00
3.49E+00	5.97E+00	5.61E+00	6.42E+00	6.85E+00	6.84E+00	6.89E+00	7.03E+00	7.06E+00	7.05E+00	7.10E+00	7.21E+00	7.47E+00	7.65E+00	7.65E+00	7.75E+00	8.11E+00	8.22E+00	8.21E+00	8.90E+00	9.68E+00	1.07E+01	8.64E+00	8.30E+00	7.00E+00
3.44E+00	6.03E+00	5.61E+00	6.35E+00	6.72E+00	6.72E+00	6.79E+00	7.03E+00	7.09E+00	7.07E+00	7.15E+00	7.26E+00	7.52E+00	7.71E+00	7.71E+00	7.81E+00	8.17E+00	8.28E+00	8.27E+00	8.92E+00	9.65E+00	1.06E+01	8.65E+00	8.28E+00	6.98E+00
3.48E+00	6.08E+00	5.59E+00	6.20E+00	6.47E+00	6.47E+00	6.60E+00	7.03E+00	7.11E+00	7.15E+00	7.05E+00	7.21E+00	7.48E+00	7.68E+00	7.68E+00	7.79E+00	8.20E+00	8.32E+00	8.30E+00	8.93E+00	9.64E+00	1.06E+01	8.68E+00	8.28E+00	6.97E+00
3.43E+00	6.00E+00	5.51E+00	6.10E+00	6.36E+00	6.37E+00	6.51E+00	7.00E+00	7.11E+00	7.12E+00	7.09E+00	7.23E+00	7.49E+00	7.67E+00	7.67E+00	7.78E+00	8.16E+00	8.28E+00	8.26E+00	8.89E+00	9.61E+00	1.05E+01	8.68E+00	8.31E+00	7.05E+00
3.34E+00	5.95E+00	5.47E+00	6.08E+00	6.37E+00	6.37E+00	6.50E+00	6.96E+00	7.06E+00	7.06E+00	7.06E+00	7.20E+00	7.47E+00	7.67E+00	7.67E+00	7.77E+00	8.17E+00	8.29E+00	8.27E+00	8.94E+00	9.69E+00	1.07E+01	8.66E+00	8.40E+00	7.23E+00
3.35E+00	5.89E+00	5.43E+00	6.06E+00	6.36E+00	6.37E+00	6.51E+00	7.00E+00	7.10E+00	7.13E+00	7.04E+00	7.20E+00	7.49E+00	7.69E+00	7.69E+00	7.81E+00	8.24E+00	8.37E+00	8.35E+00	8.99E+00	9.70E+00	1.07E+01	8.60E+00	8.38E+00	7.23E+00
3.53E+00	5.94E+00	5.51E+00	6.10E+00	6.39E+00	6.39E+00	6.52E+00	6.98E+00	7.10E+00	7.07E+00	7.18E+00	7.29E+00	7.57E+00	7.77E+00	7.77E+00	7.87E+00	8.26E+00	8.37E+00	8.36E+00	8.97E+00	9.65E+00	1.06E+01	8.62E+00	8.32E+00	7.13E+00
3.58E+00	5.93E+00	5.51E+00	6.10E+00	6.38E+00	6.38E+00	6.49E+00	6.90E+00	7.00E+00	6.98E+00	7.05E+00	7.18E+00	7.49E+00	7.71E+00	7.71E+00	7.82E+00	8.26E+00	8.39E+00	8.37E+00	8.99E+00	9.68E+00	1.06E+01	8.71E+00	8.35E+00	7.09E+00
3.61E+00	6.08E+00	5.61E+00	6.17E+00	6.43E+00	6.43E+00	6.56E+00	7.00E+00	7.08E+00	7.12E+00	6.99E+00	7.17E+00	7.45E+00	7.66E+00	7.66E+00	7.78E+00	8.21E+00	8.35E+00	8.33E+00	8.97E+00	9.70E+00	1.07E+01	8.72E+00	8.34E+00	7.04E+00
3.63E+00	6.03E+00	5.59E+00	6.15E+00	6.42E+00	6.42E+00	6.54E+00	6.94E+00	7.02E+00	7.05E+00	6.95E+00	7.13E+00	7.42E+00	7.64E+00	7.64E+00	7.76E+00	8.21E+00	8.34E+00	8.33E+00	8.91E+00	9.56E+00	1.04E+01	8.73E+00	8.33E+00	7.10E+00
3.55E+00	5.94E+00	5.50E+00	6.06E+00	6.31E+00	6.32E+00	6.46E+00	6.96E+00	7.07E+00	7.09E+00	7.03E+00	7.18E+00	7.46E+00	7.66E+00	7.66E+00	7.78E+00	8.19E+00	8.32E+00	8.30E+00	8.91E+00	9.63E+00	1.05E+01	8.95E+00	8.51E+00	7.29E+00
3.49E+00	6.03E+00	5.54E+00	6.09E+00	6.34E+00	6.34E+00	6.48E+00	6.97E+00	7.07E+00	7.09E+00	7.04E+00	7.22E+00	7.56E+00	7.80E+00	7.80E+00	7.93E+00	8.43E+00	8.57E+00	8.56E+00	9.06E+00	9.63E+00	1.03E+01	8.98E+00	8.51E+00	7.32E+00
3.57E+00	6.00E+00	5.53E+00	6.08E+00	6.32E+00	6.33E+00	6.48E+00	7.02E+00	7.14E+00	7.16E+00	7.10E+00	7.27E+00	7.59E+00	7.82E+00	7.82E+00	7.95E+00	8.42E+00	8.56E+00	8.55E+00	9.07E+00	9.67E+00	1.04E+01	9.02E+00	8.43E+00	7.04E+00
3.54E+00	6.14E+00	5.62E+00	6.17E+00	6.40E+00	6.41E+00	6.54E+00	7.03E+00	7.14E+00	7.14E+00	7.17E+00	7.32E+00	7.65E+00	7.88E+00	7.88E+00	8.01E+00	8.47E+00	8.61E+00	8.60E+00	9.15E+00	9.78E+00	1.06E+01	9.02E+00	8.39E+00	6.90E+00
3.50E+00	6.07E+00	5.58E+00	6.15E+00	6.41E+00	6.41E+00	6.56E+00	7.06E+00	7.16E+00	7.19E+00	7.09E+00	7.27E+00	7.59E+00	7.83E+00	7.83E+00	7.96E+00	8.45E+00	8.59E+00	8.58E+00	9.13E+00	9.76E+00	1.06E+01	9.01E+00	8.40E+00	6.92E+00
3.48E+00	6.23E+00	5.66E+00	6.20E+00	6.41E+00	6.42E+00	6.54E+00	6.97E+00	7.07E+00	7.06E+00	7.12E+00	7.28E+00	7.64E+00	7.89E+00	7.89E+00	8.03E+00	8.53E+00	8.68E+00	8.67E+00	9.20E+00	9.80E+00	1.06E+01	8.96E+00	8.37E+00	6.90E+00
3.53E+00	5.94E+00	5.51E+00	6.12E+00	6.41E+00	6.41E+00	6.54E+00	7.00E+00	7.11E+00	7.09E+00	7.19E+00	7.32E+00	7.66E+00	7.89E+00	7.89E+00	8.02E+00	8.48E+00	8.61E+00	8.60E+00	9.18E+00	9.84E+00	1.07E+01	8.98E+00	8.40E+00	6.90E+00
3.59E+00	5.85E+00	5.47E+00	6.08E+00	6.38E+00	6.38E+00	6.53E+00	7.04E+00	7.14E+00	7.16E+00	7.10E+00	7.26E+00	7.57E+00	7.78E+00	7.78E+00	7.90E+00	8.35E+00	8.49E+00	8.47E+00	9.13E+00	9.87E+00	1.08E+01	8.94E+00	8.42E+00	6.93E+00
3.58E+00	5.85E+00	5.48E+00	6.13E+00	6.45E+00	6.45E+00	6.58E+00	7.02E+00	7.11E+00	7.14E+00	7.05E+00	7.26E+00	7.65E+00	7.93E+00	7.93E+00	8.08E+00	8.65E+00	8.81E+00	8.80E+00	9.35E+00	9.94E+00	1.08E+01	8.97E+00	8.42E+00	6.92E+00
3.31E+00	5.94E+00	5.48E+00	6.15E+00	6.48E+00	6.48E+00	6.58E+00	6.93E+00	7.01E+00	6.99E+00	7.05E+00	7.23E+00	7.64E+00	7.92E+00	7.92E+00	8.08E+00	8.65E+00	8.81E+00	8.80E+00	9.34E+00	9.92E+00	1.08E+01	8.92E+00	8.40E+00	6.94E+00
3.36E+00	6.06E+00	5.53E+00	6.12E+00	6.39E+00	6.39E+00	6.55E+00	7.09E+00	7.19E+00	7.26E+00	7.03E+00	7.29E+00	7.67E+00	7.96E+00	7.96E+00	8.13E+00	8.74E+00	8.91E+00	8.90E+00	9.38E+00	9.88E+00	1.07E+01	8.94E+00	8.35E+00	6.84E+00
3.27E+00	5.61E+00	5.28E+00	6.05E+00	6.47E+00	6.47E+00	6.61E+00	7.10E+00	7.20E+00	7.21E+00	7.18E+00	7.36E+00	7.72E+00	7.98E+00	7.98E+00	8.12E+00	8.65E+00	8.80E+00	8.79E+00	9.35E+00	9.96E+00	1.09E+01	8.95E+00	8.24E+00	6.50E+00
2.78E+00	5.63E+00	5.19E+00	6.05E+00	6.49E+00	6.49E+00	6.63E+00	7.11E+00	7.20E+00	7.24E+00	7.12E+00	7.32E+00	7.65E+00	7.90E+00	7.90E+00	8.04E+00	8.55E+00	8.70E+00	8.69E+00	9.26E+00	9.87E+00	1.08E+01	8.78E+00	8.22E+00	6.63E+00
2.77E+00	5.60E+00	5.21E+00	6.17E+00	6.68E+00	6.68E+00	6.78E+00	7.10E+00	7.16E+00	7.19E+00	7.09E+00	7.31E+00	7.69E+00	7.98E+00	7.97E+00	8.13E+00	8.71E+00	8.87E+00	8.86E+00	9.37E+00	9.92E+00	1.08E+01	8.98E+00	8.28E+00	6.61E+00
2.80E+00	5.54E+00	5.18E+00	6.12E+00	6.63E+00	6.63E+00	6.73E+00	7.04E+00	7.10E+00	7.12E+00	7.06E+00	7.27E+00	7.68E+00	7.97E+00	7.97E+00	8.13E+00	8.72E+00	8.89E+00	8.88E+00	9.38E+00	9.92E+00	1.07E+01	8.99E+00	8.36E+00	6.80E+00
2.82E+00	5.64E+00	5.22E+00	6.09E+00	6.54E+00	6.54E+00	6.64E+00	7.01E+00	7.10E+00	7.07E+00	7.18E+00	7.35E+00	7.77E+00	8.07E+00	8.06E+00	8.22E+00	8.79E+00	8.96E+00	8.95E+00	9.40E+00	9.88E+00	1.07E+01	8.90E+00	8.29E+00	6.74E+00
2.81E+00	5.66E+00	5.23E+00	6.09E+00	6.54E+00	6.53E+00	6.66E+00	7.06E+00	7.15E+00	7.16E+00	7.15E+00	7.35E+00	7.74E+00	8.03E+00	8.03E+00	8.18E+00	8.76E+00	8.92E+00	8.91E+00	9.38E+00	9.88E+00	1.07E+01	8.96E+00	8.35E+00	6.81E+00
2.76E+00	5.75E+00	5.31E+00	6.24E+00	6.73E+00	6.72E+00	6.81E+00	7.09E+00	7.15E+00	7.16E+00	7.14E+00	7.30E+00	7.63E+00	7.87E+00	7.87E+00	7.99E+00	8.47E+00	8.61E+00	8.59E+00	9.14E+00	9.76E+00	1.06E+01	8.99E+00	8.41E+00	6.98E+00
2.69E+00	5.74E+00	5.28E+00	6.21E+00	6.69E+00	6.69E+00	6.79E+00	7.10E+00	7.16E+00	7.19E+00	7.09E+00	7.27E+00	7.58E+00	7.81E+00	7.81E+00	7.93E+00	8.40E+00	8.54E+00	8.52E+00	9.07E+00	9.69E+00	1.05E+01	8.96E+00	8.37E+00	6.95E+00
2.79E+00	5.66E+00	5.24E+00	6.14E+00	6.62E+00	6.61E+00	6.72E+00	7.06E+00	7.14E+00	7.14E+00	7.14E+00	7.29E+00	7.59E+00	7.81E+00	7.81E+00	7.92E+00	8.36E+00	8.49E+00	8.47E+00	9.04E+00	9.70E+00	1.05E+01	8.95E+00	8.37E+00	6.96E+00
2.85E+00	5.68E+00	5.25E+00	6.12E+00	6.57E+00	6.56E+00	6.66E+00	6.99E+00	7.07E+00	7.06E+00	7.12E+00	7.25E+00	7.56E+00	7.78E+00	7.78E+00	7.90E+00	8.33E+00	8.46E+00	8.45E+00	8.96E+00	9.56E+00	1.02E+01	9.00E+00	8.38E+00	7.02E+00
2.40E+00	5.70E+00	5.11E+00	5.95E+00	6.35E+00	6.34E+00	6.49E+00	6.98E+00	7.09E+00	7.10E+00	7.07E+00	7.24E+00	7.56E+00	7.80E+00	7.80E+00	7.93E+00	8.40E+00	8.53E+00	8.52E+00	8.99E+00	9.54E+00	1.02E+01	9.01E+00	8.38E+00	7.04E+00
2.51E+00	5.69E+00	5.13E+00	5.96E+00	6.36E+00	6.36E+00	6.51E+00	7.02E+00	7.13E+00	7.15E+00	7.09E+00	7.26E+00	7.57E+00	7.79E+00	7.79E+00	7.91E+00	8.37E+00	8.50E+00	8.49E+00	9.01E+00	9.60E+00	1.03E+01	9.00E+00	8.41E+00	7.08E+00
3.58E+00	5.74E+00	5.38E+00	5.99E+00	6.30E+00	6.30E+00	6.46E+00	6.98E+00	7.09E+00	7.12E+00	7.03E+00	7.23E+00	7.60E+00	7.86E+00	7.86E+00	8.00E+00	8.54E+00	8.69E+00	8.68E+00	9.21E+00	9.82E+00	1.06E+01	9.12E+00	8.57E+00	7.24E+00
3.59E+00	5.67E+00	5.37E+00	6.03E+00	6.38E+00	6.38E+00	6.54E+00	7.06E+00	7.16E+00	7.22E+00	7.02E+00	7.25E+00	7.58E+00	7.83E+00	7.83E+00	7.97E+00	8.50E+00	8.65E+00	8.64E+00	9.19E+00	9.83E+00	1.06E+01	9.08E+00	8.56E+00	7.23E+00
3.57E+00	5.63E+00	5.36E+00	6.09E+00	6.49E+00	6.49E+00	6.68E+00	7.31E+00	7.40E+00	7.53E+00	7.10E+00	7.35E+00	7.61E+00	7.82E+00	7.82E+00	7.95E+00	8.42E+00	8.55E+00	8.54E+00	9.09E+00	9.71E+00	1.05E+01	8.94E+00	8.42E+00	7.08E+00
3.55E+00	5.70E+00	5.43E+00	6.21E+00	6.63E+00	6.63E+00	6.67E+00	6.82E+00	6.88E+00	6.78E+00	7.14E+00	7.23E+00	7.65E+00	7.92E+00	7.92E+00	8.06E+00	8.56E+00	8.71E+00	8.70E+00	9.19E+00	9.73E+00	1.05E+01	8.94E+00	8.39E+00	6.99E+00
