# Supplementary material for: Hybrid ARIMA and Neural Network Modelling Applied to Telecommunications in Urban Environments in the Amazon Region
Source: Hindawi journal article supplement (doi:10.1155/2020/2671746), 2020-02-24
Supplement: f1 [file 2671746.f1.zip › 2671746.f1/dados_ED2_DIG_interp_1.csv]

1.00E+00	2.00E+00	3.00E+00	4.00E+00	5.00E+00	6.00E+00	7.00E+00	8.00E+00	9.00E+00	1.00E+01	1.10E+01	1.20E+01	1.30E+01	1.40E+01	1.50E+01	1.60E+01	1.70E+01	1.80E+01	1.90E+01	2.00E+01	2.10E+01	2.20E+01	2.30E+01	2.40E+01	2.50E+01
-3.33E+01	-3.34E+01	-3.69E+01	-3.44E+01	-5.29E+01	-5.89E+01	-2.92E+01	-2.47E+01	-2.49E+01	-2.09E+01	-2.01E+01	-1.89E+01	-1.67E+01	-1.89E+01	-1.88E+01	-2.48E+01	-2.88E+01	-3.66E+01	-3.23E+01	-2.98E+01	-3.15E+01	-2.52E+01	-2.89E+01	-3.45E+01	-3.06E+01
-3.38E+01	-3.44E+01	-3.93E+01	-3.57E+01	-5.95E+01	-5.97E+01	-3.02E+01	-2.57E+01	-2.64E+01	-2.11E+01	-2.06E+01	-1.96E+01	-1.78E+01	-1.97E+01	-1.95E+01	-2.62E+01	-2.96E+01	-3.72E+01	-3.28E+01	-3.17E+01	-3.16E+01	-2.62E+01	-3.02E+01	-3.55E+01	-3.14E+01
-3.03E+01	-2.98E+01	-3.52E+01	-3.30E+01	-4.94E+01	-5.67E+01	-2.71E+01	-2.22E+01	-2.23E+01	-1.86E+01	-1.82E+01	-1.74E+01	-1.52E+01	-1.74E+01	-1.67E+01	-2.12E+01	-2.74E+01	-3.30E+01	-2.90E+01	-2.70E+01	-2.91E+01	-2.35E+01	-2.40E+01	-3.22E+01	-2.98E+01
-3.40E+01	-3.45E+01	-3.99E+01	-3.58E+01	-5.98E+01	-6.00E+01	-3.03E+01	-2.59E+01	-2.67E+01	-2.12E+01	-2.09E+01	-1.97E+01	-1.81E+01	-2.02E+01	-1.97E+01	-2.62E+01	-2.99E+01	-3.80E+01	-3.29E+01	-3.20E+01	-3.16E+01	-2.71E+01	-3.04E+01	-3.62E+01	-3.21E+01
-3.09E+01	-3.18E+01	-3.58E+01	-3.39E+01	-5.12E+01	-5.74E+01	-2.86E+01	-2.22E+01	-2.39E+01	-1.95E+01	-1.89E+01	-1.80E+01	-1.55E+01	-1.78E+01	-1.80E+01	-2.31E+01	-2.82E+01	-3.42E+01	-3.17E+01	-2.86E+01	-3.12E+01	-2.41E+01	-2.65E+01	-3.30E+01	-3.03E+01
-3.38E+01	-3.41E+01	-3.93E+01	-3.54E+01	-5.73E+01	-5.93E+01	-3.01E+01	-2.53E+01	-2.60E+01	-2.10E+01	-2.05E+01	-1.91E+01	-1.77E+01	-1.92E+01	-1.93E+01	-2.62E+01	-2.93E+01	-3.67E+01	-3.26E+01	-3.10E+01	-3.16E+01	-2.59E+01	-2.96E+01	-3.47E+01	-3.13E+01
-3.35E+01	-3.39E+01	-3.92E+01	-3.47E+01	-5.51E+01	-5.90E+01	-2.93E+01	-2.53E+01	-2.53E+01	-2.09E+01	-2.02E+01	-1.89E+01	-1.72E+01	-1.92E+01	-1.90E+01	-2.51E+01	-2.92E+01	-3.66E+01	-3.24E+01	-3.02E+01	-3.16E+01	-2.55E+01	-2.96E+01	-3.46E+01	-3.10E+01
-3.48E+01	-3.56E+01	-4.01E+01	-3.58E+01	-6.01E+01	-6.01E+01	-3.16E+01	-2.63E+01	-2.68E+01	-2.15E+01	-2.17E+01	-2.06E+01	-1.86E+01	-2.10E+01	-2.05E+01	-2.67E+01	-3.02E+01	-3.92E+01	-3.32E+01	-3.25E+01	-3.33E+01	-2.73E+01	-3.11E+01	-3.67E+01	-3.25E+01
-3.28E+01	-3.24E+01	-3.58E+01	-3.43E+01	-5.13E+01	-5.88E+01	-2.89E+01	-2.45E+01	-2.48E+01	-2.07E+01	-1.95E+01	-1.81E+01	-1.57E+01	-1.86E+01	-1.86E+01	-2.45E+01	-2.83E+01	-3.62E+01	-3.22E+01	-2.88E+01	-3.12E+01	-2.50E+01	-2.80E+01	-3.39E+01	-3.04E+01
-3.47E+01	-3.52E+01	-4.01E+01	-3.58E+01	-5.99E+01	-6.00E+01	-3.11E+01	-2.62E+01	-2.67E+01	-2.13E+01	-2.16E+01	-2.02E+01	-1.85E+01	-2.03E+01	-2.05E+01	-2.64E+01	-3.00E+01	-3.82E+01	-3.30E+01	-3.20E+01	-3.32E+01	-2.72E+01	-3.07E+01	-3.67E+01	-3.21E+01
-3.42E+01	-3.45E+01	-3.89E+01	-3.54E+01	-5.76E+01	-5.97E+01	-3.05E+01	-2.57E+01	-2.62E+01	-2.11E+01	-2.10E+01	-1.97E+01	-1.78E+01	-1.99E+01	-1.99E+01	-2.59E+01	-2.96E+01	-3.77E+01	-3.28E+01	-3.12E+01	-3.27E+01	-2.66E+01	-3.00E+01	-3.59E+01	-3.16E+01
-3.44E+01	-3.47E+01	-3.93E+01	-3.55E+01	-5.84E+01	-5.98E+01	-3.07E+01	-2.59E+01	-2.64E+01	-2.12E+01	-2.12E+01	-1.99E+01	-1.81E+01	-2.00E+01	-2.01E+01	-2.61E+01	-2.98E+01	-3.78E+01	-3.28E+01	-3.15E+01	-3.29E+01	-2.68E+01	-3.03E+01	-3.62E+01	-3.18E+01
-3.45E+01	-3.49E+01	-3.96E+01	-3.57E+01	-5.90E+01	-5.99E+01	-3.08E+01	-2.60E+01	-2.65E+01	-2.12E+01	-2.13E+01	-2.00E+01	-1.83E+01	-2.01E+01	-2.03E+01	-2.62E+01	-2.99E+01	-3.80E+01	-3.29E+01	-3.17E+01	-3.30E+01	-2.70E+01	-3.04E+01	-3.64E+01	-3.19E+01
-3.46E+01	-3.50E+01	-3.98E+01	-3.57E+01	-5.94E+01	-6.00E+01	-3.09E+01	-2.61E+01	-2.66E+01	-2.12E+01	-2.14E+01	-2.01E+01	-1.84E+01	-2.02E+01	-2.03E+01	-2.63E+01	-2.99E+01	-3.81E+01	-3.29E+01	-3.18E+01	-3.31E+01	-2.71E+01	-3.06E+01	-3.65E+01	-3.20E+01
-3.47E+01	-3.51E+01	-3.99E+01	-3.58E+01	-5.96E+01	-6.00E+01	-3.10E+01	-2.61E+01	-2.67E+01	-2.12E+01	-2.15E+01	-2.01E+01	-1.85E+01	-2.02E+01	-2.04E+01	-2.64E+01	-3.00E+01	-3.81E+01	-3.29E+01	-3.19E+01	-3.31E+01	-2.72E+01	-3.06E+01	-3.66E+01	-3.20E+01
-3.47E+01	-3.51E+01	-4.00E+01	-3.58E+01	-5.97E+01	-6.00E+01	-3.10E+01	-2.61E+01	-2.67E+01	-2.13E+01	-2.15E+01	-2.02E+01	-1.85E+01	-2.03E+01	-2.04E+01	-2.64E+01	-3.00E+01	-3.81E+01	-3.30E+01	-3.20E+01	-3.32E+01	-2.72E+01	-3.07E+01	-3.66E+01	-3.20E+01
-3.47E+01	-3.52E+01	-4.00E+01	-3.58E+01	-5.98E+01	-6.00E+01	-3.11E+01	-2.62E+01	-2.67E+01	-2.13E+01	-2.15E+01	-2.02E+01	-1.85E+01	-2.03E+01	-2.04E+01	-2.64E+01	-3.00E+01	-3.82E+01	-3.30E+01	-3.20E+01	-3.32E+01	-2.72E+01	-3.07E+01	-3.66E+01	-3.21E+01
-3.47E+01	-3.52E+01	-4.01E+01	-3.58E+01	-5.98E+01	-6.00E+01	-3.11E+01	-2.62E+01	-2.67E+01	-2.13E+01	-2.16E+01	-2.02E+01	-1.85E+01	-2.03E+01	-2.05E+01	-2.64E+01	-3.00E+01	-3.82E+01	-3.30E+01	-3.20E+01	-3.32E+01	-2.72E+01	-3.07E+01	-3.67E+01	-3.21E+01
-3.47E+01	-3.52E+01	-4.01E+01	-3.58E+01	-5.99E+01	-6.00E+01	-3.11E+01	-2.62E+01	-2.67E+01	-2.13E+01	-2.16E+01	-2.02E+01	-1.85E+01	-2.03E+01	-2.05E+01	-2.64E+01	-3.00E+01	-3.82E+01	-3.30E+01	-3.20E+01	-3.32E+01	-2.72E+01	-3.07E+01	-3.67E+01	-3.21E+01
-3.47E+01	-3.52E+01	-4.01E+01	-3.58E+01	-5.99E+01	-6.00E+01	-3.11E+01	-2.62E+01	-2.67E+01	-2.13E+01	-2.16E+01	-2.02E+01	-1.85E+01	-2.03E+01	-2.05E+01	-2.64E+01	-3.00E+01	-3.82E+01	-3.30E+01	-3.20E+01	-3.32E+01	-2.72E+01	-3.07E+01	-3.67E+01	-3.21E+01
-3.47E+01	-3.52E+01	-4.01E+01	-3.58E+01	-5.99E+01	-6.00E+01	-3.11E+01	-2.62E+01	-2.67E+01	-2.13E+01	-2.16E+01	-2.02E+01	-1.85E+01	-2.03E+01	-2.05E+01	-2.64E+01	-3.00E+01	-3.82E+01	-3.30E+01	-3.20E+01	-3.32E+01	-2.72E+01	-3.07E+01	-3.67E+01	-3.21E+01
-3.47E+01	-3.52E+01	-4.01E+01	-3.58E+01	-5.99E+01	-6.00E+01	-3.11E+01	-2.62E+01	-2.67E+01	-2.13E+01	-2.16E+01	-2.02E+01	-1.85E+01	-2.03E+01	-2.05E+01	-2.64E+01	-3.00E+01	-3.82E+01	-3.30E+01	-3.20E+01	-3.32E+01	-2.72E+01	-3.07E+01	-3.67E+01	-3.21E+01
-3.47E+01	-3.52E+01	-4.01E+01	-3.58E+01	-5.99E+01	-6.00E+01	-3.11E+01	-2.62E+01	-2.67E+01	-2.13E+01	-2.16E+01	-2.02E+01	-1.85E+01	-2.03E+01	-2.05E+01	-2.64E+01	-3.00E+01	-3.82E+01	-3.30E+01	-3.20E+01	-3.32E+01	-2.72E+01	-3.07E+01	-3.67E+01	-3.21E+01
-3.47E+01	-3.52E+01	-4.01E+01	-3.58E+01	-5.99E+01	-6.00E+01	-3.11E+01	-2.62E+01	-2.67E+01	-2.13E+01	-2.16E+01	-2.02E+01	-1.85E+01	-2.03E+01	-2.05E+01	-2.64E+01	-3.00E+01	-3.82E+01	-3.30E+01	-3.20E+01	-3.32E+01	-2.72E+01	-3.07E+01	-3.67E+01	-3.21E+01
-3.47E+01	-3.52E+01	-4.01E+01	-3.58E+01	-5.99E+01	-6.00E+01	-3.11E+01	-2.62E+01	-2.67E+01	-2.13E+01	-2.16E+01	-2.02E+01	-1.85E+01	-2.03E+01	-2.05E+01	-2.64E+01	-3.00E+01	-3.82E+01	-3.30E+01	-3.20E+01	-3.32E+01	-2.72E+01	-3.07E+01	-3.67E+01	-3.21E+01
-3.47E+01	-3.52E+01	-4.01E+01	-3.58E+01	-5.99E+01	-6.00E+01	-3.11E+01	-2.62E+01	-2.67E+01	-2.13E+01	-2.16E+01	-2.02E+01	-1.85E+01	-2.03E+01	-2.05E+01	-2.64E+01	-3.00E+01	-3.82E+01	-3.30E+01	-3.20E+01	-3.32E+01	-2.72E+01	-3.07E+01	-3.67E+01	-3.21E+01
-3.47E+01	-3.52E+01	-4.01E+01	-3.58E+01	-5.99E+01	-6.00E+01	-3.11E+01	-2.62E+01	-2.67E+01	-2.13E+01	-2.16E+01	-2.02E+01	-1.85E+01	-2.03E+01	-2.05E+01	-2.64E+01	-3.00E+01	-3.82E+01	-3.30E+01	-3.20E+01	-3.32E+01	-2.72E+01	-3.07E+01	-3.67E+01	-3.21E+01
-3.47E+01	-3.52E+01	-4.01E+01	-3.58E+01	-5.99E+01	-6.00E+01	-3.11E+01	-2.62E+01	-2.67E+01	-2.13E+01	-2.16E+01	-2.02E+01	-1.85E+01	-2.03E+01	-2.05E+01	-2.64E+01	-3.00E+01	-3.82E+01	-3.30E+01	-3.20E+01	-3.32E+01	-2.72E+01	-3.07E+01	-3.67E+01	-3.21E+01
-3.47E+01	-3.52E+01	-4.01E+01	-3.58E+01	-5.99E+01	-6.00E+01	-3.11E+01	-2.62E+01	-2.67E+01	-2.13E+01	-2.16E+01	-2.02E+01	-1.85E+01	-2.03E+01	-2.05E+01	-2.64E+01	-3.00E+01	-3.82E+01	-3.30E+01	-3.20E+01	-3.32E+01	-2.72E+01	-3.07E+01	-3.67E+01	-3.21E+01
-3.47E+01	-3.52E+01	-4.01E+01	-3.58E+01	-5.99E+01	-6.00E+01	-3.11E+01	-2.62E+01	-2.67E+01	-2.13E+01	-2.16E+01	-2.02E+01	-1.85E+01	-2.03E+01	-2.05E+01	-2.64E+01	-3.00E+01	-3.82E+01	-3.30E+01	-3.20E+01	-3.32E+01	-2.72E+01	-3.07E+01	-3.67E+01	-3.21E+01
-3.47E+01	-3.52E+01	-4.01E+01	-3.58E+01	-5.99E+01	-6.00E+01	-3.11E+01	-2.62E+01	-2.67E+01	-2.13E+01	-2.16E+01	-2.02E+01	-1.85E+01	-2.03E+01	-2.05E+01	-2.64E+01	-3.00E+01	-3.82E+01	-3.30E+01	-3.20E+01	-3.32E+01	-2.72E+01	-3.07E+01	-3.67E+01	-3.21E+01
-3.47E+01	-3.52E+01	-4.01E+01	-3.58E+01	-5.99E+01	-6.00E+01	-3.11E+01	-2.62E+01	-2.67E+01	-2.13E+01	-2.16E+01	-2.02E+01	-1.85E+01	-2.03E+01	-2.05E+01	-2.64E+01	-3.00E+01	-3.82E+01	-3.30E+01	-3.20E+01	-3.32E+01	-2.72E+01	-3.07E+01	-3.67E+01	-3.21E+01
-3.47E+01	-3.52E+01	-4.01E+01	-3.58E+01	-5.99E+01	-6.00E+01	-3.11E+01	-2.62E+01	-2.67E+01	-2.13E+01	-2.16E+01	-2.02E+01	-1.85E+01	-2.03E+01	-2.05E+01	-2.64E+01	-3.00E+01	-3.82E+01	-3.30E+01	-3.20E+01	-3.32E+01	-2.72E+01	-3.07E+01	-3.67E+01	-3.21E+01
-3.47E+01	-3.52E+01	-4.01E+01	-3.58E+01	-5.99E+01	-6.00E+01	-3.11E+01	-2.62E+01	-2.67E+01	-2.13E+01	-2.16E+01	-2.02E+01	-1.85E+01	-2.03E+01	-2.05E+01	-2.64E+01	-3.00E+01	-3.82E+01	-3.30E+01	-3.20E+01	-3.32E+01	-2.72E+01	-3.07E+01	-3.67E+01	-3.21E+01
-3.47E+01	-3.52E+01	-4.01E+01	-3.58E+01	-5.99E+01	-6.00E+01	-3.11E+01	-2.62E+01	-2.67E+01	-2.13E+01	-2.16E+01	-2.02E+01	-1.85E+01	-2.03E+01	-2.05E+01	-2.64E+01	-3.00E+01	-3.82E+01	-3.30E+01	-3.20E+01	-3.32E+01	-2.72E+01	-3.07E+01	-3.67E+01	-3.21E+01
-3.47E+01	-3.52E+01	-4.01E+01	-3.58E+01	-5.99E+01	-6.00E+01	-3.11E+01	-2.62E+01	-2.67E+01	-2.13E+01	-2.16E+01	-2.02E+01	-1.85E+01	-2.03E+01	-2.05E+01	-2.64E+01	-3.00E+01	-3.82E+01	-3.30E+01	-3.20E+01	-3.32E+01	-2.72E+01	-3.07E+01	-3.67E+01	-3.21E+01
-3.47E+01	-3.52E+01	-4.01E+01	-3.58E+01	-5.99E+01	-6.00E+01	-3.11E+01	-2.62E+01	-2.67E+01	-2.13E+01	-2.16E+01	-2.02E+01	-1.85E+01	-2.03E+01	-2.05E+01	-2.64E+01	-3.00E+01	-3.82E+01	-3.30E+01	-3.20E+01	-3.32E+01	-2.72E+01	-3.07E+01	-3.67E+01	-3.21E+01
-3.47E+01	-3.52E+01	-4.01E+01	-3.58E+01	-5.99E+01	-6.00E+01	-3.11E+01	-2.62E+01	-2.67E+01	-2.13E+01	-2.16E+01	-2.02E+01	-1.85E+01	-2.03E+01	-2.05E+01	-2.64E+01	-3.00E+01	-3.82E+01	-3.30E+01	-3.20E+01	-3.32E+01	-2.72E+01	-3.07E+01	-3.67E+01	-3.21E+01
-3.47E+01	-3.52E+01	-4.01E+01	-3.58E+01	-5.99E+01	-6.00E+01	-3.11E+01	-2.62E+01	-2.67E+01	-2.13E+01	-2.16E+01	-2.02E+01	-1.85E+01	-2.03E+01	-2.05E+01	-2.64E+01	-3.00E+01	-3.82E+01	-3.30E+01	-3.20E+01	-3.32E+01	-2.72E+01	-3.07E+01	-3.67E+01	-3.21E+01
-3.47E+01	-3.52E+01	-4.01E+01	-3.58E+01	-5.99E+01	-6.00E+01	-3.11E+01	-2.62E+01	-2.67E+01	-2.13E+01	-2.16E+01	-2.02E+01	-1.85E+01	-2.03E+01	-2.05E+01	-2.64E+01	-3.00E+01	-3.82E+01	-3.30E+01	-3.20E+01	-3.32E+01	-2.72E+01	-3.07E+01	-3.67E+01	-3.21E+01
-3.47E+01	-3.52E+01	-4.01E+01	-3.58E+01	-5.99E+01	-6.00E+01	-3.11E+01	-2.62E+01	-2.67E+01	-2.13E+01	-2.16E+01	-2.02E+01	-1.85E+01	-2.03E+01	-2.05E+01	-2.64E+01	-3.00E+01	-3.82E+01	-3.30E+01	-3.20E+01	-3.32E+01	-2.72E+01	-3.07E+01	-3.67E+01	-3.21E+01
-3.47E+01	-3.52E+01	-4.01E+01	-3.58E+01	-5.99E+01	-6.00E+01	-3.11E+01	-2.62E+01	-2.67E+01	-2.13E+01	-2.16E+01	-2.02E+01	-1.85E+01	-2.03E+01	-2.05E+01	-2.64E+01	-3.00E+01	-3.82E+01	-3.30E+01	-3.20E+01	-3.32E+01	-2.72E+01	-3.07E+01	-3.67E+01	-3.21E+01
-3.47E+01	-3.52E+01	-4.01E+01	-3.58E+01	-5.99E+01	-6.00E+01	-3.11E+01	-2.62E+01	-2.67E+01	-2.13E+01	-2.16E+01	-2.02E+01	-1.85E+01	-2.03E+01	-2.05E+01	-2.64E+01	-3.00E+01	-3.82E+01	-3.30E+01	-3.20E+01	-3.32E+01	-2.72E+01	-3.07E+01	-3.67E+01	-3.21E+01
-3.47E+01	-3.52E+01	-4.01E+01	-3.58E+01	-5.99E+01	-6.00E+01	-3.11E+01	-2.62E+01	-2.67E+01	-2.13E+01	-2.16E+01	-2.02E+01	-1.85E+01	-2.03E+01	-2.05E+01	-2.64E+01	-3.00E+01	-3.82E+01	-3.30E+01	-3.20E+01	-3.32E+01	-2.72E+01	-3.07E+01	-3.67E+01	-3.21E+01
-3.47E+01	-3.52E+01	-4.01E+01	-3.58E+01	-5.99E+01	-6.00E+01	-3.11E+01	-2.62E+01	-2.67E+01	-2.13E+01	-2.16E+01	-2.02E+01	-1.85E+01	-2.03E+01	-2.05E+01	-2.64E+01	-3.00E+01	-3.82E+01	-3.30E+01	-3.20E+01	-3.32E+01	-2.72E+01	-3.07E+01	-3.67E+01	-3.21E+01
-3.47E+01	-3.52E+01	-4.01E+01	-3.58E+01	-5.99E+01	-6.00E+01	-3.11E+01	-2.62E+01	-2.67E+01	-2.13E+01	-2.16E+01	-2.02E+01	-1.85E+01	-2.03E+01	-2.05E+01	-2.64E+01	-3.00E+01	-3.82E+01	-3.30E+01	-3.20E+01	-3.32E+01	-2.72E+01	-3.07E+01	-3.67E+01	-3.21E+01
-3.47E+01	-3.52E+01	-4.01E+01	-3.58E+01	-5.99E+01	-6.00E+01	-3.11E+01	-2.62E+01	-2.67E+01	-2.13E+01	-2.16E+01	-2.02E+01	-1.85E+01	-2.03E+01	-2.05E+01	-2.64E+01	-3.00E+01	-3.82E+01	-3.30E+01	-3.20E+01	-3.32E+01	-2.72E+01	-3.07E+01	-3.67E+01	-3.21E+01
-3.47E+01	-3.52E+01	-4.01E+01	-3.58E+01	-5.99E+01	-6.00E+01	-3.11E+01	-2.62E+01	-2.67E+01	-2.13E+01	-2.16E+01	-2.02E+01	-1.85E+01	-2.03E+01	-2.05E+01	-2.64E+01	-3.00E+01	-3.82E+01	-3.30E+01	-3.20E+01	-3.32E+01	-2.72E+01	-3.07E+01	-3.67E+01	-3.21E+01
-3.47E+01	-3.52E+01	-4.01E+01	-3.58E+01	-5.99E+01	-6.00E+01	-3.11E+01	-2.62E+01	-2.67E+01	-2.13E+01	-2.16E+01	-2.02E+01	-1.85E+01	-2.03E+01	-2.05E+01	-2.64E+01	-3.00E+01	-3.82E+01	-3.30E+01	-3.20E+01	-3.32E+01	-2.72E+01	-3.07E+01	-3.67E+01	-3.21E+01
-3.47E+01	-3.52E+01	-4.01E+01	-3.58E+01	-5.99E+01	-6.00E+01	-3.11E+01	-2.62E+01	-2.67E+01	-2.13E+01	-2.16E+01	-2.02E+01	-1.85E+01	-2.03E+01	-2.05E+01	-2.64E+01	-3.00E+01	-3.82E+01	-3.30E+01	-3.20E+01	-3.32E+01	-2.72E+01	-3.07E+01	-3.67E+01	-3.21E+01
-3.47E+01	-3.52E+01	-4.01E+01	-3.58E+01	-5.99E+01	-6.00E+01	-3.11E+01	-2.62E+01	-2.67E+01	-2.13E+01	-2.16E+01	-2.02E+01	-1.85E+01	-2.03E+01	-2.05E+01	-2.64E+01	-3.00E+01	-3.82E+01	-3.30E+01	-3.20E+01	-3.32E+01	-2.72E+01	-3.07E+01	-3.67E+01	-3.21E+01
-3.47E+01	-3.52E+01	-4.01E+01	-3.58E+01	-5.99E+01	-6.00E+01	-3.11E+01	-2.62E+01	-2.67E+01	-2.13E+01	-2.16E+01	-2.02E+01	-1.85E+01	-2.03E+01	-2.05E+01	-2.64E+01	-3.00E+01	-3.82E+01	-3.30E+01	-3.20E+01	-3.32E+01	-2.72E+01	-3.07E+01	-3.67E+01	-3.21E+01
-3.47E+01	-3.52E+01	-4.01E+01	-3.58E+01	-5.99E+01	-6.00E+01	-3.11E+01	-2.62E+01	-2.67E+01	-2.13E+01	-2.16E+01	-2.02E+01	-1.85E+01	-2.03E+01	-2.05E+01	-2.64E+01	-3.00E+01	-3.82E+01	-3.30E+01	-3.20E+01	-3.32E+01	-2.72E+01	-3.07E+01	-3.67E+01	-3.21E+01
-3.47E+01	-3.52E+01	-4.01E+01	-3.58E+01	-5.99E+01	-6.00E+01	-3.11E+01	-2.62E+01	-2.67E+01	-2.13E+01	-2.16E+01	-2.02E+01	-1.85E+01	-2.03E+01	-2.05E+01	-2.64E+01	-3.00E+01	-3.82E+01	-3.30E+01	-3.20E+01	-3.32E+01	-2.72E+01	-3.07E+01	-3.67E+01	-3.21E+01
-3.47E+01	-3.52E+01	-4.01E+01	-3.58E+01	-5.99E+01	-6.00E+01	-3.11E+01	-2.62E+01	-2.67E+01	-2.13E+01	-2.16E+01	-2.02E+01	-1.85E+01	-2.03E+01	-2.05E+01	-2.64E+01	-3.00E+01	-3.82E+01	-3.30E+01	-3.20E+01	-3.32E+01	-2.72E+01	-3.07E+01	-3.67E+01	-3.21E+01
-3.47E+01	-3.52E+01	-4.01E+01	-3.58E+01	-5.99E+01	-6.00E+01	-3.11E+01	-2.62E+01	-2.67E+01	-2.13E+01	-2.16E+01	-2.02E+01	-1.85E+01	-2.03E+01	-2.05E+01	-2.64E+01	-3.00E+01	-3.82E+01	-3.30E+01	-3.20E+01	-3.32E+01	-2.72E+01	-3.07E+01	-3.67E+01	-3.21E+01
-3.47E+01	-3.52E+01	-4.01E+01	-3.58E+01	-5.99E+01	-6.00E+01	-3.11E+01	-2.62E+01	-2.67E+01	-2.13E+01	-2.16E+01	-2.02E+01	-1.85E+01	-2.03E+01	-2.05E+01	-2.64E+01	-3.00E+01	-3.82E+01	-3.30E+01	-3.20E+01	-3.32E+01	-2.72E+01	-3.07E+01	-3.67E+01	-3.21E+01
-3.47E+01	-3.52E+01	-4.01E+01	-3.58E+01	-5.99E+01	-6.00E+01	-3.11E+01	-2.62E+01	-2.67E+01	-2.13E+01	-2.16E+01	-2.02E+01	-1.85E+01	-2.03E+01	-2.05E+01	-2.64E+01	-3.00E+01	-3.82E+01	-3.30E+01	-3.20E+01	-3.32E+01	-2.72E+01	-3.07E+01	-3.67E+01	-3.21E+01
-3.47E+01	-3.52E+01	-4.01E+01	-3.58E+01	-5.99E+01	-6.00E+01	-3.11E+01	-2.62E+01	-2.67E+01	-2.13E+01	-2.16E+01	-2.02E+01	-1.85E+01	-2.03E+01	-2.05E+01	-2.64E+01	-3.00E+01	-3.82E+01	-3.30E+01	-3.20E+01	-3.32E+01	-2.72E+01	-3.07E+01	-3.67E+01	-3.21E+01
-3.47E+01	-3.52E+01	-4.01E+01	-3.58E+01	-5.99E+01	-6.00E+01	-3.11E+01	-2.62E+01	-2.67E+01	-2.13E+01	-2.16E+01	-2.02E+01	-1.85E+01	-2.03E+01	-2.05E+01	-2.64E+01	-3.00E+01	-3.82E+01	-3.30E+01	-3.20E+01	-3.32E+01	-2.72E+01	-3.07E+01	-3.67E+01	-3.21E+01
-3.47E+01	-3.52E+01	-4.01E+01	-3.58E+01	-5.99E+01	-6.00E+01	-3.11E+01	-2.62E+01	-2.67E+01	-2.13E+01	-2.16E+01	-2.02E+01	-1.85E+01	-2.03E+01	-2.05E+01	-2.64E+01	-3.00E+01	-3.82E+01	-3.30E+01	-3.20E+01	-3.32E+01	-2.72E+01	-3.07E+01	-3.67E+01	-3.21E+01
-3.47E+01	-3.52E+01	-4.01E+01	-3.58E+01	-5.99E+01	-6.00E+01	-3.11E+01	-2.62E+01	-2.67E+01	-2.13E+01	-2.16E+01	-2.02E+01	-1.85E+01	-2.03E+01	-2.05E+01	-2.64E+01	-3.00E+01	-3.82E+01	-3.30E+01	-3.20E+01	-3.32E+01	-2.72E+01	-3.07E+01	-3.67E+01	-3.21E+01
-3.47E+01	-3.52E+01	-4.01E+01	-3.58E+01	-5.99E+01	-6.00E+01	-3.11E+01	-2.62E+01	-2.67E+01	-2.13E+01	-2.16E+01	-2.02E+01	-1.85E+01	-2.03E+01	-2.05E+01	-2.64E+01	-3.00E+01	-3.82E+01	-3.30E+01	-3.20E+01	-3.32E+01	-2.72E+01	-3.07E+01	-3.67E+01	-3.21E+01
-3.47E+01	-3.52E+01	-4.01E+01	-3.58E+01	-5.99E+01	-6.00E+01	-3.11E+01	-2.62E+01	-2.67E+01	-2.13E+01	-2.16E+01	-2.02E+01	-1.85E+01	-2.03E+01	-2.05E+01	-2.64E+01	-3.00E+01	-3.82E+01	-3.30E+01	-3.20E+01	-3.32E+01	-2.72E+01	-3.07E+01	-3.67E+01	-3.21E+01
-3.47E+01	-3.52E+01	-4.01E+01	-3.58E+01	-5.99E+01	-6.00E+01	-3.11E+01	-2.62E+01	-2.67E+01	-2.13E+01	-2.16E+01	-2.02E+01	-1.85E+01	-2.03E+01	-2.05E+01	-2.64E+01	-3.00E+01	-3.82E+01	-3.30E+01	-3.20E+01	-3.32E+01	-2.72E+01	-3.07E+01	-3.67E+01	-3.21E+01
-3.47E+01	-3.52E+01	-4.01E+01	-3.58E+01	-5.99E+01	-6.00E+01	-3.11E+01	-2.62E+01	-2.67E+01	-2.13E+01	-2.16E+01	-2.02E+01	-1.85E+01	-2.03E+01	-2.05E+01	-2.64E+01	-3.00E+01	-3.82E+01	-3.30E+01	-3.20E+01	-3.32E+01	-2.72E+01	-3.07E+01	-3.67E+01	-3.21E+01
-3.47E+01	-3.52E+01	-4.01E+01	-3.58E+01	-5.99E+01	-6.00E+01	-3.11E+01	-2.62E+01	-2.67E+01	-2.13E+01	-2.16E+01	-2.02E+01	-1.85E+01	-2.03E+01	-2.05E+01	-2.64E+01	-3.00E+01	-3.82E+01	-3.30E+01	-3.20E+01	-3.32E+01	-2.72E+01	-3.07E+01	-3.67E+01	-3.21E+01
-3.47E+01	-3.52E+01	-4.01E+01	-3.58E+01	-5.99E+01	-6.00E+01	-3.11E+01	-2.62E+01	-2.67E+01	-2.13E+01	-2.16E+01	-2.02E+01	-1.85E+01	-2.03E+01	-2.05E+01	-2.64E+01	-3.00E+01	-3.82E+01	-3.30E+01	-3.20E+01	-3.32E+01	-2.72E+01	-3.07E+01	-3.67E+01	-3.21E+01
-3.47E+01	-3.52E+01	-4.01E+01	-3.58E+01	-5.99E+01	-6.00E+01	-3.11E+01	-2.62E+01	-2.67E+01	-2.13E+01	-2.16E+01	-2.02E+01	-1.85E+01	-2.03E+01	-2.05E+01	-2.64E+01	-3.00E+01	-3.82E+01	-3.30E+01	-3.20E+01	-3.32E+01	-2.72E+01	-3.07E+01	-3.67E+01	-3.21E+01
-3.47E+01	-3.52E+01	-4.01E+01	-3.58E+01	-5.99E+01	-6.00E+01	-3.11E+01	-2.62E+01	-2.67E+01	-2.13E+01	-2.16E+01	-2.02E+01	-1.85E+01	-2.03E+01	-2.05E+01	-2.64E+01	-3.00E+01	-3.82E+01	-3.30E+01	-3.20E+01	-3.32E+01	-2.72E+01	-3.07E+01	-3.67E+01	-3.21E+01
-3.47E+01	-3.52E+01	-4.01E+01	-3.58E+01	-5.99E+01	-6.00E+01	-3.11E+01	-2.62E+01	-2.67E+01	-2.13E+01	-2.16E+01	-2.02E+01	-1.85E+01	-2.03E+01	-2.05E+01	-2.64E+01	-3.00E+01	-3.82E+01	-3.30E+01	-3.20E+01	-3.32E+01	-2.72E+01	-3.07E+01	-3.67E+01	-3.21E+01
-3.47E+01	-3.52E+01	-4.01E+01	-3.58E+01	-5.99E+01	-6.00E+01	-3.11E+01	-2.62E+01	-2.67E+01	-2.13E+01	-2.16E+01	-2.02E+01	-1.85E+01	-2.03E+01	-2.05E+01	-2.64E+01	-3.00E+01	-3.82E+01	-3.30E+01	-3.20E+01	-3.32E+01	-2.72E+01	-3.07E+01	-3.67E+01	-3.21E+01
-3.47E+01	-3.52E+01	-4.01E+01	-3.58E+01	-5.99E+01	-6.00E+01	-3.11E+01	-2.62E+01	-2.67E+01	-2.13E+01	-2.16E+01	-2.02E+01	-1.85E+01	-2.03E+01	-2.05E+01	-2.64E+01	-3.00E+01	-3.82E+01	-3.30E+01	-3.20E+01	-3.32E+01	-2.72E+01	-3.07E+01	-3.67E+01	-3.21E+01
-3.47E+01	-3.52E+01	-4.01E+01	-3.58E+01	-5.99E+01	-6.00E+01	-3.11E+01	-2.62E+01	-2.67E+01	-2.13E+01	-2.16E+01	-2.02E+01	-1.85E+01	-2.03E+01	-2.05E+01	-2.64E+01	-3.00E+01	-3.82E+01	-3.30E+01	-3.20E+01	-3.32E+01	-2.72E+01	-3.07E+01	-3.67E+01	-3.21E+01
-3.47E+01	-3.52E+01	-4.01E+01	-3.58E+01	-5.99E+01	-6.00E+01	-3.11E+01	-2.62E+01	-2.67E+01	-2.13E+01	-2.16E+01	-2.02E+01	-1.85E+01	-2.03E+01	-2.05E+01	-2.64E+01	-3.00E+01	-3.82E+01	-3.30E+01	-3.20E+01	-3.32E+01	-2.72E+01	-3.07E+01	-3.67E+01	-3.21E+01
-3.47E+01	-3.52E+01	-4.01E+01	-3.58E+01	-5.99E+01	-6.00E+01	-3.11E+01	-2.62E+01	-2.67E+01	-2.13E+01	-2.16E+01	-2.02E+01	-1.85E+01	-2.03E+01	-2.05E+01	-2.64E+01	-3.00E+01	-3.82E+01	-3.30E+01	-3.20E+01	-3.32E+01	-2.72E+01	-3.07E+01	-3.67E+01	-3.21E+01
-3.47E+01	-3.52E+01	-4.01E+01	-3.58E+01	-5.99E+01	-6.00E+01	-3.11E+01	-2.62E+01	-2.67E+01	-2.13E+01	-2.16E+01	-2.02E+01	-1.85E+01	-2.03E+01	-2.05E+01	-2.64E+01	-3.00E+01	-3.82E+01	-3.30E+01	-3.20E+01	-3.32E+01	-2.72E+01	-3.07E+01	-3.67E+01	-3.21E+01
-3.47E+01	-3.52E+01	-4.01E+01	-3.58E+01	-5.99E+01	-6.00E+01	-3.11E+01	-2.62E+01	-2.67E+01	-2.13E+01	-2.16E+01	-2.02E+01	-1.85E+01	-2.03E+01	-2.05E+01	-2.64E+01	-3.00E+01	-3.82E+01	-3.30E+01	-3.20E+01	-3.32E+01	-2.72E+01	-3.07E+01	-3.67E+01	-3.21E+01
-3.47E+01	-3.52E+01	-4.01E+01	-3.58E+01	-5.99E+01	-6.00E+01	-3.11E+01	-2.62E+01	-2.67E+01	-2.13E+01	-2.16E+01	-2.02E+01	-1.85E+01	-2.03E+01	-2.05E+01	-2.64E+01	-3.00E+01	-3.82E+01	-3.30E+01	-3.20E+01	-3.32E+01	-2.72E+01	-3.07E+01	-3.67E+01	-3.21E+01
-3.47E+01	-3.52E+01	-4.01E+01	-3.58E+01	-5.99E+01	-6.00E+01	-3.11E+01	-2.62E+01	-2.67E+01	-2.13E+01	-2.16E+01	-2.02E+01	-1.85E+01	-2.03E+01	-2.05E+01	-2.64E+01	-3.00E+01	-3.82E+01	-3.30E+01	-3.20E+01	-3.32E+01	-2.72E+01	-3.07E+01	-3.67E+01	-3.21E+01
-3.47E+01	-3.52E+01	-4.01E+01	-3.58E+01	-5.99E+01	-6.00E+01	-3.11E+01	-2.62E+01	-2.67E+01	-2.13E+01	-2.16E+01	-2.02E+01	-1.85E+01	-2.03E+01	-2.05E+01	-2.64E+01	-3.00E+01	-3.82E+01	-3.30E+01	-3.20E+01	-3.32E+01	-2.72E+01	-3.07E+01	-3.67E+01	-3.21E+01
-3.47E+01	-3.52E+01	-4.01E+01	-3.58E+01	-5.99E+01	-6.00E+01	-3.11E+01	-2.62E+01	-2.67E+01	-2.13E+01	-2.16E+01	-2.02E+01	-1.85E+01	-2.03E+01	-2.05E+01	-2.64E+01	-3.00E+01	-3.82E+01	-3.30E+01	-3.20E+01	-3.32E+01	-2.72E+01	-3.07E+01	-3.67E+01	-3.21E+01
-3.47E+01	-3.52E+01	-4.01E+01	-3.58E+01	-5.99E+01	-6.00E+01	-3.11E+01	-2.62E+01	-2.67E+01	-2.13E+01	-2.16E+01	-2.02E+01	-1.85E+01	-2.03E+01	-2.05E+01	-2.64E+01	-3.00E+01	-3.82E+01	-3.30E+01	-3.20E+01	-3.32E+01	-2.72E+01	-3.07E+01	-3.67E+01	-3.21E+01
-3.47E+01	-3.52E+01	-4.01E+01	-3.58E+01	-5.99E+01	-6.00E+01	-3.11E+01	-2.62E+01	-2.67E+01	-2.13E+01	-2.16E+01	-2.02E+01	-1.85E+01	-2.03E+01	-2.05E+01	-2.64E+01	-3.00E+01	-3.82E+01	-3.30E+01	-3.20E+01	-3.32E+01	-2.72E+01	-3.07E+01	-3.67E+01	-3.21E+01
-3.47E+01	-3.52E+01	-4.01E+01	-3.58E+01	-5.99E+01	-6.00E+01	-3.11E+01	-2.62E+01	-2.67E+01	-2.13E+01	-2.16E+01	-2.02E+01	-1.85E+01	-2.03E+01	-2.05E+01	-2.64E+01	-3.00E+01	-3.82E+01	-3.30E+01	-3.20E+01	-3.32E+01	-2.72E+01	-3.07E+01	-3.67E+01	-3.21E+01
-3.47E+01	-3.52E+01	-4.01E+01	-3.58E+01	-5.99E+01	-6.00E+01	-3.11E+01	-2.62E+01	-2.67E+01	-2.13E+01	-2.16E+01	-2.02E+01	-1.85E+01	-2.03E+01	-2.05E+01	-2.64E+01	-3.00E+01	-3.82E+01	-3.30E+01	-3.20E+01	-3.32E+01	-2.72E+01	-3.07E+01	-3.67E+01	-3.21E+01
-3.47E+01	-3.52E+01	-4.01E+01	-3.58E+01	-5.99E+01	-6.00E+01	-3.11E+01	-2.62E+01	-2.67E+01	-2.13E+01	-2.16E+01	-2.02E+01	-1.85E+01	-2.03E+01	-2.05E+01	-2.64E+01	-3.00E+01	-3.82E+01	-3.30E+01	-3.20E+01	-3.32E+01	-2.72E+01	-3.07E+01	-3.67E+01	-3.21E+01
-3.47E+01	-3.52E+01	-4.01E+01	-3.58E+01	-5.99E+01	-6.00E+01	-3.11E+01	-2.62E+01	-2.67E+01	-2.13E+01	-2.16E+01	-2.02E+01	-1.85E+01	-2.03E+01	-2.05E+01	-2.64E+01	-3.00E+01	-3.82E+01	-3.30E+01	-3.20E+01	-3.32E+01	-2.72E+01	-3.07E+01	-3.67E+01	-3.21E+01
-3.47E+01	-3.52E+01	-4.01E+01	-3.58E+01	-5.99E+01	-6.00E+01	-3.11E+01	-2.62E+01	-2.67E+01	-2.13E+01	-2.16E+01	-2.02E+01	-1.85E+01	-2.03E+01	-2.05E+01	-2.64E+01	-3.00E+01	-3.82E+01	-3.30E+01	-3.20E+01	-3.32E+01	-2.72E+01	-3.07E+01	-3.67E+01	-3.21E+01
-3.47E+01	-3.52E+01	-4.01E+01	-3.58E+01	-5.99E+01	-6.00E+01	-3.11E+01	-2.62E+01	-2.67E+01	-2.13E+01	-2.16E+01	-2.02E+01	-1.85E+01	-2.03E+01	-2.05E+01	-2.64E+01	-3.00E+01	-3.82E+01	-3.30E+01	-3.20E+01	-3.32E+01	-2.72E+01	-3.07E+01	-3.67E+01	-3.21E+01
-3.47E+01	-3.52E+01	-4.01E+01	-3.58E+01	-5.99E+01	-6.00E+01	-3.11E+01	-2.62E+01	-2.67E+01	-2.13E+01	-2.16E+01	-2.02E+01	-1.85E+01	-2.03E+01	-2.05E+01	-2.64E+01	-3.00E+01	-3.82E+01	-3.30E+01	-3.20E+01	-3.32E+01	-2.72E+01	-3.07E+01	-3.67E+01	-3.21E+01
-3.47E+01	-3.52E+01	-4.01E+01	-3.58E+01	-5.99E+01	-6.00E+01	-3.11E+01	-2.62E+01	-2.67E+01	-2.13E+01	-2.16E+01	-2.02E+01	-1.85E+01	-2.03E+01	-2.05E+01	-2.64E+01	-3.00E+01	-3.82E+01	-3.30E+01	-3.20E+01	-3.32E+01	-2.72E+01	-3.07E+01	-3.67E+01	-3.21E+01
-3.47E+01	-3.52E+01	-4.01E+01	-3.58E+01	-5.99E+01	-6.00E+01	-3.11E+01	-2.62E+01	-2.67E+01	-2.13E+01	-2.16E+01	-2.02E+01	-1.85E+01	-2.03E+01	-2.05E+01	-2.64E+01	-3.00E+01	-3.82E+01	-3.30E+01	-3.20E+01	-3.32E+01	-2.72E+01	-3.07E+01	-3.67E+01	-3.21E+01
-3.47E+01	-3.52E+01	-4.01E+01	-3.58E+01	-5.99E+01	-6.00E+01	-3.11E+01	-2.62E+01	-2.67E+01	-2.13E+01	-2.16E+01	-2.02E+01	-1.85E+01	-2.03E+01	-2.05E+01	-2.64E+01	-3.00E+01	-3.82E+01	-3.30E+01	-3.20E+01	-3.32E+01	-2.72E+01	-3.07E+01	-3.67E+01	-3.21E+01
-3.47E+01	-3.52E+01	-4.01E+01	-3.58E+01	-5.99E+01	-6.00E+01	-3.11E+01	-2.62E+01	-2.67E+01	-2.13E+01	-2.16E+01	-2.02E+01	-1.85E+01	-2.03E+01	-2.05E+01	-2.64E+01	-3.00E+01	-3.82E+01	-3.30E+01	-3.20E+01	-3.32E+01	-2.72E+01	-3.07E+01	-3.67E+01	-3.21E+01
-3.47E+01	-3.52E+01	-4.01E+01	-3.58E+01	-5.99E+01	-6.00E+01	-3.11E+01	-2.62E+01	-2.67E+01	-2.13E+01	-2.16E+01	-2.02E+01	-1.85E+01	-2.03E+01	-2.05E+01	-2.64E+01	-3.00E+01	-3.82E+01	-3.30E+01	-3.20E+01	-3.32E+01	-2.72E+01	-3.07E+01	-3.67E+01	-3.21E+01
-3.47E+01	-3.52E+01	-4.01E+01	-3.58E+01	-5.99E+01	-6.00E+01	-3.11E+01	-2.62E+01	-2.67E+01	-2.13E+01	-2.16E+01	-2.02E+01	-1.85E+01	-2.03E+01	-2.05E+01	-2.64E+01	-3.00E+01	-3.82E+01	-3.30E+01	-3.20E+01	-3.32E+01	-2.72E+01	-3.07E+01	-3.67E+01	-3.21E+01
-3.47E+01	-3.52E+01	-4.01E+01	-3.58E+01	-5.99E+01	-6.00E+01	-3.11E+01	-2.62E+01	-2.67E+01	-2.13E+01	-2.16E+01	-2.02E+01	-1.85E+01	-2.03E+01	-2.05E+01	-2.64E+01	-3.00E+01	-3.82E+01	-3.30E+01	-3.20E+01	-3.32E+01	-2.72E+01	-3.07E+01	-3.67E+01	-3.21E+01
-3.47E+01	-3.52E+01	-4.01E+01	-3.58E+01	-5.99E+01	-6.00E+01	-3.11E+01	-2.62E+01	-2.67E+01	-2.13E+01	-2.16E+01	-2.02E+01	-1.85E+01	-2.03E+01	-2.05E+01	-2.64E+01	-3.00E+01	-3.82E+01	-3.30E+01	-3.20E+01	-3.32E+01	-2.72E+01	-3.07E+01	-3.67E+01	-3.21E+01
-3.47E+01	-3.52E+01	-4.01E+01	-3.58E+01	-5.99E+01	-6.00E+01	-3.11E+01	-2.62E+01	-2.67E+01	-2.13E+01	-2.16E+01	-2.02E+01	-1.85E+01	-2.03E+01	-2.05E+01	-2.64E+01	-3.00E+01	-3.82E+01	-3.30E+01	-3.20E+01	-3.32E+01	-2.72E+01	-3.07E+01	-3.67E+01	-3.21E+01
-3.47E+01	-3.52E+01	-4.01E+01	-3.58E+01	-5.99E+01	-6.00E+01	-3.11E+01	-2.62E+01	-2.67E+01	-2.13E+01	-2.16E+01	-2.02E+01	-1.85E+01	-2.03E+01	-2.05E+01	-2.64E+01	-3.00E+01	-3.82E+01	-3.30E+01	-3.20E+01	-3.32E+01	-2.72E+01	-3.07E+01	-3.67E+01	-3.21E+01
-3.47E+01	-3.52E+01	-4.01E+01	-3.58E+01	-5.99E+01	-6.00E+01	-3.11E+01	-2.62E+01	-2.67E+01	-2.13E+01	-2.16E+01	-2.02E+01	-1.85E+01	-2.03E+01	-2.05E+01	-2.64E+01	-3.00E+01	-3.82E+01	-3.30E+01	-3.20E+01	-3.32E+01	-2.72E+01	-3.07E+01	-3.67E+01	-3.21E+01
-3.47E+01	-3.52E+01	-4.01E+01	-3.58E+01	-5.99E+01	-6.00E+01	-3.11E+01	-2.62E+01	-2.67E+01	-2.13E+01	-2.16E+01	-2.02E+01	-1.85E+01	-2.03E+01	-2.05E+01	-2.64E+01	-3.00E+01	-3.82E+01	-3.30E+01	-3.20E+01	-3.32E+01	-2.72E+01	-3.07E+01	-3.67E+01	-3.21E+01
-3.47E+01	-3.52E+01	-4.01E+01	-3.58E+01	-5.99E+01	-6.00E+01	-3.11E+01	-2.62E+01	-2.67E+01	-2.13E+01	-2.16E+01	-2.02E+01	-1.85E+01	-2.03E+01	-2.05E+01	-2.64E+01	-3.00E+01	-3.82E+01	-3.30E+01	-3.20E+01	-3.32E+01	-2.72E+01	-3.07E+01	-3.67E+01	-3.21E+01
-3.47E+01	-3.52E+01	-4.01E+01	-3.58E+01	-5.99E+01	-6.00E+01	-3.11E+01	-2.62E+01	-2.67E+01	-2.13E+01	-2.16E+01	-2.02E+01	-1.85E+01	-2.03E+01	-2.05E+01	-2.64E+01	-3.00E+01	-3.82E+01	-3.30E+01	-3.20E+01	-3.32E+01	-2.72E+01	-3.07E+01	-3.67E+01	-3.21E+01
-3.47E+01	-3.52E+01	-4.01E+01	-3.58E+01	-5.99E+01	-6.00E+01	-3.11E+01	-2.62E+01	-2.67E+01	-2.13E+01	-2.16E+01	-2.02E+01	-1.85E+01	-2.03E+01	-2.05E+01	-2.64E+01	-3.00E+01	-3.82E+01	-3.30E+01	-3.20E+01	-3.32E+01	-2.72E+01	-3.07E+01	-3.67E+01	-3.21E+01
-3.47E+01	-3.52E+01	-4.01E+01	-3.58E+01	-5.99E+01	-6.00E+01	-3.11E+01	-2.62E+01	-2.67E+01	-2.13E+01	-2.16E+01	-2.02E+01	-1.85E+01	-2.03E+01	-2.05E+01	-2.64E+01	-3.00E+01	-3.82E+01	-3.30E+01	-3.20E+01	-3.32E+01	-2.72E+01	-3.07E+01	-3.67E+01	-3.21E+01
-3.47E+01	-3.52E+01	-4.01E+01	-3.58E+01	-5.99E+01	-6.00E+01	-3.11E+01	-2.62E+01	-2.67E+01	-2.13E+01	-2.16E+01	-2.02E+01	-1.85E+01	-2.03E+01	-2.05E+01	-2.64E+01	-3.00E+01	-3.82E+01	-3.30E+01	-3.20E+01	-3.32E+01	-2.72E+01	-3.07E+01	-3.67E+01	-3.21E+01
-3.47E+01	-3.52E+01	-4.01E+01	-3.58E+01	-5.99E+01	-6.00E+01	-3.11E+01	-2.62E+01	-2.67E+01	-2.13E+01	-2.16E+01	-2.02E+01	-1.85E+01	-2.03E+01	-2.05E+01	-2.64E+01	-3.00E+01	-3.82E+01	-3.30E+01	-3.20E+01	-3.32E+01	-2.72E+01	-3.07E+01	-3.67E+01	-3.21E+01
-3.47E+01	-3.52E+01	-4.01E+01	-3.58E+01	-5.99E+01	-6.00E+01	-3.11E+01	-2.62E+01	-2.67E+01	-2.13E+01	-2.16E+01	-2.02E+01	-1.85E+01	-2.03E+01	-2.05E+01	-2.64E+01	-3.00E+01	-3.82E+01	-3.30E+01	-3.20E+01	-3.32E+01	-2.72E+01	-3.07E+01	-3.67E+01	-3.21E+01
-3.47E+01	-3.52E+01	-4.01E+01	-3.58E+01	-5.99E+01	-6.00E+01	-3.11E+01	-2.62E+01	-2.67E+01	-2.13E+01	-2.16E+01	-2.02E+01	-1.85E+01	-2.03E+01	-2.05E+01	-2.64E+01	-3.00E+01	-3.82E+01	-3.30E+01	-3.20E+01	-3.32E+01	-2.72E+01	-3.07E+01	-3.67E+01	-3.21E+01
-3.47E+01	-3.52E+01	-4.01E+01	-3.58E+01	-5.99E+01	-6.00E+01	-3.11E+01	-2.62E+01	-2.67E+01	-2.13E+01	-2.16E+01	-2.02E+01	-1.85E+01	-2.03E+01	-2.05E+01	-2.64E+01	-3.00E+01	-3.82E+01	-3.30E+01	-3.20E+01	-3.32E+01	-2.72E+01	-3.07E+01	-3.67E+01	-3.21E+01
-3.47E+01	-3.52E+01	-4.01E+01	-3.58E+01	-5.99E+01	-6.00E+01	-3.11E+01	-2.62E+01	-2.67E+01	-2.13E+01	-2.16E+01	-2.02E+01	-1.85E+01	-2.03E+01	-2.05E+01	-2.64E+01	-3.00E+01	-3.82E+01	-3.30E+01	-3.20E+01	-3.32E+01	-2.72E+01	-3.07E+01	-3.67E+01	-3.21E+01
-3.47E+01	-3.52E+01	-4.01E+01	-3.58E+01	-5.99E+01	-6.00E+01	-3.11E+01	-2.62E+01	-2.67E+01	-2.13E+01	-2.16E+01	-2.02E+01	-1.85E+01	-2.03E+01	-2.05E+01	-2.64E+01	-3.00E+01	-3.82E+01	-3.30E+01	-3.20E+01	-3.32E+01	-2.72E+01	-3.07E+01	-3.67E+01	-3.21E+01
-3.47E+01	-3.52E+01	-4.01E+01	-3.58E+01	-5.99E+01	-6.00E+01	-3.11E+01	-2.62E+01	-2.67E+01	-2.13E+01	-2.16E+01	-2.02E+01	-1.85E+01	-2.03E+01	-2.05E+01	-2.64E+01	-3.00E+01	-3.82E+01	-3.30E+01	-3.20E+01	-3.32E+01	-2.72E+01	-3.07E+01	-3.67E+01	-3.21E+01
-3.47E+01	-3.52E+01	-4.01E+01	-3.58E+01	-5.99E+01	-6.00E+01	-3.11E+01	-2.62E+01	-2.67E+01	-2.13E+01	-2.16E+01	-2.02E+01	-1.85E+01	-2.03E+01	-2.05E+01	-2.64E+01	-3.00E+01	-3.82E+01	-3.30E+01	-3.20E+01	-3.32E+01	-2.72E+01	-3.07E+01	-3.67E+01	-3.21E+01
-3.47E+01	-3.52E+01	-4.01E+01	-3.58E+01	-5.99E+01	-6.00E+01	-3.11E+01	-2.62E+01	-2.67E+01	-2.13E+01	-2.16E+01	-2.02E+01	-1.85E+01	-2.03E+01	-2.05E+01	-2.64E+01	-3.00E+01	-3.82E+01	-3.30E+01	-3.20E+01	-3.32E+01	-2.72E+01	-3.07E+01	-3.67E+01	-3.21E+01
-3.47E+01	-3.52E+01	-4.01E+01	-3.58E+01	-5.99E+01	-6.00E+01	-3.11E+01	-2.62E+01	-2.67E+01	-2.13E+01	-2.16E+01	-2.02E+01	-1.85E+01	-2.03E+01	-2.05E+01	-2.64E+01	-3.00E+01	-3.82E+01	-3.30E+01	-3.20E+01	-3.32E+01	-2.72E+01	-3.07E+01	-3.67E+01	-3.21E+01
-3.47E+01	-3.52E+01	-4.01E+01	-3.58E+01	-5.99E+01	-6.00E+01	-3.11E+01	-2.62E+01	-2.67E+01	-2.13E+01	-2.16E+01	-2.02E+01	-1.85E+01	-2.03E+01	-2.05E+01	-2.64E+01	-3.00E+01	-3.82E+01	-3.30E+01	-3.20E+01	-3.32E+01	-2.72E+01	-3.07E+01	-3.67E+01	-3.21E+01
-3.47E+01	-3.52E+01	-4.01E+01	-3.58E+01	-5.99E+01	-6.00E+01	-3.11E+01	-2.62E+01	-2.67E+01	-2.13E+01	-2.16E+01	-2.02E+01	-1.85E+01	-2.03E+01	-2.05E+01	-2.64E+01	-3.00E+01	-3.82E+01	-3.30E+01	-3.20E+01	-3.32E+01	-2.72E+01	-3.07E+01	-3.67E+01	-3.21E+01
-3.47E+01	-3.52E+01	-4.01E+01	-3.58E+01	-5.99E+01	-6.00E+01	-3.11E+01	-2.62E+01	-2.67E+01	-2.13E+01	-2.16E+01	-2.02E+01	-1.85E+01	-2.03E+01	-2.05E+01	-2.64E+01	-3.00E+01	-3.82E+01	-3.30E+01	-3.20E+01	-3.32E+01	-2.72E+01	-3.07E+01	-3.67E+01	-3.21E+01
-3.47E+01	-3.52E+01	-4.01E+01	-3.58E+01	-5.99E+01	-6.00E+01	-3.11E+01	-2.62E+01	-2.67E+01	-2.13E+01	-2.16E+01	-2.02E+01	-1.85E+01	-2.03E+01	-2.05E+01	-2.64E+01	-3.00E+01	-3.82E+01	-3.30E+01	-3.20E+01	-3.32E+01	-2.72E+01	-3.07E+01	-3.67E+01	-3.21E+01
-3.47E+01	-3.52E+01	-4.01E+01	-3.58E+01	-5.99E+01	-6.00E+01	-3.11E+01	-2.62E+01	-2.67E+01	-2.13E+01	-2.16E+01	-2.02E+01	-1.85E+01	-2.03E+01	-2.05E+01	-2.64E+01	-3.00E+01	-3.82E+01	-3.30E+01	-3.20E+01	-3.32E+01	-2.72E+01	-3.07E+01	-3.67E+01	-3.21E+01
-3.47E+01	-3.52E+01	-4.01E+01	-3.58E+01	-5.99E+01	-6.00E+01	-3.11E+01	-2.62E+01	-2.67E+01	-2.13E+01	-2.16E+01	-2.02E+01	-1.85E+01	-2.03E+01	-2.05E+01	-2.64E+01	-3.00E+01	-3.82E+01	-3.30E+01	-3.20E+01	-3.32E+01	-2.72E+01	-3.07E+01	-3.67E+01	-3.21E+01
-3.47E+01	-3.52E+01	-4.01E+01	-3.58E+01	-5.99E+01	-6.00E+01	-3.11E+01	-2.62E+01	-2.67E+01	-2.13E+01	-2.16E+01	-2.02E+01	-1.85E+01	-2.03E+01	-2.05E+01	-2.64E+01	-3.00E+01	-3.82E+01	-3.30E+01	-3.20E+01	-3.32E+01	-2.72E+01	-3.07E+01	-3.67E+01	-3.21E+01
-3.47E+01	-3.52E+01	-4.01E+01	-3.58E+01	-5.99E+01	-6.00E+01	-3.11E+01	-2.62E+01	-2.67E+01	-2.13E+01	-2.16E+01	-2.02E+01	-1.85E+01	-2.03E+01	-2.05E+01	-2.64E+01	-3.00E+01	-3.82E+01	-3.30E+01	-3.20E+01	-3.32E+01	-2.72E+01	-3.07E+01	-3.67E+01	-3.21E+01
-3.47E+01	-3.52E+01	-4.01E+01	-3.58E+01	-5.99E+01	-6.00E+01	-3.11E+01	-2.62E+01	-2.67E+01	-2.13E+01	-2.16E+01	-2.02E+01	-1.85E+01	-2.03E+01	-2.05E+01	-2.64E+01	-3.00E+01	-3.82E+01	-3.30E+01	-3.20E+01	-3.32E+01	-2.72E+01	-3.07E+01	-3.67E+01	-3.21E+01
-3.47E+01	-3.52E+01	-4.01E+01	-3.58E+01	-5.99E+01	-6.00E+01	-3.11E+01	-2.62E+01	-2.67E+01	-2.13E+01	-2.16E+01	-2.02E+01	-1.85E+01	-2.03E+01	-2.05E+01	-2.64E+01	-3.00E+01	-3.82E+01	-3.30E+01	-3.20E+01	-3.32E+01	-2.72E+01	-3.07E+01	-3.67E+01	-3.21E+01
-3.47E+01	-3.52E+01	-4.01E+01	-3.58E+01	-5.99E+01	-6.00E+01	-3.11E+01	-2.62E+01	-2.67E+01	-2.13E+01	-2.16E+01	-2.02E+01	-1.85E+01	-2.03E+01	-2.05E+01	-2.64E+01	-3.00E+01	-3.82E+01	-3.30E+01	-3.20E+01	-3.32E+01	-2.72E+01	-3.07E+01	-3.67E+01	-3.21E+01
-3.47E+01	-3.52E+01	-4.01E+01	-3.58E+01	-5.99E+01	-6.00E+01	-3.11E+01	-2.62E+01	-2.67E+01	-2.13E+01	-2.16E+01	-2.02E+01	-1.85E+01	-2.03E+01	-2.05E+01	-2.64E+01	-3.00E+01	-3.82E+01	-3.30E+01	-3.20E+01	-3.32E+01	-2.72E+01	-3.07E+01	-3.67E+01	-3.21E+01
