# Supplementary material for: Hybrid ARIMA and Neural Network Modelling Applied to Telecommunications in Urban Environments in the Amazon Region
Source: Hindawi journal article supplement (doi:10.1155/2020/2671746), 2020-02-24
Supplement: f1 [file 2671746.f1.zip › 2671746.f1/ekoara1_interp_1.csv]

1.00E+00	2.00E+00	3.00E+00	4.00E+00	5.00E+00	6.00E+00	7.00E+00	8.00E+00	9.00E+00	1.00E+01	1.10E+01	1.20E+01	1.30E+01	1.40E+01	1.50E+01	1.60E+01	1.70E+01	1.80E+01	1.90E+01	2.00E+01	2.10E+01	2.20E+01	2.30E+01	2.40E+01	2.50E+01	2.60E+01	2.70E+01	2.80E+01	2.90E+01	3.00E+01	3.10E+01
6.58E-01	3.05E-01	4.59E-01	5.97E-01	5.55E-01	5.98E-01	5.85E-01	5.90E-01	5.94E-01	6.28E-01	6.74E-01	6.98E-01	7.40E-01	6.45E-01	8.93E-01	1.15E+00	1.00E+00	9.08E-01	8.19E-01	7.85E-01	7.31E-01	6.92E-01	7.36E-01	7.76E-01	8.78E-01	1.06E+00	1.18E+00	1.21E+00	1.45E+00	1.68E+00	1.72E+00
6.72E-01	3.06E-01	4.39E-01	5.67E-01	5.63E-01	5.98E-01	5.85E-01	5.91E-01	5.94E-01	6.31E-01	6.80E-01	7.06E-01	7.51E-01	6.50E-01	9.16E-01	1.17E+00	1.02E+00	9.20E-01	8.26E-01	7.83E-01	7.16E-01	6.66E-01	7.29E-01	7.87E-01	8.84E-01	1.06E+00	1.17E+00	1.21E+00	1.44E+00	1.66E+00	1.70E+00
6.57E-01	3.00E-01	4.49E-01	5.52E-01	5.65E-01	6.03E-01	5.89E-01	5.96E-01	6.00E-01	6.42E-01	6.94E-01	7.18E-01	7.58E-01	6.68E-01	8.99E-01	1.16E+00	1.01E+00	9.16E-01	8.25E-01	7.80E-01	7.09E-01	6.56E-01	7.25E-01	7.88E-01	8.82E-01	1.06E+00	1.17E+00	1.20E+00	1.43E+00	1.65E+00	1.69E+00
6.77E-01	3.45E-01	4.70E-01	4.97E-01	5.48E-01	6.12E-01	5.87E-01	5.98E-01	6.05E-01	6.35E-01	6.74E-01	6.97E-01	7.38E-01	6.48E-01	8.71E-01	1.17E+00	1.01E+00	9.15E-01	8.24E-01	7.79E-01	7.09E-01	6.57E-01	7.23E-01	7.83E-01	8.76E-01	1.05E+00	1.16E+00	1.20E+00	1.43E+00	1.67E+00	1.71E+00
6.66E-01	3.42E-01	4.51E-01	5.14E-01	5.50E-01	6.06E-01	5.84E-01	5.94E-01	6.00E-01	6.33E-01	6.75E-01	6.98E-01	7.39E-01	6.48E-01	8.79E-01	1.15E+00	1.00E+00	9.06E-01	8.16E-01	7.70E-01	6.98E-01	6.45E-01	7.11E-01	7.72E-01	8.67E-01	1.04E+00	1.15E+00	1.19E+00	1.44E+00	1.69E+00	1.73E+00
6.63E-01	3.40E-01	4.56E-01	5.51E-01	5.54E-01	6.27E-01	6.02E-01	6.12E-01	6.19E-01	6.50E-01	6.88E-01	7.10E-01	7.49E-01	6.63E-01	8.76E-01	1.16E+00	1.01E+00	9.10E-01	8.17E-01	7.76E-01	7.10E-01	6.63E-01	7.20E-01	7.72E-01	8.69E-01	1.05E+00	1.16E+00	1.20E+00	1.46E+00	1.72E+00	1.76E+00
6.58E-01	3.48E-01	4.37E-01	5.31E-01	5.58E-01	6.32E-01	6.05E-01	6.17E-01	6.23E-01	6.46E-01	6.77E-01	7.01E-01	7.43E-01	6.49E-01	8.91E-01	1.16E+00	1.01E+00	9.12E-01	8.23E-01	7.78E-01	7.07E-01	6.54E-01	7.19E-01	7.78E-01	8.74E-01	1.05E+00	1.16E+00	1.20E+00	1.45E+00	1.69E+00	1.74E+00
6.64E-01	3.46E-01	4.42E-01	5.41E-01	5.54E-01	6.31E-01	6.04E-01	6.16E-01	6.23E-01	6.27E-01	6.42E-01	6.69E-01	7.15E-01	6.11E-01	8.83E-01	1.15E+00	9.98E-01	8.98E-01	8.03E-01	7.58E-01	6.87E-01	6.33E-01	7.10E-01	7.82E-01	8.74E-01	1.05E+00	1.16E+00	1.20E+00	1.45E+00	1.69E+00	1.73E+00
6.62E-01	3.44E-01	4.54E-01	5.42E-01	5.51E-01	6.35E-01	6.06E-01	6.19E-01	6.26E-01	6.25E-01	6.35E-01	6.62E-01	7.09E-01	6.03E-01	8.80E-01	1.16E+00	1.00E+00	8.93E-01	7.92E-01	7.54E-01	6.94E-01	6.49E-01	7.08E-01	7.62E-01	8.60E-01	1.04E+00	1.15E+00	1.20E+00	1.45E+00	1.70E+00	1.74E+00
7.21E-01	3.41E-01	4.32E-01	5.44E-01	5.52E-01	6.16E-01	5.93E-01	6.03E-01	6.09E-01	6.20E-01	6.42E-01	6.68E-01	7.13E-01	6.11E-01	8.76E-01	1.16E+00	1.00E+00	9.12E-01	8.23E-01	7.76E-01	7.01E-01	6.47E-01	7.11E-01	7.70E-01	8.66E-01	1.04E+00	1.16E+00	1.20E+00	1.48E+00	1.76E+00	1.81E+00
7.07E-01	3.60E-01	4.37E-01	5.12E-01	5.38E-01	6.20E-01	5.91E-01	6.04E-01	6.11E-01	6.41E-01	6.78E-01	7.01E-01	7.42E-01	6.52E-01	8.75E-01	1.17E+00	1.01E+00	9.10E-01	8.13E-01	7.78E-01	7.22E-01	6.81E-01	7.31E-01	7.76E-01	8.69E-01	1.04E+00	1.14E+00	1.19E+00	1.48E+00	1.76E+00	1.81E+00
7.11E-01	2.93E-01	4.44E-01	5.02E-01	5.38E-01	6.15E-01	5.87E-01	5.99E-01	6.07E-01	6.41E-01	6.83E-01	7.05E-01	7.43E-01	6.60E-01	8.63E-01	1.16E+00	1.00E+00	9.07E-01	8.15E-01	7.79E-01	7.21E-01	6.79E-01	7.29E-01	7.75E-01	8.69E-01	1.04E+00	1.15E+00	1.19E+00	1.43E+00	1.67E+00	1.72E+00
6.84E-01	3.19E-01	4.37E-01	5.16E-01	5.47E-01	6.29E-01	5.99E-01	6.12E-01	6.20E-01	6.42E-01	6.73E-01	6.96E-01	7.37E-01	6.46E-01	8.77E-01	1.16E+00	1.01E+00	9.11E-01	8.20E-01	7.77E-01	7.09E-01	6.60E-01	7.20E-01	7.76E-01	8.73E-01	1.05E+00	1.17E+00	1.20E+00	1.40E+00	1.59E+00	1.63E+00
6.78E-01	3.40E-01	4.32E-01	4.97E-01	5.62E-01	6.24E-01	5.99E-01	6.10E-01	6.17E-01	6.31E-01	6.55E-01	6.80E-01	7.25E-01	6.25E-01	8.81E-01	1.16E+00	1.01E+00	9.10E-01	8.17E-01	7.78E-01	7.15E-01	6.69E-01	7.21E-01	7.68E-01	8.67E-01	1.05E+00	1.16E+00	1.19E+00	1.39E+00	1.59E+00	1.62E+00
6.74E-01	3.37E-01	4.22E-01	4.68E-01	5.37E-01	6.18E-01	5.86E-01	6.00E-01	6.08E-01	6.31E-01	6.62E-01	6.87E-01	7.30E-01	6.33E-01	8.83E-01	1.16E+00	1.00E+00	9.02E-01	8.07E-01	7.71E-01	7.12E-01	6.70E-01	7.22E-01	7.70E-01	8.69E-01	1.05E+00	1.16E+00	1.20E+00	1.42E+00	1.64E+00	1.69E+00
6.84E-01	3.21E-01	4.52E-01	4.82E-01	5.39E-01	6.18E-01	5.88E-01	6.02E-01	6.09E-01	6.27E-01	6.54E-01	6.80E-01	7.24E-01	6.25E-01	8.76E-01	1.18E+00	1.02E+00	9.25E-01	8.34E-01	7.94E-01	7.30E-01	6.86E-01	7.30E-01	7.70E-01	8.69E-01	1.05E+00	1.16E+00	1.20E+00	1.43E+00	1.67E+00	1.71E+00
6.71E-01	3.46E-01	4.42E-01	4.94E-01	5.46E-01	6.01E-01	5.79E-01	5.89E-01	5.95E-01	6.23E-01	6.62E-01	6.87E-01	7.31E-01	6.34E-01	8.79E-01	1.18E+00	1.01E+00	9.13E-01	8.17E-01	7.79E-01	7.19E-01	6.75E-01	7.25E-01	7.70E-01	8.66E-01	1.04E+00	1.15E+00	1.19E+00	1.44E+00	1.69E+00	1.74E+00
5.96E-01	3.36E-01	4.39E-01	5.11E-01	5.57E-01	5.89E-01	5.75E-01	5.82E-01	5.86E-01	6.23E-01	6.72E-01	6.96E-01	7.38E-01	6.44E-01	8.87E-01	1.16E+00	1.00E+00	8.98E-01	8.00E-01	7.71E-01	7.23E-01	6.89E-01	7.25E-01	7.57E-01	8.57E-01	1.03E+00	1.14E+00	1.19E+00	1.46E+00	1.73E+00	1.78E+00
8.33E-01	2.96E-01	4.61E-01	5.04E-01	5.49E-01	6.03E-01	5.82E-01	5.91E-01	5.97E-01	6.24E-01	6.62E-01	6.87E-01	7.30E-01	6.33E-01	8.80E-01	1.17E+00	1.00E+00	8.95E-01	7.93E-01	7.61E-01	7.09E-01	6.70E-01	7.22E-01	7.69E-01	8.68E-01	1.05E+00	1.16E+00	1.20E+00	1.46E+00	1.71E+00	1.76E+00
5.61E-01	3.04E-01	4.79E-01	5.04E-01	5.38E-01	6.21E-01	5.91E-01	6.04E-01	6.12E-01	6.29E-01	6.57E-01	6.84E-01	7.31E-01	6.25E-01	9.06E-01	1.17E+00	1.01E+00	8.89E-01	7.82E-01	7.57E-01	7.16E-01	6.86E-01	7.25E-01	7.59E-01	8.60E-01	1.04E+00	1.15E+00	1.19E+00	1.46E+00	1.71E+00	1.76E+00
6.24E-01	3.01E-01	4.09E-01	5.07E-01	5.53E-01	6.01E-01	5.82E-01	5.91E-01	5.96E-01	6.19E-01	6.54E-01	6.81E-01	7.26E-01	6.23E-01	8.92E-01	1.17E+00	1.00E+00	8.82E-01	7.73E-01	7.49E-01	7.09E-01	6.78E-01	7.23E-01	7.64E-01	8.63E-01	1.04E+00	1.15E+00	1.20E+00	1.46E+00	1.72E+00	1.76E+00
5.68E-01	2.75E-01	4.01E-01	5.27E-01	5.38E-01	6.19E-01	5.91E-01	6.03E-01	6.10E-01	6.25E-01	6.50E-01	6.76E-01	7.22E-01	6.19E-01	8.86E-01	1.17E+00	1.00E+00	8.91E-01	7.85E-01	7.61E-01	7.22E-01	6.92E-01	7.38E-01	7.78E-01	8.77E-01	1.05E+00	1.16E+00	1.21E+00	1.46E+00	1.71E+00	1.76E+00
5.64E-01	2.74E-01	4.14E-01	5.19E-01	5.45E-01	6.20E-01	5.93E-01	6.05E-01	6.12E-01	6.30E-01	6.57E-01	6.82E-01	7.24E-01	6.30E-01	8.68E-01	1.16E+00	9.97E-01	8.91E-01	7.90E-01	7.61E-01	7.13E-01	6.77E-01	7.27E-01	7.71E-01	8.69E-01	1.04E+00	1.16E+00	1.20E+00	1.45E+00	1.70E+00	1.75E+00
5.68E-01	2.85E-01	4.52E-01	5.17E-01	5.44E-01	6.39E-01	6.06E-01	6.20E-01	6.29E-01	6.49E-01	6.76E-01	6.98E-01	7.37E-01	6.52E-01	8.59E-01	1.16E+00	9.99E-01	8.97E-01	7.99E-01	7.68E-01	7.17E-01	6.80E-01	7.22E-01	7.59E-01	8.59E-01	1.04E+00	1.15E+00	1.19E+00	1.42E+00	1.66E+00	1.70E+00
5.98E-01	3.10E-01	4.27E-01	5.13E-01	5.37E-01	6.32E-01	5.98E-01	6.13E-01	6.21E-01	6.34E-01	6.55E-01	6.79E-01	7.21E-01	6.27E-01	8.61E-01	1.18E+00	1.00E+00	8.90E-01	7.83E-01	7.64E-01	7.30E-01	7.07E-01	7.31E-01	7.49E-01	8.55E-01	1.04E+00	1.16E+00	1.20E+00	1.45E+00	1.70E+00	1.75E+00
6.13E-01	3.34E-01	4.56E-01	5.10E-01	5.31E-01	6.26E-01	5.93E-01	6.07E-01	6.16E-01	6.33E-01	6.58E-01	6.83E-01	7.25E-01	6.31E-01	8.65E-01	1.19E+00	1.01E+00	9.14E-01	8.16E-01	7.83E-01	7.28E-01	6.91E-01	7.23E-01	7.50E-01	8.54E-01	1.03E+00	1.15E+00	1.20E+00	1.47E+00	1.73E+00	1.78E+00
6.42E-01	3.21E-01	4.52E-01	5.16E-01	5.36E-01	6.35E-01	6.00E-01	6.15E-01	6.24E-01	6.47E-01	6.76E-01	6.99E-01	7.40E-01	6.51E-01	8.72E-01	1.17E+00	1.01E+00	9.10E-01	8.17E-01	7.81E-01	7.21E-01	6.81E-01	7.15E-01	7.44E-01	8.50E-01	1.04E+00	1.15E+00	1.20E+00	1.46E+00	1.73E+00	1.77E+00
6.44E-01	3.16E-01	4.22E-01	5.27E-01	5.35E-01	6.28E-01	5.96E-01	6.10E-01	6.18E-01	6.28E-01	6.47E-01	6.74E-01	7.20E-01	6.16E-01	8.88E-01	1.17E+00	1.01E+00	9.00E-01	8.00E-01	7.66E-01	7.11E-01	6.72E-01	7.17E-01	7.57E-01	8.59E-01	1.04E+00	1.15E+00	1.20E+00	1.44E+00	1.69E+00	1.73E+00
6.48E-01	3.34E-01	4.44E-01	5.19E-01	5.43E-01	6.08E-01	5.84E-01	5.94E-01	6.01E-01	6.31E-01	6.71E-01	6.95E-01	7.38E-01	6.42E-01	8.87E-01	1.17E+00	1.01E+00	9.02E-01	8.01E-01	7.67E-01	7.11E-01	6.71E-01	7.12E-01	7.48E-01	8.54E-01	1.04E+00	1.16E+00	1.20E+00	1.45E+00	1.70E+00	1.75E+00
6.76E-01	3.31E-01	4.44E-01	5.06E-01	5.24E-01	6.17E-01	5.85E-01	5.99E-01	6.07E-01	6.40E-01	6.79E-01	7.03E-01	7.43E-01	6.53E-01	8.79E-01	1.17E+00	1.01E+00	9.09E-01	8.12E-01	7.80E-01	7.26E-01	6.91E-01	7.21E-01	7.45E-01	8.54E-01	1.04E+00	1.16E+00	1.20E+00	1.45E+00	1.70E+00	1.74E+00
6.47E-01	3.38E-01	4.56E-01	5.23E-01	5.11E-01	6.14E-01	5.80E-01	5.94E-01	6.03E-01	6.32E-01	6.68E-01	6.90E-01	7.30E-01	6.42E-01	8.59E-01	1.17E+00	1.00E+00	9.03E-01	8.07E-01	7.68E-01	7.05E-01	6.60E-01	7.09E-01	7.53E-01	8.54E-01	1.03E+00	1.15E+00	1.19E+00	1.44E+00	1.69E+00	1.74E+00
6.52E-01	3.59E-01	4.49E-01	5.49E-01	5.16E-01	6.20E-01	5.87E-01	6.00E-01	6.09E-01	6.39E-01	6.75E-01	6.97E-01	7.37E-01	6.50E-01	8.65E-01	1.17E+00	1.00E+00	9.04E-01	8.08E-01	7.66E-01	7.00E-01	6.52E-01	7.08E-01	7.59E-01	8.59E-01	1.04E+00	1.16E+00	1.20E+00	1.46E+00	1.72E+00	1.77E+00
6.95E-01	3.62E-01	4.56E-01	5.36E-01	5.24E-01	6.34E-01	5.98E-01	6.13E-01	6.22E-01	6.31E-01	6.49E-01	6.74E-01	7.20E-01	6.19E-01	8.79E-01	1.17E+00	1.00E+00	9.00E-01	8.02E-01	7.65E-01	7.05E-01	6.62E-01	7.13E-01	7.59E-01	8.58E-01	1.04E+00	1.15E+00	1.19E+00	1.41E+00	1.64E+00	1.68E+00
6.65E-01	3.24E-01	4.59E-01	5.51E-01	5.31E-01	6.24E-01	5.94E-01	6.06E-01	6.14E-01	6.21E-01	6.38E-01	6.65E-01	7.12E-01	6.06E-01	8.78E-01	1.18E+00	1.01E+00	8.96E-01	7.91E-01	7.58E-01	7.04E-01	6.64E-01	7.17E-01	7.66E-01	8.64E-01	1.04E+00	1.15E+00	1.20E+00	1.44E+00	1.68E+00	1.73E+00
6.61E-01	3.14E-01	4.66E-01	5.61E-01	5.24E-01	6.16E-01	5.87E-01	5.99E-01	6.06E-01	6.24E-01	6.51E-01	6.76E-01	7.21E-01	6.21E-01	8.78E-01	1.15E+00	9.91E-01	8.80E-01	7.77E-01	7.53E-01	7.11E-01	6.82E-01	7.13E-01	7.39E-01	8.48E-01	1.03E+00	1.16E+00	1.19E+00	1.44E+00	1.67E+00	1.72E+00
6.56E-01	3.11E-01	4.49E-01	5.52E-01	5.31E-01	6.07E-01	5.82E-01	5.92E-01	5.99E-01	6.04E-01	6.21E-01	6.51E-01	7.02E-01	5.86E-01	8.90E-01	1.18E+00	1.01E+00	8.85E-01	7.72E-01	7.53E-01	7.17E-01	6.92E-01	7.27E-01	7.58E-01	8.60E-01	1.04E+00	1.16E+00	1.20E+00	1.44E+00	1.68E+00	1.73E+00
6.69E-01	3.09E-01	4.56E-01	5.64E-01	5.47E-01	6.14E-01	5.92E-01	6.01E-01	6.07E-01	6.19E-01	6.43E-01	6.70E-01	7.18E-01	6.11E-01	8.87E-01	1.19E+00	1.01E+00	8.98E-01	7.90E-01	7.62E-01	7.14E-01	6.81E-01	7.20E-01	7.54E-01	8.57E-01	1.04E+00	1.15E+00	1.19E+00	1.44E+00	1.68E+00	1.72E+00
6.79E-01	3.16E-01	4.51E-01	5.65E-01	5.24E-01	6.22E-01	5.91E-01	6.04E-01	6.12E-01	6.27E-01	6.52E-01	6.78E-01	7.25E-01	6.21E-01	8.89E-01	1.18E+00	1.01E+00	8.91E-01	7.82E-01	7.59E-01	7.19E-01	6.91E-01	7.18E-01	7.41E-01	8.49E-01	1.04E+00	1.15E+00	1.20E+00	1.44E+00	1.68E+00	1.72E+00
6.68E-01	3.30E-01	4.70E-01	5.31E-01	5.31E-01	6.15E-01	5.87E-01	5.99E-01	6.06E-01	6.25E-01	6.53E-01	6.79E-01	7.24E-01	6.23E-01	8.84E-01	1.17E+00	1.00E+00	8.91E-01	7.86E-01	7.60E-01	7.17E-01	6.87E-01	7.20E-01	7.47E-01	8.52E-01	1.03E+00	1.15E+00	1.19E+00	1.44E+00	1.69E+00	1.73E+00
6.71E-01	3.21E-01	4.24E-01	5.19E-01	5.25E-01	6.42E-01	6.02E-01	6.19E-01	6.29E-01	6.29E-01	6.38E-01	6.65E-01	7.12E-01	6.06E-01	8.78E-01	1.18E+00	1.01E+00	9.00E-01	7.95E-01	7.75E-01	7.39E-01	7.16E-01	7.37E-01	7.54E-01	8.58E-01	1.03E+00	1.15E+00	1.19E+00	1.44E+00	1.68E+00	1.73E+00
6.80E-01	3.05E-01	4.54E-01	5.38E-01	5.15E-01	6.33E-01	5.95E-01	6.11E-01	6.20E-01	6.22E-01	6.32E-01	6.61E-01	7.10E-01	5.99E-01	8.89E-01	1.18E+00	1.01E+00	8.91E-01	7.82E-01	7.65E-01	7.32E-01	7.12E-01	7.28E-01	7.41E-01	8.47E-01	1.03E+00	1.15E+00	1.19E+00	1.44E+00	1.68E+00	1.73E+00
6.99E-01	3.01E-01	4.51E-01	5.49E-01	5.31E-01	6.12E-01	5.86E-01	5.97E-01	6.04E-01	6.13E-01	6.35E-01	6.63E-01	7.13E-01	6.01E-01	8.95E-01	1.18E+00	1.01E+00	8.87E-01	7.76E-01	7.60E-01	7.30E-01	7.11E-01	7.25E-01	7.35E-01	8.45E-01	1.03E+00	1.15E+00	1.19E+00	1.43E+00	1.68E+00	1.72E+00
7.13E-01	3.12E-01	4.34E-01	5.43E-01	5.48E-01	6.23E-01	5.97E-01	6.08E-01	6.14E-01	6.20E-01	6.38E-01	6.67E-01	7.18E-01	6.04E-01	9.04E-01	1.19E+00	1.01E+00	8.92E-01	7.78E-01	7.59E-01	7.25E-01	7.02E-01	7.26E-01	7.45E-01	8.51E-01	1.03E+00	1.15E+00	1.19E+00	1.42E+00	1.65E+00	1.69E+00
7.09E-01	2.85E-01	4.27E-01	5.51E-01	5.36E-01	6.26E-01	5.96E-01	6.08E-01	6.16E-01	6.21E-01	6.37E-01	6.65E-01	7.14E-01	6.04E-01	8.91E-01	1.19E+00	1.01E+00	8.98E-01	7.89E-01	7.72E-01	7.41E-01	7.22E-01	7.38E-01	7.49E-01	8.56E-01	1.04E+00	1.16E+00	1.20E+00	1.44E+00	1.69E+00	1.73E+00
7.11E-01	3.10E-01	4.24E-01	5.28E-01	5.32E-01	6.32E-01	5.98E-01	6.12E-01	6.21E-01	6.22E-01	6.33E-01	6.60E-01	7.09E-01	6.01E-01	8.74E-01	1.21E+00	1.02E+00	9.03E-01	7.89E-01	7.74E-01	7.43E-01	7.25E-01	7.34E-01	7.39E-01	8.51E-01	1.04E+00	1.16E+00	1.21E+00	1.49E+00	1.76E+00	1.81E+00
7.21E-01	3.02E-01	4.44E-01	5.24E-01	5.51E-01	6.23E-01	5.97E-01	6.08E-01	6.15E-01	6.11E-01	6.18E-01	6.46E-01	6.96E-01	5.85E-01	8.65E-01	1.21E+00	1.02E+00	8.98E-01	7.82E-01	7.68E-01	7.40E-01	7.23E-01	7.40E-01	7.53E-01	8.58E-01	1.04E+00	1.15E+00	1.20E+00	1.46E+00	1.71E+00	1.76E+00
7.13E-01	3.13E-01	4.47E-01	5.03E-01	5.52E-01	6.17E-01	5.92E-01	6.03E-01	6.09E-01	6.05E-01	6.12E-01	6.41E-01	6.92E-01	5.78E-01	8.63E-01	1.22E+00	1.02E+00	8.97E-01	7.77E-01	7.59E-01	7.26E-01	7.03E-01	7.29E-01	7.50E-01	8.55E-01	1.04E+00	1.15E+00	1.20E+00	1.46E+00	1.72E+00	1.77E+00
7.12E-01	3.46E-01	4.39E-01	4.85E-01	5.21E-01	6.15E-01	5.82E-01	5.96E-01	6.05E-01	6.15E-01	6.34E-01	6.62E-01	7.10E-01	6.03E-01	8.77E-01	1.19E+00	1.01E+00	9.02E-01	7.94E-01	7.75E-01	7.38E-01	7.17E-01	7.27E-01	7.32E-01	8.43E-01	1.03E+00	1.15E+00	1.19E+00	1.44E+00	1.68E+00	1.73E+00
7.00E-01	3.45E-01	4.11E-01	5.00E-01	5.30E-01	6.16E-01	5.85E-01	5.99E-01	6.06E-01	6.13E-01	6.31E-01	6.60E-01	7.09E-01	5.98E-01	8.86E-01	1.20E+00	1.02E+00	9.07E-01	7.97E-01	7.82E-01	7.50E-01	7.33E-01	7.34E-01	7.31E-01	8.47E-01	1.04E+00	1.16E+00	1.20E+00	1.42E+00	1.63E+00	1.67E+00
6.16E-01	3.54E-01	4.42E-01	5.19E-01	5.40E-01	6.01E-01	5.79E-01	5.88E-01	5.94E-01	5.98E-01	6.16E-01	6.46E-01	6.98E-01	5.80E-01	8.85E-01	1.21E+00	1.02E+00	9.02E-01	7.87E-01	7.71E-01	7.39E-01	7.19E-01	7.33E-01	7.42E-01	8.52E-01	1.04E+00	1.16E+00	1.19E+00	1.41E+00	1.62E+00	1.65E+00
5.80E-01	3.48E-01	4.37E-01	5.19E-01	5.40E-01	5.97E-01	5.77E-01	5.86E-01	5.91E-01	6.07E-01	6.34E-01	6.61E-01	7.09E-01	6.03E-01	8.71E-01	1.20E+00	1.02E+00	9.12E-01	8.04E-01	7.81E-01	7.39E-01	7.12E-01	7.36E-01	7.55E-01	8.58E-01	1.03E+00	1.15E+00	1.18E+00	1.40E+00	1.61E+00	1.65E+00
5.63E-01	3.21E-01	3.98E-01	5.16E-01	5.48E-01	6.08E-01	5.85E-01	5.95E-01	6.01E-01	6.05E-01	6.22E-01	6.51E-01	7.02E-01	5.87E-01	8.84E-01	1.20E+00	1.02E+00	9.07E-01	7.97E-01	7.71E-01	7.26E-01	6.95E-01	7.30E-01	7.59E-01	8.62E-01	1.04E+00	1.15E+00	1.19E+00	1.40E+00	1.61E+00	1.65E+00
5.50E-01	3.14E-01	4.37E-01	5.23E-01	5.30E-01	6.38E-01	6.01E-01	6.16E-01	6.26E-01	6.26E-01	6.35E-01	6.62E-01	7.09E-01	6.04E-01	8.68E-01	1.20E+00	1.02E+00	8.98E-01	7.86E-01	7.63E-01	7.23E-01	6.95E-01	7.28E-01	7.56E-01	8.63E-01	1.05E+00	1.17E+00	1.20E+00	1.41E+00	1.62E+00	1.66E+00
5.61E-01	3.26E-01	4.27E-01	5.15E-01	5.41E-01	6.52E-01	6.13E-01	6.30E-01	6.40E-01	6.36E-01	6.40E-01	6.67E-01	7.14E-01	6.09E-01	8.74E-01	1.20E+00	1.02E+00	9.10E-01	8.04E-01	7.87E-01	7.54E-01	7.36E-01	7.39E-01	7.36E-01	8.50E-01	1.04E+00	1.16E+00	1.19E+00	1.35E+00	1.51E+00	1.54E+00
5.72E-01	3.26E-01	4.34E-01	4.89E-01	5.35E-01	6.13E-01	5.84E-01	5.97E-01	6.04E-01	6.22E-01	6.51E-01	6.77E-01	7.23E-01	6.21E-01	8.78E-01	1.20E+00	1.02E+00	9.13E-01	8.06E-01	7.81E-01	7.38E-01	7.11E-01	7.22E-01	7.27E-01	8.42E-01	1.03E+00	1.16E+00	1.18E+00	1.35E+00	1.52E+00	1.55E+00
5.53E-01	3.36E-01	4.11E-01	5.01E-01	5.42E-01	6.29E-01	5.97E-01	6.11E-01	6.19E-01	6.34E-01	6.57E-01	6.81E-01	7.25E-01	6.29E-01	8.64E-01	1.20E+00	1.02E+00	9.06E-01	7.96E-01	7.74E-01	7.33E-01	7.09E-01	7.19E-01	7.24E-01	8.43E-01	1.04E+00	1.17E+00	1.18E+00	1.27E+00	1.35E+00	1.36E+00
5.34E-01	3.42E-01	4.32E-01	5.40E-01	5.30E-01	6.17E-01	5.88E-01	6.00E-01	6.08E-01	6.23E-01	6.47E-01	6.73E-01	7.18E-01	6.18E-01	8.67E-01	1.21E+00	1.02E+00	8.97E-01	7.81E-01	7.68E-01	7.40E-01	7.24E-01	7.31E-01	7.34E-01	8.50E-01	1.04E+00	1.17E+00	1.18E+00	1.26E+00	1.34E+00	1.35E+00
5.79E-01	3.26E-01	4.27E-01	5.41E-01	5.29E-01	6.19E-01	5.89E-01	6.02E-01	6.09E-01	6.18E-01	6.35E-01	6.61E-01	7.07E-01	6.06E-01	8.55E-01	1.21E+00	1.02E+00	8.97E-01	7.80E-01	7.69E-01	7.44E-01	7.28E-01	7.48E-01	7.64E-01	8.71E-01	1.05E+00	1.17E+00	1.18E+00	1.26E+00	1.33E+00	1.34E+00
5.52E-01	3.22E-01	4.11E-01	5.70E-01	5.18E-01	6.18E-01	5.87E-01	6.00E-01	6.07E-01	6.12E-01	6.27E-01	6.53E-01	7.00E-01	5.96E-01	8.54E-01	1.20E+00	1.01E+00	8.99E-01	7.87E-01	7.74E-01	7.48E-01	7.31E-01	7.47E-01	7.59E-01	8.63E-01	1.04E+00	1.15E+00	1.17E+00	1.25E+00	1.33E+00	1.35E+00
5.84E-01	3.20E-01	3.90E-01	5.50E-01	5.32E-01	6.12E-01	5.86E-01	5.97E-01	6.03E-01	6.15E-01	6.36E-01	6.62E-01	7.08E-01	6.07E-01	8.58E-01	1.20E+00	1.01E+00	8.89E-01	7.74E-01	7.61E-01	7.35E-01	7.17E-01	7.41E-01	7.60E-01	8.64E-01	1.04E+00	1.16E+00	1.17E+00	1.28E+00	1.37E+00	1.39E+00
5.42E-01	3.22E-01	4.22E-01	5.43E-01	5.41E-01	6.12E-01	5.88E-01	5.98E-01	6.04E-01	6.19E-01	6.44E-01	6.69E-01	7.15E-01	6.14E-01	8.69E-01	1.18E+00	1.00E+00	8.86E-01	7.76E-01	7.62E-01	7.34E-01	7.15E-01	7.40E-01	7.61E-01	8.63E-01	1.04E+00	1.15E+00	1.17E+00	1.28E+00	1.40E+00	1.42E+00
6.11E-01	3.09E-01	4.27E-01	5.57E-01	5.48E-01	6.14E-01	5.92E-01	6.01E-01	6.07E-01	6.14E-01	6.32E-01	6.57E-01	7.03E-01	6.02E-01	8.54E-01	1.19E+00	1.01E+00	8.89E-01	7.77E-01	7.59E-01	7.28E-01	7.05E-01	7.38E-01	7.67E-01	8.66E-01	1.04E+00	1.15E+00	1.17E+00	1.27E+00	1.36E+00	1.38E+00
8.83E-01	4.36E-01	4.06E-01	5.59E-01	5.36E-01	6.31E-01	6.00E-01	6.13E-01	6.21E-01	6.31E-01	6.49E-01	6.73E-01	7.16E-01	6.22E-01	8.56E-01	1.17E+00	1.00E+00	8.92E-01	7.87E-01	7.76E-01	7.53E-01	7.37E-01	7.54E-01	7.66E-01	8.68E-01	1.04E+00	1.15E+00	1.17E+00	1.30E+00	1.43E+00	1.45E+00
5.65E-01	4.24E-01	4.19E-01	5.56E-01	5.55E-01	6.22E-01	5.99E-01	6.09E-01	6.15E-01	6.28E-01	6.52E-01	6.77E-01	7.20E-01	6.23E-01	8.71E-01	1.16E+00	9.95E-01	8.86E-01	7.82E-01	7.72E-01	7.50E-01	7.36E-01	7.51E-01	7.61E-01	8.65E-01	1.04E+00	1.15E+00	1.17E+00	1.29E+00	1.40E+00	1.42E+00
4.65E-01	4.57E-01	4.09E-01	5.52E-01	5.51E-01	6.24E-01	5.99E-01	6.10E-01	6.16E-01	6.37E-01	6.66E-01	6.89E-01	7.30E-01	6.41E-01	8.57E-01	1.18E+00	1.00E+00	8.93E-01	7.87E-01	7.74E-01	7.48E-01	7.31E-01	7.51E-01	7.67E-01	8.66E-01	1.03E+00	1.14E+00	1.16E+00	1.29E+00	1.41E+00	1.43E+00
6.06E-01	4.06E-01	4.66E-01	5.41E-01	5.40E-01	6.31E-01	6.01E-01	6.14E-01	6.21E-01	6.34E-01	6.54E-01	6.75E-01	7.15E-01	6.30E-01	8.30E-01	1.18E+00	9.98E-01	8.91E-01	7.87E-01	7.70E-01	7.39E-01	7.19E-01	7.38E-01	7.51E-01	8.57E-01	1.04E+00	1.15E+00	1.17E+00	1.29E+00	1.40E+00	1.43E+00
7.82E-01	3.43E-01	4.56E-01	5.42E-01	5.44E-01	6.18E-01	5.93E-01	6.03E-01	6.10E-01	6.24E-01	6.47E-01	6.72E-01	7.15E-01	6.20E-01	8.55E-01	1.19E+00	1.01E+00	9.05E-01	8.01E-01	7.75E-01	7.29E-01	6.98E-01	7.28E-01	7.54E-01	8.59E-01	1.04E+00	1.16E+00	1.18E+00	1.29E+00	1.39E+00	1.41E+00
4.90E-01	3.89E-01	4.22E-01	5.53E-01	5.45E-01	6.35E-01	6.05E-01	6.18E-01	6.26E-01	6.33E-01	6.48E-01	6.72E-01	7.15E-01	6.21E-01	8.48E-01	1.20E+00	1.01E+00	9.03E-01	7.96E-01	7.79E-01	7.48E-01	7.27E-01	7.47E-01	7.63E-01	8.69E-01	1.05E+00	1.17E+00	1.18E+00	1.29E+00	1.39E+00	1.41E+00
4.59E-01	4.54E-01	4.37E-01	5.58E-01	5.54E-01	6.32E-01	6.06E-01	6.17E-01	6.23E-01	6.28E-01	6.41E-01	6.64E-01	7.06E-01	6.15E-01	8.37E-01	1.18E+00	9.99E-01	8.92E-01	7.87E-01	7.68E-01	7.34E-01	7.11E-01	7.40E-01	7.65E-01	8.66E-01	1.04E+00	1.16E+00	1.17E+00	1.29E+00	1.40E+00	1.42E+00
3.69E-01	4.58E-01	4.24E-01	5.54E-01	5.51E-01	6.04E-01	5.86E-01	5.94E-01	5.99E-01	6.37E-01	6.82E-01	7.01E-01	7.36E-01	6.62E-01	8.29E-01	1.18E+00	9.99E-01	8.96E-01	7.94E-01	7.75E-01	7.41E-01	7.19E-01	7.40E-01	7.57E-01	8.63E-01	1.04E+00	1.16E+00	1.18E+00	1.29E+00	1.39E+00	1.41E+00
4.85E-01	5.04E-01	4.22E-01	5.62E-01	5.44E-01	6.27E-01	6.00E-01	6.11E-01	6.18E-01	6.37E-01	6.64E-01	6.86E-01	7.26E-01	6.40E-01	8.47E-01	1.18E+00	1.01E+00	9.02E-01	7.99E-01	7.75E-01	7.34E-01	7.05E-01	7.38E-01	7.66E-01	8.67E-01	1.04E+00	1.16E+00	1.18E+00	1.29E+00	1.41E+00	1.43E+00
3.94E-01	4.56E-01	4.19E-01	5.47E-01	5.41E-01	6.22E-01	5.95E-01	6.06E-01	6.13E-01	6.34E-01	6.62E-01	6.84E-01	7.23E-01	6.39E-01	8.36E-01	1.18E+00	1.00E+00	8.94E-01	7.90E-01	7.68E-01	7.30E-01	7.03E-01	7.40E-01	7.72E-01	8.73E-01	1.05E+00	1.16E+00	1.18E+00	1.30E+00	1.42E+00	1.44E+00
4.30E-01	3.09E-01	4.34E-01	5.46E-01	5.65E-01	6.16E-01	5.97E-01	6.05E-01	6.10E-01	6.27E-01	6.54E-01	6.76E-01	7.17E-01	6.29E-01	8.37E-01	1.19E+00	1.01E+00	9.00E-01	7.94E-01	7.78E-01	7.48E-01	7.29E-01	7.50E-01	7.68E-01	8.69E-01	1.04E+00	1.16E+00	1.19E+00	1.37E+00	1.56E+00	1.59E+00
4.92E-01	2.89E-01	4.16E-01	5.44E-01	5.64E-01	6.16E-01	5.96E-01	6.05E-01	6.10E-01	6.37E-01	6.72E-01	6.93E-01	7.32E-01	6.49E-01	8.41E-01	1.20E+00	1.01E+00	9.11E-01	8.08E-01	7.87E-01	7.49E-01	7.25E-01	7.44E-01	7.59E-01	8.62E-01	1.04E+00	1.15E+00	1.18E+00	1.38E+00	1.57E+00	1.60E+00
4.47E-01	3.20E-01	3.98E-01	5.31E-01	5.74E-01	6.19E-01	6.01E-01	6.09E-01	6.14E-01	6.41E-01	6.77E-01	6.98E-01	7.36E-01	6.54E-01	8.43E-01	1.20E+00	1.01E+00	9.00E-01	7.89E-01	7.70E-01	7.34E-01	7.10E-01	7.35E-01	7.55E-01	8.60E-01	1.04E+00	1.16E+00	1.18E+00	1.33E+00	1.49E+00	1.51E+00
4.59E-01	3.57E-01	4.34E-01	5.48E-01	5.53E-01	6.26E-01	6.01E-01	6.11E-01	6.18E-01	6.33E-01	6.55E-01	6.78E-01	7.18E-01	6.31E-01	8.36E-01	1.20E+00	1.01E+00	9.02E-01	7.95E-01	7.78E-01	7.45E-01	7.25E-01	7.39E-01	7.49E-01	8.57E-01	1.04E+00	1.16E+00	1.18E+00	1.32E+00	1.45E+00	1.48E+00
5.70E-01	3.21E-01	4.19E-01	5.48E-01	5.48E-01	6.29E-01	6.01E-01	6.13E-01	6.20E-01	6.48E-01	6.81E-01	6.99E-01	7.33E-01	6.63E-01	8.13E-01	1.19E+00	1.00E+00	8.93E-01	7.86E-01	7.58E-01	7.12E-01	6.79E-01	7.15E-01	7.46E-01	8.50E-01	1.03E+00	1.15E+00	1.17E+00	1.31E+00	1.45E+00	1.48E+00
5.61E-01	3.28E-01	4.14E-01	5.46E-01	5.39E-01	6.22E-01	5.94E-01	6.06E-01	6.13E-01	6.36E-01	6.65E-01	6.85E-01	7.22E-01	6.43E-01	8.22E-01	1.18E+00	9.98E-01	8.91E-01	7.86E-01	7.62E-01	7.22E-01	6.93E-01	7.29E-01	7.61E-01	8.61E-01	1.04E+00	1.15E+00	1.17E+00	1.32E+00	1.46E+00	1.49E+00
6.04E-01	3.37E-01	4.24E-01	5.15E-01	5.58E-01	6.34E-01	6.06E-01	6.19E-01	6.26E-01	6.49E-01	6.77E-01	6.97E-01	7.34E-01	6.56E-01	8.33E-01	1.19E+00	1.00E+00	8.84E-01	7.71E-01	7.50E-01	7.13E-01	6.85E-01	7.24E-01	7.59E-01	8.59E-01	1.03E+00	1.15E+00	1.17E+00	1.33E+00	1.48E+00	1.51E+00
4.64E-01	3.20E-01	4.29E-01	5.21E-01	5.63E-01	6.07E-01	5.89E-01	5.98E-01	6.02E-01	6.33E-01	6.72E-01	6.93E-01	7.30E-01	6.51E-01	8.32E-01	1.19E+00	1.00E+00	8.90E-01	7.82E-01	7.58E-01	7.17E-01	6.87E-01	7.23E-01	7.55E-01	8.58E-01	1.04E+00	1.16E+00	1.19E+00	1.38E+00	1.57E+00	1.60E+00
3.90E-01	3.32E-01	4.17E-01	5.10E-01	5.50E-01	6.09E-01	5.86E-01	5.97E-01	6.03E-01	6.19E-01	6.44E-01	6.66E-01	7.06E-01	6.20E-01	8.17E-01	1.20E+00	1.01E+00	8.99E-01	7.90E-01	7.66E-01	7.24E-01	6.96E-01	7.21E-01	7.41E-01	8.48E-01	1.03E+00	1.15E+00	1.18E+00	1.37E+00	1.56E+00	1.59E+00
4.04E-01	3.31E-01	4.03E-01	5.24E-01	5.55E-01	6.02E-01	5.84E-01	5.92E-01	5.97E-01	6.09E-01	6.31E-01	6.54E-01	6.97E-01	6.04E-01	8.27E-01	1.19E+00	9.99E-01	8.91E-01	7.84E-01	7.67E-01	7.35E-01	7.14E-01	7.34E-01	7.49E-01	8.55E-01	1.04E+00	1.15E+00	1.19E+00	1.39E+00	1.59E+00	1.62E+00
6.76E-01	3.14E-01	4.14E-01	5.51E-01	5.49E-01	6.24E-01	5.98E-01	6.09E-01	6.16E-01	6.18E-01	6.30E-01	6.53E-01	6.95E-01	6.04E-01	8.16E-01	1.19E+00	1.00E+00	9.00E-01	7.97E-01	7.70E-01	7.24E-01	6.91E-01	7.28E-01	7.61E-01	8.62E-01	1.04E+00	1.15E+00	1.20E+00	1.46E+00	1.72E+00	1.76E+00
8.08E-01	2.95E-01	4.32E-01	5.53E-01	5.61E-01	6.18E-01	5.98E-01	6.07E-01	6.12E-01	6.28E-01	6.52E-01	6.74E-01	7.15E-01	6.27E-01	8.36E-01	1.20E+00	1.01E+00	8.96E-01	7.86E-01	7.69E-01	7.38E-01	7.17E-01	7.36E-01	7.51E-01	8.56E-01	1.03E+00	1.15E+00	1.20E+00	1.47E+00	1.74E+00	1.79E+00
8.03E-01	2.82E-01	4.19E-01	5.35E-01	5.51E-01	6.29E-01	6.02E-01	6.14E-01	6.21E-01	6.38E-01	6.63E-01	6.83E-01	7.22E-01	6.40E-01	8.25E-01	1.20E+00	1.01E+00	8.91E-01	7.80E-01	7.62E-01	7.29E-01	7.06E-01	7.32E-01	7.52E-01	8.55E-01	1.03E+00	1.15E+00	1.19E+00	1.46E+00	1.72E+00	1.77E+00
8.03E-01	2.97E-01	4.32E-01	5.54E-01	5.37E-01	6.17E-01	5.91E-01	6.02E-01	6.09E-01	6.22E-01	6.44E-01	6.65E-01	7.06E-01	6.20E-01	8.15E-01	1.20E+00	1.01E+00	8.97E-01	7.88E-01	7.61E-01	7.15E-01	6.82E-01	7.27E-01	7.69E-01	8.65E-01	1.04E+00	1.15E+00	1.19E+00	1.45E+00	1.71E+00	1.75E+00
7.99E-01	3.36E-01	4.29E-01	5.39E-01	5.41E-01	6.05E-01	5.83E-01	5.92E-01	5.98E-01	6.18E-01	6.46E-01	6.67E-01	7.07E-01	6.23E-01	8.12E-01	1.19E+00	9.99E-01	8.89E-01	7.80E-01	7.62E-01	7.31E-01	7.07E-01	7.43E-01	7.75E-01	8.71E-01	1.04E+00	1.15E+00	1.19E+00	1.45E+00	1.71E+00	1.76E+00
8.20E-01	3.29E-01	4.27E-01	5.63E-01	5.58E-01	6.02E-01	5.87E-01	5.94E-01	5.98E-01	6.21E-01	6.54E-01	6.76E-01	7.16E-01	6.30E-01	8.29E-01	1.20E+00	1.01E+00	8.94E-01	7.83E-01	7.61E-01	7.24E-01	6.96E-01	7.36E-01	7.70E-01	8.68E-01	1.04E+00	1.15E+00	1.20E+00	1.46E+00	1.73E+00	1.78E+00
8.11E-01	3.25E-01	4.03E-01	5.60E-01	5.60E-01	6.40E-01	6.12E-01	6.24E-01	6.31E-01	6.36E-01	6.50E-01	6.74E-01	7.17E-01	6.24E-01	8.45E-01	1.21E+00	1.02E+00	9.06E-01	7.95E-01	7.69E-01	7.24E-01	6.93E-01	7.29E-01	7.62E-01	8.60E-01	1.03E+00	1.14E+00	1.19E+00	1.46E+00	1.72E+00	1.77E+00
8.57E-01	3.29E-01	4.11E-01	5.37E-01	5.49E-01	6.10E-01	5.88E-01	5.98E-01	6.03E-01	6.08E-01	6.25E-01	6.51E-01	6.97E-01	5.95E-01	8.46E-01	1.21E+00	1.02E+00	9.09E-01	8.00E-01	7.72E-01	7.26E-01	6.92E-01	7.37E-01	7.78E-01	8.72E-01	1.04E+00	1.15E+00	1.20E+00	1.47E+00	1.74E+00	1.79E+00
8.73E-01	3.45E-01	4.06E-01	5.09E-01	5.55E-01	6.27E-01	6.00E-01	6.12E-01	6.19E-01	6.21E-01	6.34E-01	6.60E-01	7.07E-01	6.03E-01	8.64E-01	1.20E+00	1.01E+00	8.94E-01	7.80E-01	7.59E-01	7.24E-01	6.97E-01	7.39E-01	7.76E-01	8.67E-01	1.03E+00	1.13E+00	1.18E+00	1.46E+00	1.73E+00	1.78E+00
8.79E-01	3.18E-01	4.37E-01	5.10E-01	5.64E-01	6.29E-01	6.04E-01	6.15E-01	6.21E-01	6.15E-01	6.19E-01	6.46E-01	6.93E-01	5.88E-01	8.50E-01	1.20E+00	1.01E+00	8.87E-01	7.73E-01	7.64E-01	7.44E-01	7.30E-01	7.56E-01	7.79E-01	8.68E-01	1.02E+00	1.12E+00	1.17E+00	1.45E+00	1.73E+00	1.78E+00
8.79E-01	3.34E-01	4.01E-01	5.32E-01	5.62E-01	6.37E-01	6.09E-01	6.22E-01	6.28E-01	6.24E-01	6.29E-01	6.53E-01	6.98E-01	6.01E-01	8.35E-01	1.19E+00	1.00E+00	8.91E-01	7.81E-01	7.61E-01	7.26E-01	6.99E-01	7.37E-01	7.71E-01	8.61E-01	1.02E+00	1.12E+00	1.17E+00	1.43E+00	1.68E+00	1.73E+00
9.16E-01	3.08E-01	4.27E-01	5.33E-01	5.75E-01	6.18E-01	6.00E-01	6.09E-01	6.13E-01	6.21E-01	6.39E-01	6.63E-01	7.07E-01	6.11E-01	8.45E-01	1.18E+00	9.99E-01	8.81E-01	7.68E-01	7.53E-01	7.26E-01	7.04E-01	7.42E-01	7.76E-01	8.68E-01	1.03E+00	1.13E+00	1.18E+00	1.44E+00	1.70E+00	1.75E+00
9.19E-01	3.20E-01	4.24E-01	5.46E-01	5.79E-01	6.22E-01	6.05E-01	6.12E-01	6.17E-01	6.16E-01	6.27E-01	6.53E-01	6.98E-01	5.98E-01	8.47E-01	1.19E+00	9.98E-01	8.78E-01	7.62E-01	7.48E-01	7.20E-01	6.99E-01	7.41E-01	7.80E-01	8.71E-01	1.03E+00	1.14E+00	1.18E+00	1.45E+00	1.72E+00	1.77E+00
9.33E-01	3.36E-01	4.27E-01	5.84E-01	5.76E-01	6.18E-01	6.04E-01	6.10E-01	6.14E-01	6.20E-01	6.36E-01	6.61E-01	7.04E-01	6.09E-01	8.38E-01	1.20E+00	1.01E+00	8.89E-01	7.74E-01	7.62E-01	7.36E-01	7.19E-01	7.41E-01	7.60E-01	8.58E-01	1.03E+00	1.14E+00	1.18E+00	1.45E+00	1.72E+00	1.77E+00
9.28E-01	3.47E-01	4.37E-01	5.46E-01	5.72E-01	6.22E-01	6.03E-01	6.11E-01	6.16E-01	6.33E-01	6.58E-01	6.79E-01	7.18E-01	6.35E-01	8.25E-01	1.20E+00	1.01E+00	8.91E-01	7.79E-01	7.66E-01	7.42E-01	7.24E-01	7.52E-01	7.77E-01	8.72E-01	1.04E+00	1.14E+00	1.19E+00	1.46E+00	1.73E+00	1.78E+00
9.38E-01	3.32E-01	4.19E-01	5.22E-01	5.60E-01	6.16E-01	5.94E-01	6.04E-01	6.10E-01	6.30E-01	6.59E-01	6.81E-01	7.21E-01	6.34E-01	8.40E-01	1.18E+00	1.00E+00	8.85E-01	7.73E-01	7.64E-01	7.44E-01	7.31E-01	7.50E-01	7.65E-01	8.66E-01	1.04E+00	1.15E+00	1.20E+00	1.47E+00	1.74E+00	1.80E+00
9.50E-01	3.37E-01	4.32E-01	5.16E-01	5.63E-01	6.23E-01	6.00E-01	6.10E-01	6.16E-01	6.38E-01	6.67E-01	6.88E-01	7.26E-01	6.45E-01	8.33E-01	1.19E+00	1.00E+00	8.91E-01	7.82E-01	7.60E-01	7.21E-01	6.95E-01	7.24E-01	7.48E-01	8.53E-01	1.04E+00	1.15E+00	1.20E+00	1.47E+00	1.73E+00	1.78E+00
9.56E-01	3.57E-01	4.39E-01	5.21E-01	5.46E-01	6.25E-01	5.97E-01	6.09E-01	6.16E-01	6.25E-01	6.41E-01	6.64E-01	7.06E-01	6.15E-01	8.34E-01	1.19E+00	1.00E+00	8.90E-01	7.81E-01	7.57E-01	7.16E-01	6.86E-01	7.28E-01	7.66E-01	8.64E-01	1.04E+00	1.15E+00	1.19E+00	1.46E+00	1.73E+00	1.78E+00
9.09E-01	3.42E-01	4.75E-01	5.09E-01	5.52E-01	6.10E-01	5.88E-01	5.98E-01	6.03E-01	6.07E-01	6.20E-01	6.45E-01	6.90E-01	5.92E-01	8.30E-01	1.19E+00	9.97E-01	8.79E-01	7.63E-01	7.52E-01	7.29E-01	7.11E-01	7.41E-01	7.67E-01	8.69E-01	1.04E+00	1.16E+00	1.20E+00	1.47E+00	1.73E+00	1.78E+00
8.68E-01	3.21E-01	4.79E-01	5.04E-01	5.51E-01	5.89E-01	5.73E-01	5.81E-01	5.85E-01	6.04E-01	6.33E-01	6.56E-01	6.99E-01	6.07E-01	8.27E-01	1.18E+00	9.97E-01	8.90E-01	7.84E-01	7.63E-01	7.27E-01	6.99E-01	7.42E-01	7.79E-01	8.74E-01	1.04E+00	1.15E+00	1.19E+00	1.44E+00	1.68E+00	1.73E+00
8.81E-01	3.38E-01	4.47E-01	5.23E-01	5.57E-01	6.09E-01	5.89E-01	5.98E-01	6.03E-01	6.17E-01	6.40E-01	6.63E-01	7.04E-01	6.16E-01	8.22E-01	1.19E+00	9.98E-01	8.89E-01	7.81E-01	7.53E-01	7.07E-01	6.72E-01	7.24E-01	7.70E-01	8.65E-01	1.04E+00	1.15E+00	1.19E+00	1.45E+00	1.70E+00	1.75E+00
8.89E-01	3.24E-01	4.47E-01	5.33E-01	5.48E-01	6.04E-01	5.84E-01	5.93E-01	5.98E-01	6.07E-01	6.26E-01	6.50E-01	6.93E-01	5.98E-01	8.28E-01	1.18E+00	9.93E-01	8.88E-01	7.84E-01	7.60E-01	7.21E-01	6.91E-01	7.35E-01	7.75E-01	8.73E-01	1.05E+00	1.16E+00	1.20E+00	1.44E+00	1.68E+00	1.72E+00
8.71E-01	3.57E-01	4.32E-01	5.15E-01	5.35E-01	6.13E-01	5.86E-01	5.98E-01	6.05E-01	6.22E-01	6.46E-01	6.66E-01	7.05E-01	6.24E-01	8.05E-01	1.19E+00	9.94E-01	8.85E-01	7.76E-01	7.56E-01	7.22E-01	6.96E-01	7.37E-01	7.74E-01	8.70E-01	1.04E+00	1.15E+00	1.19E+00	1.43E+00	1.67E+00	1.72E+00
8.86E-01	3.26E-01	4.49E-01	5.32E-01	5.27E-01	6.09E-01	5.82E-01	5.93E-01	6.00E-01	6.18E-01	6.44E-01	6.67E-01	7.08E-01	6.18E-01	8.32E-01	1.19E+00	1.00E+00	8.90E-01	7.81E-01	7.61E-01	7.25E-01	7.01E-01	7.29E-01	7.52E-01	8.58E-01	1.04E+00	1.16E+00	1.20E+00	1.43E+00	1.67E+00	1.71E+00
9.16E-01	3.10E-01	4.27E-01	5.41E-01	5.35E-01	6.17E-01	5.90E-01	6.01E-01	6.08E-01	6.15E-01	6.30E-01	6.53E-01	6.94E-01	6.05E-01	8.13E-01	1.19E+00	9.97E-01	8.95E-01	7.91E-01	7.70E-01	7.32E-01	7.06E-01	7.33E-01	7.54E-01	8.58E-01	1.04E+00	1.15E+00	1.19E+00	1.43E+00	1.66E+00	1.70E+00
9.34E-01	3.20E-01	4.14E-01	5.45E-01	5.57E-01	6.21E-01	5.98E-01	6.08E-01	6.14E-01	6.24E-01	6.42E-01	6.64E-01	7.05E-01	6.17E-01	8.25E-01	1.19E+00	1.00E+00	8.96E-01	7.91E-01	7.78E-01	7.53E-01	7.36E-01	7.52E-01	7.64E-01	8.69E-01	1.05E+00	1.16E+00	1.20E+00	1.43E+00	1.66E+00	1.70E+00
9.40E-01	3.06E-01	4.42E-01	5.55E-01	5.62E-01	6.14E-01	5.96E-01	6.04E-01	6.08E-01	6.22E-01	6.45E-01	6.68E-01	7.08E-01	6.21E-01	8.28E-01	1.18E+00	9.98E-01	8.95E-01	7.92E-01	7.76E-01	7.47E-01	7.25E-01	7.58E-01	7.86E-01	8.83E-01	1.05E+00	1.16E+00	1.20E+00	1.42E+00	1.65E+00	1.69E+00
9.58E-01	3.12E-01	4.37E-01	5.35E-01	5.54E-01	6.18E-01	5.95E-01	6.05E-01	6.11E-01	6.29E-01	6.53E-01	6.73E-01	7.10E-01	6.32E-01	8.04E-01	1.19E+00	9.98E-01	8.89E-01	7.80E-01	7.68E-01	7.44E-01	7.25E-01	7.61E-01	7.93E-01	8.87E-01	1.05E+00	1.16E+00	1.20E+00	1.43E+00	1.66E+00	1.71E+00
9.83E-01	3.19E-01	4.06E-01	5.29E-01	5.63E-01	5.78E-01	5.70E-01	5.74E-01	5.76E-01	6.09E-01	6.51E-01	6.69E-01	7.05E-01	6.32E-01	7.84E-01	1.20E+00	9.95E-01	8.84E-01	7.71E-01	7.59E-01	7.36E-01	7.17E-01	7.54E-01	7.86E-01	8.84E-01	1.06E+00	1.17E+00	1.21E+00	1.44E+00	1.67E+00	1.72E+00
9.05E-01	3.11E-01	4.19E-01	5.44E-01	5.50E-01	5.87E-01	5.73E-01	5.79E-01	5.83E-01	6.29E-01	6.80E-01	6.98E-01	7.31E-01	6.63E-01	8.04E-01	1.19E+00	1.00E+00	8.93E-01	7.86E-01	7.67E-01	7.33E-01	7.07E-01	7.53E-01	7.94E-01	8.88E-01	1.06E+00	1.17E+00	1.20E+00	1.44E+00	1.67E+00	1.72E+00
8.27E-01	3.19E-01	4.09E-01	5.39E-01	5.54E-01	5.86E-01	5.74E-01	5.80E-01	5.83E-01	6.18E-01	6.61E-01	6.81E-01	7.18E-01	6.40E-01	8.15E-01	1.19E+00	9.99E-01	8.89E-01	7.80E-01	7.67E-01	7.42E-01	7.22E-01	7.55E-01	7.84E-01	8.81E-01	1.05E+00	1.16E+00	1.20E+00	1.44E+00	1.68E+00	1.72E+00
9.13E-01	3.20E-01	4.03E-01	5.36E-01	5.44E-01	5.99E-01	5.79E-01	5.88E-01	5.93E-01	6.28E-01	6.70E-01	6.89E-01	7.24E-01	6.51E-01	8.07E-01	1.19E+00	1.00E+00	8.94E-01	7.86E-01	7.77E-01	7.56E-01	7.41E-01	7.63E-01	7.80E-01	8.80E-01	1.05E+00	1.16E+00	1.20E+00	1.44E+00	1.68E+00	1.72E+00
9.54E-01	3.22E-01	4.24E-01	5.22E-01	5.34E-01	5.96E-01	5.74E-01	5.84E-01	5.90E-01	6.29E-01	6.74E-01	6.94E-01	7.30E-01	6.54E-01	8.25E-01	1.19E+00	1.00E+00	8.94E-01	7.86E-01	7.72E-01	7.45E-01	7.25E-01	7.56E-01	7.82E-01	8.79E-01	1.05E+00	1.16E+00	1.20E+00	1.44E+00	1.67E+00	1.72E+00
9.59E-01	3.23E-01	4.14E-01	5.35E-01	5.46E-01	6.10E-01	5.87E-01	5.97E-01	6.03E-01	6.34E-01	6.73E-01	6.94E-01	7.32E-01	6.51E-01	8.38E-01	1.20E+00	1.01E+00	8.90E-01	7.77E-01	7.66E-01	7.45E-01	7.29E-01	7.60E-01	7.88E-01	8.84E-01	1.05E+00	1.16E+00	1.20E+00	1.44E+00	1.68E+00	1.73E+00
9.62E-01	3.28E-01	4.37E-01	5.40E-01	5.43E-01	5.90E-01	5.74E-01	5.81E-01	5.85E-01	6.26E-01	6.75E-01	6.95E-01	7.32E-01	6.53E-01	8.30E-01	1.20E+00	1.01E+00	8.94E-01	7.81E-01	7.64E-01	7.34E-01	7.10E-01	7.52E-01	7.90E-01	8.83E-01	1.05E+00	1.16E+00	1.20E+00	1.44E+00	1.68E+00	1.72E+00
1.01E+00	3.27E-01	4.51E-01	5.42E-01	5.48E-01	5.92E-01	5.76E-01	5.83E-01	5.87E-01	6.22E-01	6.65E-01	6.87E-01	7.26E-01	6.42E-01	8.35E-01	1.19E+00	1.00E+00	8.86E-01	7.73E-01	7.58E-01	7.31E-01	7.08E-01	7.52E-01	7.91E-01	8.83E-01	1.05E+00	1.15E+00	1.19E+00	1.43E+00	1.67E+00	1.72E+00
1.02E+00	3.28E-01	4.47E-01	5.31E-01	5.56E-01	5.91E-01	5.77E-01	5.84E-01	5.88E-01	6.33E-01	6.85E-01	7.05E-01	7.40E-01	6.65E-01	8.33E-01	1.19E+00	1.00E+00	8.91E-01	7.81E-01	7.63E-01	7.32E-01	7.07E-01	7.51E-01	7.90E-01	8.81E-01	1.04E+00	1.15E+00	1.19E+00	1.43E+00	1.67E+00	1.71E+00
1.01E+00	3.30E-01	4.61E-01	5.41E-01	5.47E-01	5.83E-01	5.70E-01	5.76E-01	5.79E-01	6.20E-01	6.69E-01	6.89E-01	7.26E-01	6.48E-01	8.25E-01	1.19E+00	9.96E-01	8.75E-01	7.59E-01	7.51E-01	7.34E-01	7.20E-01	7.54E-01	7.84E-01	8.76E-01	1.04E+00	1.14E+00	1.18E+00	1.43E+00	1.67E+00	1.72E+00
9.85E-01	3.42E-01	4.37E-01	5.29E-01	5.42E-01	5.83E-01	5.68E-01	5.74E-01	5.79E-01	6.19E-01	6.67E-01	6.87E-01	7.24E-01	6.47E-01	8.19E-01	1.19E+00	9.97E-01	8.82E-01	7.70E-01	7.57E-01	7.33E-01	7.12E-01	7.59E-01	8.03E-01	8.88E-01	1.04E+00	1.14E+00	1.18E+00	1.42E+00	1.66E+00	1.70E+00
8.22E-01	3.25E-01	4.49E-01	5.29E-01	5.42E-01	5.99E-01	5.79E-01	5.88E-01	5.93E-01	6.20E-01	6.56E-01	6.77E-01	7.16E-01	6.32E-01	8.26E-01	1.18E+00	9.94E-01	8.81E-01	7.72E-01	7.60E-01	7.39E-01	7.20E-01	7.61E-01	7.97E-01	8.85E-01	1.04E+00	1.14E+00	1.18E+00	1.42E+00	1.66E+00	1.70E+00
6.11E-01	3.27E-01	4.37E-01	5.37E-01	5.35E-01	6.03E-01	5.80E-01	5.90E-01	5.96E-01	6.19E-01	6.50E-01	6.72E-01	7.12E-01	6.26E-01	8.26E-01	1.18E+00	9.93E-01	8.81E-01	7.72E-01	7.62E-01	7.43E-01	7.26E-01	7.65E-01	8.01E-01	8.93E-01	1.06E+00	1.16E+00	1.20E+00	1.44E+00	1.68E+00	1.72E+00
4.50E-01	3.27E-01	4.61E-01	5.53E-01	5.39E-01	6.26E-01	5.98E-01	6.09E-01	6.17E-01	6.39E-01	6.68E-01	6.89E-01	7.27E-01	6.44E-01	8.43E-01	1.17E+00	9.93E-01	8.84E-01	7.80E-01	7.69E-01	7.48E-01	7.31E-01	7.64E-01	7.94E-01	8.88E-01	1.05E+00	1.16E+00	1.20E+00	1.44E+00	1.68E+00	1.72E+00
4.65E-01	3.06E-01	4.37E-01	5.51E-01	5.53E-01	6.26E-01	6.01E-01	6.11E-01	6.18E-01	6.42E-01	6.73E-01	6.93E-01	7.30E-01	6.51E-01	8.32E-01	1.18E+00	1.00E+00	8.98E-01	7.97E-01	7.82E-01	7.55E-01	7.34E-01	7.66E-01	7.94E-01	8.87E-01	1.05E+00	1.15E+00	1.19E+00	1.44E+00	1.67E+00	1.72E+00
6.79E-01	2.80E-01	4.29E-01	5.52E-01	5.62E-01	6.23E-01	6.02E-01	6.11E-01	6.17E-01	6.39E-01	6.70E-01	6.90E-01	7.28E-01	6.47E-01	8.33E-01	1.18E+00	1.00E+00	8.92E-01	7.85E-01	7.67E-01	7.35E-01	7.11E-01	7.49E-01	7.83E-01	8.79E-01	1.05E+00	1.16E+00	1.20E+00	1.44E+00	1.67E+00	1.72E+00
7.15E-01	3.39E-01	4.22E-01	5.61E-01	5.42E-01	6.27E-01	5.99E-01	6.11E-01	6.18E-01	6.44E-01	6.76E-01	6.95E-01	7.30E-01	6.55E-01	8.22E-01	1.18E+00	9.94E-01	8.86E-01	7.80E-01	7.65E-01	7.38E-01	7.17E-01	7.58E-01	7.95E-01	8.87E-01	1.05E+00	1.16E+00	1.20E+00	1.43E+00	1.66E+00	1.70E+00
7.38E-01	3.40E-01	4.39E-01	5.66E-01	5.26E-01	6.35E-01	6.01E-01	6.15E-01	6.24E-01	6.46E-01	6.73E-01	6.94E-01	7.31E-01	6.51E-01	8.38E-01	1.18E+00	9.97E-01	8.87E-01	7.80E-01	7.66E-01	7.40E-01	7.18E-01	7.61E-01	7.99E-01	8.89E-01	1.05E+00	1.15E+00	1.19E+00	1.43E+00	1.66E+00	1.70E+00
7.24E-01	3.19E-01	4.47E-01	5.59E-01	5.49E-01	6.16E-01	5.94E-01	6.03E-01	6.09E-01	6.26E-01	6.52E-01	6.74E-01	7.13E-01	6.29E-01	8.26E-01	1.17E+00	9.91E-01	8.84E-01	7.78E-01	7.68E-01	7.50E-01	7.34E-01	7.67E-01	7.95E-01	8.88E-01	1.05E+00	1.16E+00	1.20E+00	1.43E+00	1.67E+00	1.71E+00
7.25E-01	3.20E-01	4.39E-01	5.52E-01	5.42E-01	6.20E-01	5.94E-01	6.05E-01	6.11E-01	6.30E-01	6.55E-01	6.76E-01	7.14E-01	6.33E-01	8.22E-01	1.16E+00	9.88E-01	8.89E-01	7.91E-01	7.80E-01	7.60E-01	7.42E-01	7.81E-01	8.16E-01	9.04E-01	1.06E+00	1.16E+00	1.20E+00	1.43E+00	1.66E+00	1.71E+00
7.13E-01	3.32E-01	4.37E-01	5.22E-01	5.42E-01	6.27E-01	5.97E-01	6.10E-01	6.18E-01	6.40E-01	6.68E-01	6.89E-01	7.26E-01	6.46E-01	8.29E-01	1.17E+00	9.94E-01	8.86E-01	7.80E-01	7.65E-01	7.36E-01	7.14E-01	7.53E-01	7.87E-01	8.84E-01	1.06E+00	1.17E+00	1.20E+00	1.43E+00	1.66E+00	1.70E+00
6.89E-01	3.53E-01	4.32E-01	5.22E-01	5.14E-01	6.37E-01	5.97E-01	6.13E-01	6.24E-01	6.42E-01	6.64E-01	6.85E-01	7.24E-01	6.42E-01	8.28E-01	1.20E+00	1.01E+00	8.92E-01	7.81E-01	7.60E-01	7.24E-01	6.98E-01	7.34E-01	7.64E-01	8.70E-01	1.06E+00	1.17E+00	1.21E+00	1.44E+00	1.66E+00	1.70E+00
6.78E-01	3.41E-01	4.63E-01	5.34E-01	5.23E-01	6.31E-01	5.95E-01	6.10E-01	6.19E-01	6.41E-01	6.69E-01	6.91E-01	7.31E-01	6.45E-01	8.50E-01	1.19E+00	1.01E+00	9.01E-01	7.93E-01	7.76E-01	7.44E-01	7.22E-01	7.48E-01	7.69E-01	8.66E-01	1.03E+00	1.14E+00	1.18E+00	1.42E+00	1.66E+00	1.70E+00
6.00E-01	3.25E-01	4.34E-01	5.18E-01	5.23E-01	6.23E-01	5.89E-01	6.03E-01	6.12E-01	6.39E-01	6.72E-01	6.93E-01	7.32E-01	6.49E-01	8.42E-01	1.19E+00	1.01E+00	9.05E-01	8.01E-01	7.82E-01	7.47E-01	7.24E-01	7.41E-01	7.54E-01	8.55E-01	1.03E+00	1.14E+00	1.18E+00	1.42E+00	1.66E+00	1.71E+00
7.05E-01	3.58E-01	4.42E-01	5.09E-01	5.31E-01	6.20E-01	5.89E-01	6.02E-01	6.11E-01	6.25E-01	6.47E-01	6.70E-01	7.10E-01	6.22E-01	8.30E-01	1.18E+00	1.00E+00	9.05E-01	8.06E-01	7.84E-01	7.46E-01	7.20E-01	7.48E-01	7.72E-01	8.66E-01	1.03E+00	1.13E+00	1.17E+00	1.42E+00	1.66E+00	1.71E+00
9.22E-01	3.39E-01	4.39E-01	5.15E-01	5.34E-01	6.22E-01	5.91E-01	6.04E-01	6.12E-01	6.35E-01	6.64E-01	6.85E-01	7.24E-01	6.41E-01	8.35E-01	1.18E+00	1.00E+00	8.99E-01	7.98E-01	7.85E-01	7.59E-01	7.43E-01	7.57E-01	7.67E-01	8.67E-01	1.04E+00	1.15E+00	1.19E+00	1.42E+00	1.66E+00	1.70E+00
9.48E-01	3.49E-01	4.49E-01	4.77E-01	5.40E-01	6.03E-01	5.78E-01	5.89E-01	5.96E-01	6.27E-01	6.65E-01	6.87E-01	7.26E-01	6.42E-01	8.37E-01	1.18E+00	1.00E+00	9.01E-01	7.98E-01	7.82E-01	7.53E-01	7.33E-01	7.57E-01	7.76E-01	8.72E-01	1.04E+00	1.14E+00	1.18E+00	1.42E+00	1.65E+00	1.70E+00
9.19E-01	3.48E-01	4.42E-01	4.93E-01	5.42E-01	6.08E-01	5.83E-01	5.94E-01	6.01E-01	6.34E-01	6.74E-01	6.94E-01	7.30E-01	6.54E-01	8.27E-01	1.18E+00	1.00E+00	8.97E-01	7.94E-01	7.78E-01	7.50E-01	7.29E-01	7.60E-01	7.88E-01	8.79E-01	1.04E+00	1.14E+00	1.18E+00	1.40E+00	1.63E+00	1.67E+00
9.08E-01	3.69E-01	4.44E-01	4.96E-01	5.21E-01	6.09E-01	5.78E-01	5.91E-01	5.99E-01	6.23E-01	6.53E-01	6.74E-01	7.13E-01	6.30E-01	8.17E-01	1.19E+00	9.98E-01	8.86E-01	7.75E-01	7.70E-01	7.57E-01	7.48E-01	7.66E-01	7.80E-01	8.75E-01	1.04E+00	1.14E+00	1.18E+00	1.41E+00	1.64E+00	1.69E+00
8.84E-01	3.78E-01	4.66E-01	5.08E-01	5.27E-01	6.11E-01	5.82E-01	5.94E-01	6.02E-01	6.32E-01	6.69E-01	6.90E-01	7.29E-01	6.45E-01	8.43E-01	1.18E+00	1.00E+00	9.00E-01	7.98E-01	7.79E-01	7.44E-01	7.20E-01	7.49E-01	7.73E-01	8.67E-01	1.03E+00	1.14E+00	1.18E+00	1.42E+00	1.66E+00	1.70E+00
8.45E-01	3.58E-01	4.32E-01	5.07E-01	5.35E-01	6.15E-01	5.87E-01	5.99E-01	6.07E-01	6.27E-01	6.54E-01	6.77E-01	7.18E-01	6.29E-01	8.44E-01	1.18E+00	9.99E-01	8.89E-01	7.84E-01	7.67E-01	7.36E-01	7.13E-01	7.49E-01	7.81E-01	8.74E-01	1.04E+00	1.15E+00	1.19E+00	1.43E+00	1.66E+00	1.71E+00
8.83E-01	3.48E-01	4.51E-01	5.02E-01	5.48E-01	6.12E-01	5.87E-01	5.98E-01	6.04E-01	6.27E-01	6.57E-01	6.79E-01	7.18E-01	6.33E-01	8.35E-01	1.18E+00	9.99E-01	8.90E-01	7.84E-01	7.63E-01	7.27E-01	6.99E-01	7.39E-01	7.74E-01	8.69E-01	1.04E+00	1.14E+00	1.18E+00	1.42E+00	1.65E+00	1.70E+00
9.16E-01	3.47E-01	4.37E-01	5.27E-01	5.47E-01	6.10E-01	5.88E-01	5.98E-01	6.04E-01	6.29E-01	6.63E-01	6.85E-01	7.24E-01	6.39E-01	8.42E-01	1.18E+00	1.00E+00	8.98E-01	7.96E-01	7.75E-01	7.40E-01	7.13E-01	7.57E-01	7.97E-01	8.85E-01	1.04E+00	1.14E+00	1.18E+00	1.42E+00	1.65E+00	1.69E+00
9.18E-01	3.16E-01	4.77E-01	5.20E-01	5.49E-01	6.08E-01	5.86E-01	5.96E-01	6.01E-01	6.29E-01	6.64E-01	6.86E-01	7.25E-01	6.41E-01	8.40E-01	1.18E+00	1.01E+00	9.07E-01	8.06E-01	7.86E-01	7.52E-01	7.24E-01	7.70E-01	8.12E-01	8.97E-01	1.05E+00	1.15E+00	1.19E+00	1.42E+00	1.64E+00	1.68E+00
9.25E-01	3.16E-01	4.61E-01	5.36E-01	5.50E-01	5.86E-01	5.73E-01	5.79E-01	5.82E-01	6.13E-01	6.53E-01	6.74E-01	7.14E-01	6.29E-01	8.26E-01	1.19E+00	1.00E+00	8.96E-01	7.89E-01	7.70E-01	7.36E-01	7.08E-01	7.59E-01	8.06E-01	8.91E-01	1.05E+00	1.15E+00	1.18E+00	1.42E+00	1.65E+00	1.69E+00
9.28E-01	3.26E-01	4.49E-01	5.39E-01	5.54E-01	5.85E-01	5.73E-01	5.79E-01	5.82E-01	6.15E-01	6.58E-01	6.81E-01	7.22E-01	6.33E-01	8.47E-01	1.18E+00	1.01E+00	9.03E-01	8.02E-01	7.84E-01	7.52E-01	7.27E-01	7.66E-01	8.01E-01	8.89E-01	1.05E+00	1.15E+00	1.18E+00	1.41E+00	1.64E+00	1.69E+00
9.35E-01	3.54E-01	4.44E-01	5.17E-01	5.60E-01	6.07E-01	5.88E-01	5.97E-01	6.02E-01	6.22E-01	6.52E-01	6.74E-01	7.14E-01	6.27E-01	8.31E-01	1.19E+00	9.99E-01	8.86E-01	7.75E-01	7.63E-01	7.41E-01	7.23E-01	7.56E-01	7.84E-01	8.80E-01	1.05E+00	1.16E+00	1.19E+00	1.42E+00	1.65E+00	1.69E+00
9.69E-01	3.48E-01	4.54E-01	5.19E-01	5.55E-01	5.95E-01	5.79E-01	5.87E-01	5.91E-01	6.27E-01	6.70E-01	6.89E-01	7.24E-01	6.51E-01	8.12E-01	1.17E+00	9.96E-01	9.01E-01	8.04E-01	7.85E-01	7.51E-01	7.28E-01	7.50E-01	7.67E-01	8.67E-01	1.04E+00	1.15E+00	1.19E+00	1.42E+00	1.64E+00	1.69E+00
9.49E-01	3.36E-01	4.29E-01	5.43E-01	5.58E-01	6.04E-01	5.87E-01	5.94E-01	5.99E-01	6.32E-01	6.72E-01	6.92E-01	7.29E-01	6.51E-01	8.29E-01	1.17E+00	9.96E-01	8.95E-01	7.94E-01	7.83E-01	7.60E-01	7.46E-01	7.57E-01	7.64E-01	8.66E-01	1.04E+00	1.15E+00	1.19E+00	1.42E+00	1.65E+00	1.69E+00
9.52E-01	3.56E-01	4.27E-01	5.55E-01	5.52E-01	6.06E-01	5.87E-01	5.95E-01	6.00E-01	6.37E-01	6.80E-01	6.99E-01	7.34E-01	6.61E-01	8.23E-01	1.17E+00	9.95E-01	8.91E-01	7.89E-01	7.75E-01	7.48E-01	7.30E-01	7.50E-01	7.65E-01	8.66E-01	1.04E+00	1.15E+00	1.19E+00	1.42E+00	1.66E+00	1.70E+00
9.16E-01	3.36E-01	4.39E-01	5.62E-01	5.53E-01	5.96E-01	5.82E-01	5.88E-01	5.92E-01	6.36E-01	6.88E-01	7.07E-01	7.42E-01	6.68E-01	8.36E-01	1.18E+00	9.99E-01	8.87E-01	7.80E-01	7.58E-01	7.20E-01	6.92E-01	7.33E-01	7.70E-01	8.68E-01	1.04E+00	1.15E+00	1.19E+00	1.43E+00	1.66E+00	1.70E+00
8.68E-01	3.25E-01	4.49E-01	5.51E-01	5.62E-01	5.94E-01	5.82E-01	5.87E-01	5.91E-01	6.25E-01	6.68E-01	6.89E-01	7.28E-01	6.45E-01	8.41E-01	1.18E+00	9.97E-01	8.88E-01	7.81E-01	7.66E-01	7.38E-01	7.18E-01	7.45E-01	7.67E-01	8.67E-01	1.04E+00	1.15E+00	1.19E+00	1.42E+00	1.65E+00	1.70E+00
8.50E-01	3.28E-01	4.29E-01	5.33E-01	5.73E-01	5.67E-01	5.66E-01	5.67E-01	5.68E-01	6.16E-01	6.75E-01	6.96E-01	7.33E-01	6.54E-01	8.35E-01	1.19E+00	1.00E+00	8.86E-01	7.74E-01	7.67E-01	7.49E-01	7.37E-01	7.54E-01	7.66E-01	8.69E-01	1.04E+00	1.16E+00	1.19E+00	1.42E+00	1.65E+00	1.70E+00
8.53E-01	3.18E-01	4.44E-01	5.43E-01	5.69E-01	5.70E-01	5.67E-01	5.69E-01	5.71E-01	6.19E-01	6.77E-01	6.96E-01	7.32E-01	6.57E-01	8.22E-01	1.19E+00	1.00E+00	8.86E-01	7.74E-01	7.74E-01	7.67E-01	7.63E-01	7.73E-01	7.79E-01	8.80E-01	1.05E+00	1.16E+00	1.20E+00	1.43E+00	1.65E+00	1.70E+00
8.42E-01	3.11E-01	4.06E-01	5.64E-01	5.72E-01	5.66E-01	5.67E-01	5.67E-01	5.68E-01	6.19E-01	6.80E-01	7.01E-01	7.38E-01	6.59E-01	8.37E-01	1.20E+00	1.00E+00	8.83E-01	7.66E-01	7.69E-01	7.66E-01	7.64E-01	7.77E-01	7.85E-01	8.83E-01	1.05E+00	1.15E+00	1.19E+00	1.42E+00	1.65E+00	1.70E+00
8.31E-01	3.01E-01	4.22E-01	5.74E-01	5.98E-01	5.98E-01	5.95E-01	5.97E-01	5.98E-01	6.41E-01	6.92E-01	7.11E-01	7.45E-01	6.73E-01	8.30E-01	1.19E+00	1.00E+00	8.86E-01	7.75E-01	7.74E-01	7.65E-01	7.59E-01	7.74E-01	7.84E-01	8.83E-01	1.05E+00	1.16E+00	1.20E+00	1.43E+00	1.66E+00	1.70E+00
8.32E-01	3.24E-01	4.14E-01	5.84E-01	5.98E-01	5.94E-01	5.93E-01	5.94E-01	5.95E-01	6.39E-01	6.92E-01	7.12E-01	7.47E-01	6.71E-01	8.46E-01	1.18E+00	1.00E+00	8.87E-01	7.77E-01	7.76E-01	7.68E-01	7.64E-01	7.70E-01	7.72E-01	8.75E-01	1.05E+00	1.16E+00	1.20E+00	1.42E+00	1.65E+00	1.69E+00
8.37E-01	3.22E-01	4.17E-01	5.79E-01	5.72E-01	5.98E-01	5.89E-01	5.93E-01	5.96E-01	6.45E-01	7.01E-01	7.19E-01	7.52E-01	6.82E-01	8.36E-01	1.17E+00	9.94E-01	8.76E-01	7.63E-01	7.75E-01	7.84E-01	7.93E-01	7.80E-01	7.62E-01	8.68E-01	1.04E+00	1.15E+00	1.19E+00	1.42E+00	1.64E+00	1.68E+00
8.36E-01	3.20E-01	4.47E-01	5.69E-01	5.57E-01	5.85E-01	5.76E-01	5.80E-01	5.83E-01	6.43E-01	7.10E-01	7.29E-01	7.63E-01	6.91E-01	8.57E-01	1.17E+00	9.94E-01	8.73E-01	7.61E-01	7.73E-01	7.84E-01	7.91E-01	7.98E-01	8.03E-01	8.92E-01	1.04E+00	1.14E+00	1.18E+00	1.43E+00	1.67E+00	1.71E+00
8.25E-01	3.33E-01	4.22E-01	5.58E-01	5.65E-01	5.74E-01	5.70E-01	5.72E-01	5.74E-01	6.40E-01	7.14E-01	7.34E-01	7.69E-01	6.94E-01	8.70E-01	1.17E+00	1.00E+00	8.78E-01	7.64E-01	7.74E-01	7.82E-01	7.88E-01	7.89E-01	7.88E-01	8.85E-01	1.05E+00	1.15E+00	1.19E+00	1.43E+00	1.67E+00	1.72E+00
8.24E-01	3.16E-01	4.22E-01	5.30E-01	5.54E-01	5.76E-01	5.66E-01	5.71E-01	5.74E-01	6.32E-01	7.02E-01	7.26E-01	7.66E-01	6.76E-01	9.05E-01	1.18E+00	1.01E+00	8.72E-01	7.52E-01	7.60E-01	7.67E-01	7.70E-01	7.82E-01	7.90E-01	8.84E-01	1.04E+00	1.14E+00	1.18E+00	1.42E+00	1.66E+00	1.70E+00
8.51E-01	3.29E-01	4.54E-01	5.60E-01	5.79E-01	6.12E-01	5.99E-01	6.05E-01	6.08E-01	6.41E-01	6.83E-01	7.05E-01	7.44E-01	6.58E-01	8.65E-01	1.19E+00	1.01E+00	8.77E-01	7.58E-01	7.70E-01	7.82E-01	7.90E-01	7.97E-01	8.01E-01	8.92E-01	1.04E+00	1.14E+00	1.18E+00	1.42E+00	1.65E+00	1.70E+00
8.47E-01	3.09E-01	4.03E-01	5.33E-01	5.77E-01	5.93E-01	5.84E-01	5.89E-01	5.92E-01	6.43E-01	7.03E-01	7.21E-01	7.53E-01	6.85E-01	8.34E-01	1.18E+00	1.00E+00	8.86E-01	7.76E-01	7.87E-01	7.97E-01	8.05E-01	7.99E-01	7.90E-01	8.85E-01	1.04E+00	1.14E+00	1.18E+00	1.43E+00	1.67E+00	1.72E+00
8.56E-01	3.25E-01	4.34E-01	5.32E-01	5.70E-01	6.04E-01	5.90E-01	5.97E-01	6.01E-01	6.38E-01	6.83E-01	7.01E-01	7.35E-01	6.64E-01	8.18E-01	1.19E+00	9.97E-01	8.81E-01	7.67E-01	7.75E-01	7.79E-01	7.82E-01	7.88E-01	7.91E-01	8.85E-01	1.04E+00	1.14E+00	1.18E+00	1.43E+00	1.67E+00	1.71E+00
8.56E-01	2.94E-01	4.17E-01	5.47E-01	5.74E-01	6.14E-01	5.98E-01	6.06E-01	6.10E-01	6.50E-01	6.98E-01	7.16E-01	7.51E-01	6.78E-01	8.40E-01	1.19E+00	9.99E-01	8.67E-01	7.44E-01	7.56E-01	7.68E-01	7.74E-01	7.86E-01	7.94E-01	8.87E-01	1.05E+00	1.15E+00	1.19E+00	1.44E+00	1.68E+00	1.73E+00
