# Supplementary material for: Hybrid ARIMA and Neural Network Modelling Applied to Telecommunications in Urban Environments in the Amazon Region
Source: Hindawi journal article supplement (doi:10.1155/2020/2671746), 2020-02-24
Supplement: f1 [file 2671746.f1.zip › 2671746.f1/Intructions for .csv archives.txt]

Intructions for .csv archives

The columns of the .csv archives refers to the floors of each measured building.

In the first lline, we have the identification of the measured floors in each building/dataset. From the second line until the last one we have electric field measured samples. 

When implementating this data on the studied series, we calculated the mean value of each collumn (considering valus from the second line until the last).
